# Supplementary material for: Effect of high-flow nasal cannula oxygen therapy compared with conventional oxygen therapy in postoperative patients: a systematic review and meta-analysis
Source: PubMed Central journal article supplement — BMJ Open. 2019 Aug 2;9(8):e027523. doi: 10.1136/bmjopen-2018-027523 (PMC6687012; doi:10.1136/bmjopen-2018-027523), 2019-08-02
Supplement: bmjopen-2018-027523.draft_revisions.pdf [file bmjopen-2018-027523.draft_revisions.pdf]

# BMJ Open

BMJ Open is committed to open peer review. As part of this commitment we make the peer review history of every article we publish publicly available.

When an article is published we post the peer reviewers' comments and the authors' responses online. We also post the versions of the paper that were used during peer review. These are the versions that the peer review comments apply to.

The versions of the paper that follow are the versions that were submitted during the peer review process. They are not the versions of record or the final published versions. They should not be cited or distributed as the published version of this manuscript.

BMJ Open is an open access journal and the full, final, typeset and author-corrected version of record of the manuscript is available on our site with no access controls, subscription charges or pay-per-view fees (<http://bmjopen.bmj.com>).

If you have any questions on BMJ Open's open peer review process please email [info.bmjopen@bmj.com](mailto:info.bmjopen@bmj.com)

# BMJ Open

## The effect of high-flow nasal cannula oxygen therapy compared with conventional oxygen therapy in postoperative patient: a systematic review and meta-analysis

|                               |                                                                                                                                                                                                                                                                                                                                                                                                                                                                                                                                                                                                                                                                                                                                                                                                                                                                                                                                                                                     |
|-------------------------------|-------------------------------------------------------------------------------------------------------------------------------------------------------------------------------------------------------------------------------------------------------------------------------------------------------------------------------------------------------------------------------------------------------------------------------------------------------------------------------------------------------------------------------------------------------------------------------------------------------------------------------------------------------------------------------------------------------------------------------------------------------------------------------------------------------------------------------------------------------------------------------------------------------------------------------------------------------------------------------------|
| Journal:                      | <i>BMJ Open</i>                                                                                                                                                                                                                                                                                                                                                                                                                                                                                                                                                                                                                                                                                                                                                                                                                                                                                                                                                                     |
| Manuscript ID                 | bmjopen-2018-027523                                                                                                                                                                                                                                                                                                                                                                                                                                                                                                                                                                                                                                                                                                                                                                                                                                                                                                                                                                 |
| Article Type:                 | Research                                                                                                                                                                                                                                                                                                                                                                                                                                                                                                                                                                                                                                                                                                                                                                                                                                                                                                                                                                            |
| Date Submitted by the Author: | 30-Oct-2018                                                                                                                                                                                                                                                                                                                                                                                                                                                                                                                                                                                                                                                                                                                                                                                                                                                                                                                                                                         |
| Complete List of Authors:     | Lu, Zhonghua; Department of Critical Care Medicine, Zhongda Hospital, School of Medicine, Southeast University<br>Chang, Wei; Zhongda Hospital, School of Medicine, Southeast University, Department of Critical Care Medicine<br>Meng, Shan-Shan; Zhongda Hospital, School of Medicine, Southeast University, Department of Critical Care Medicine<br>Zhang, Xiwen; Zhongda Hospital, School of Medicine, Southeast University<br>Xie, Jianfeng; School of Medicine, Southeast University, Critical Care Medicine;<br>Xu, Jing-Yuan; Zhongda Hospital, School of Medicine, Southeast University, Department of Critical Care Medicine<br>Qiu, Haibo; Zhongda Hospital, School of Medicine, Southeast University<br>Yang, Yi; Zhongda Hospital, School of Medicine, Southeast University, Department of Critical Care Medicine<br>Guo, FM; Department of Critical Care Medicine, Zhongda Hospital, School of Medicine, Southeast University, Zhongda Hospital, Southeast University |
| Keywords:                     | high flow nasal cannula, surgical patients, reintubation, escalation of respiratory support, pulmonary complications                                                                                                                                                                                                                                                                                                                                                                                                                                                                                                                                                                                                                                                                                                                                                                                                                                                                |
|                               |                                                                                                                                                                                                                                                                                                                                                                                                                                                                                                                                                                                                                                                                                                                                                                                                                                                                                                                                                                                     |

SCHOLARONE™  
Manuscripts

1  
2  
3  
4 **The effect of high-flow nasal cannula oxygen therapy compared with**  
5 **conventional oxygen therapy in postoperative patient: a systematic review and**  
6 **meta-analysis**  
7  
8  
9

10  
11 Zhonghua Lu, MD<sup>1</sup>; Wei Chang; MD<sup>1</sup>, Shanshan Meng, MD<sup>1</sup>; Xiwen Zhang, MD<sup>1</sup>;  
12 Jianfeng Xie, MD<sup>1</sup>; Jingyuan Xu, MD<sup>1</sup>; Haibo Qiu, MD, PHD <sup>1</sup>; Yi Yang, MD, PHD  
13 <sup>1</sup>; Fengmei Guo, MD, PHD<sup>1</sup>  
14  
15  
16  
17

18  
19 Corresponding author:

20  
21 Fengmei Guo

22  
23 Tel: +86-25-83272200;

24  
25 Fax: +86-25-83272011;

26  
27 Zhongda Hospital, Southeast University, 87 Dingjia Bridge, Hunan Road, Gu Lou

28  
29 District, 210009, Nanjing, China

30  
31 Email: fmguo2003@139.com  
32  
33

34  
35 The authors' affiliations are as follows:

36  
37 <sup>1</sup>Department of Critical Care Medicine, Zhongda Hospital, School of Medicine,  
38 Southeast University, Nanjing, China  
39  
40

41  
42 Email addresses of the authors:

43  
44 Zhonghua Lu: luzhonghua077@126.com

45  
46 Wei Chang: ewei\_0181@126.com

47  
48 Shanshan Meng: mengshanshan0101@163.com

49  
50 Xiwen Zhang: xiwen\_zhang@126.com

51  
52 Jianfeng Xie: xie820405@126.com

53  
54 Jingyuan Xu: xujingyuanmail@163.com

55  
56 Haibo Qiu: haiboq2000@163.com

57  
58 Yi Yang: yiyiyang2004@163.com

59  
60 Fengmei Guo: fmguo2003@139.com

1  
2  
3  
4 **Objective:** Postoperative respiratory failure is common in postoperative patient after  
5 extubation, with increased reintubation rate and mortality. We aim to evaluate the  
6 effect of high flow nasal cannula oxygen therapy (HFNC) on reintubation rate  
7 compared with conventional oxygen therapy (COT) in post-operative patients in this  
8 meta-analysis.  
9

10  
11  
12  
13 **Design:** Systematic review and meta-analysis of published literature.  
14

15 **Data sources:** PubMed, Embase, the Cochrane Library, web of science of studies,  
16 China National Knowledge Index (CNKI) and Wan fang databases were searched up  
17 to August 2018.  
18  
19

20  
21 **Eligibility criteria:** Eligible articles comparing HFNC with COT in adult  
22 post-extubated surgical patients were included. The primary outcome was the  
23 intubation rate and escalation rate of respiratory support; the secondary outcome was  
24 incidence of postoperative pulmonary complications (PPCs) and mortality.  
25  
26  
27

28  
29 **Data extraction and synthesis:** two investigators extracted the data independently.  
30 We assessed internal validity using the risk of bias tool for RCTs according to the  
31 Cochrane Collaboration methodology and Newcastle-Ottawa scale to assess  
32 case-control or cohort study.  
33  
34  
35

36  
37 **Results:** Ten studies (1327 patients) were included. The pooled effect showed that  
38 HFNC significantly reduced the reintubation rate (risk ratio (RR) 0.31, 95% CI  
39 0.18-0.52,  $P < 0.0001$ ) and escalation rate of respiratory support (RR 0.43, 95% CI  
40 0.26-0.73,  $P = 0.002$ ), compared with COT. In addition, Weak evidence of a reduction  
41 of PPCs (RR 0.85, 95% CI 0.68-1.07,  $P = 0.17$ ) and mortality (RR 0.42, 95% CI  
42 0.15-1.17,  $P = 0.10$ ) with HFNC versus COT were revealed.  
43  
44  
45  
46  
47

48  
49 **Conclusions:** The results of current meta-analysis suggest that application of HFNC  
50 significantly reduce the reintubation rate and escalation rate of respiratory support,  
51 and have tendencies to reduce PPCs rate and mortality in postoperative post-extubated  
52 patients.  
53  
54  
55

56  
57  
58 **Key Words:** high flow nasal cannula; surgical patients; reintubation; escalation of  
59 respiratory support; mortality  
60

### Strengths and limitations of this study

- This is a meta-analysis comparing the effects of high flow nasal cannula oxygen therapy and conventional oxygen therapy on initial treatment failure, reintubation rate, PPC incidence, and mortality in postoperative patients.
- The possible risk of bias for RCTs, case-control and cohort study were assessed according to the Cochrane Collaboration methodology or Newcastle-Ottawa scale.
- Patients undergoing combined surgery (e.g., thoracoabdominal surgery) probably are a source of heterogeneity.
- Inclusion of non-randomized studies may be an important limitation of this paper; selection bias may confuse observations, so this meta-analysis uses RCT and non-RCT subgroup analysis to solve the problem.

## INTRODUCTION

Respiratory failure is the major complication in postoperative patient, which increases perioperative mortality, length of ICU and hospital stay, and also health care expenses <sup>1-2</sup>. The etiologies of early postoperative respiratory failure include hypoxemia, diaphragmatic dysfunction, atelectasis due to postoperative alveolar collapse or secretions accumulation etc. <sup>3-4</sup>. Several prophylactic managements have been proposed to reduce the incidence of postoperative pulmonary complications (PPCs) which could possibly reduce the necessity of reintubation and improve the prognosis of surgical patients, including protective intraoperative mechanical ventilation, postoperative physiotherapy and noninvasive mechanical ventilation (NIV) <sup>5</sup>. Although there is more evidence to support non-invasive ventilation for the treatment of postoperative respiratory failure <sup>6</sup>, this technique requires substantial resources and higher difficulty techniques to implement, and may cause discomfort to the patients <sup>7</sup>. High flow nasal cannula oxygen therapy (HFNC) is increasingly used in the prevention and treatment of respiratory failure in post-extubated non-surgical patients and surgical patients <sup>6-8-10</sup>. Several mechanisms of HFNC have been proposed and investigated compared with conventional oxygen therapy (COT), such as positive effects on comfort and tolerance, stable fraction of inspired oxygen delivery due to a reduction of room air entrainment, sufficient humidification, dead space wash-out and positive end expiratory pressure (PEEP) effect<sup>3 4 11 12 13 14</sup> All of these aspects may be valuable for postoperative patients. However, failure of HFNC may cause delayed intubation and worse clinical outcomes leading to higher mortality in patients with respiratory failure <sup>15</sup>. Therefore, whether HFNC can bring benefits in postoperative patients that has been attracting more and more attentions. Recently, several studies on this topic have been published, while the conclusions are inconsistent <sup>16-18</sup>. These considerations led us to conduct a meta-analysis comparing the effect of HFNC with conventional oxygen therapy on the escalation rate of respiratory support and intubation rate, and also the clinical outcomes in postoperative patients after extubation.

## METHODS

### Study selection

Two authors (Z-H.L., S-S.M.) assessed titles and abstracts independently to determine whether a study met the inclusion criteria. All trials were independently reviewed according to the inclusion and exclusion criteria. Any differences on the inclusion or exclusion of a particular study were resolved by consensus after a discussion with the third reviewer (W.C.).

### Data Sources and Searches

We searched PubMed, Embase, the Cochrane Library, web of science of studies, China National Knowledge Index (CNKI) and Wan fang databases from inception to August 31, 2018. We also searched the references from relevant articles in avoiding loss of studies. We used the following keywords for the searches: (“high flow” or “high-flow”) and (“operation” or “operative” or “surgery” or “Surgical”). No limits for the location of the original study, study design, conference abstract, gender, sample size, or language were entered for the search.

### Inclusion Criteria

To determine which publications were suitable for the meta-analysis, we used the following selection criteria: 1) study population was adult post-extubated surgical patients ( $\geq 18$  years); 2) compared HFNC with COT; 4) the data of respiratory support escalation or reintubation is required, or mortality was available; and 5) number of patients was provided in HFNC and COT groups.

### Exclusion Criteria

Exclusion criteria were as follows: 1) Patients who did not use HFNC after post-operative extubation; 2) the trial did not use conventional oxygen therapy as a control; 3) the study was a review, letter, case report, or other type of publication not based on original research; 4) in vitro study or animal experiments.

### Data extraction

Two investigators (X-W.Z., Z-H.L.) extracted the data independently. The primary outcome was the reintubation rate and the rate of respiratory support escalation (altered to HFNC, NIV or invasive mechanical ventilation in COT group; and NIV or invasive mechanical ventilation in HFNC group). The secondary outcomes were the incidence of PPCs ( which included: PPC diagnosed by original article, new postoperative pneumonia or atelectasis ) and mortality. Any disagreements between the two investigators were resolved by discussion and consensus with the third one (W.C.).

### Subgroup Analysis

For the primary and secondary outcomes, we performed the following a priori subgroup analyses: patients with different type of surgery (cardiac, thoracic and abdominal surgery); different risks of reintubation (high risk or low risk: the average values of risk-related parameters for reintubation were assessed according to Hernandez G's trials),<sup>9,10</sup> maintaining the different target percutaneous arterial oxygen saturation (SPO<sub>2</sub>:90%-93% and 95%) ,study design (Non-RCT or RCT) and strategy (prophylactic or therapy).

### Assessment of Risk of Bias

The possible risk of bias for RCTs was assessed according to the Cochrane Collaboration methodology<sup>19</sup>, which consists of the following domains: adequacy of sequence generation; allocation sequence concealment; blinding of participants and caregivers; blinding for outcome assessment; incomplete outcome data; selective outcome reporting; and the other sources of bias. To assess the possible risk of bias for case-control or cohort study, we adopted the Newcastle-Ottawa scale, which focused on three categories: selection, comparability, and exposure or outcome with each being awarded a maximum of nine stars on items <sup>20</sup>.



## Data Synthesis and Analysis

We used Review Manager Software (The Nordic Cochrane Center, The Cochrane Collaboration, Copenhagen Denmark) for the analysis. Categorical variables were presented as proportions or ratios, and compared by risk ratio (RR) with 95% confidence intervals (CIs). The statistical heterogeneity was measured and quantified by chi-square test and the  $I^2$  test. In addition,  $I^2$  index was used to assess heterogeneity in the meta-analysis with 25%, 50% and 75% of  $I^2$  values meaning low, medium and high heterogeneity, respectively proposed by Higgins and colleagues <sup>21</sup>. If the data heterogeneity is obvious ( $I^2 > 50\%$ ), we used the random effects model; otherwise, a fixed effects model was applied. Publication bias was evaluated by visual inspection of funnel plots. We considered a 2-tailed  $P$  value less than 0.05 as statistically significant.

## RESULTS

### Search Results, Trial Characteristics and quality

The selection process for the eligible studies is shown in Figure 1. Firstly, 4572 potentially relevant records were identified and 624 duplicates were excluded. Secondly, the titles and abstracts were screened for the terms “high flow nasal cannula”, “surgery” or the other operation”, 30 studies were remained for assessment. Finally, after searching and reading all full-text articles or conference abstracts, a total of 1327 patients in 10 trials were included, of which 615 patients were assigned to the HFNC group, and 712 to the COT group. The patients were followed-up until ICU or hospital discharge. The main characteristics of the included studies are shown in **Table 1**. The studies were published from 2013 to 2018 and conducted in Oceania, Europe, Asia and American with 3 cardiac surgery<sup>17 22 23</sup>, 5 thoracic surgery <sup>24-28</sup>, 1 abdominal surgery<sup>29</sup>, and 1 mixed patients<sup>16</sup> from different types of surgeries. Seven studies were RCTs, two were retrospective studies, and one was case-control study. The results of quality assessment were shown in **Table 2**.

Table1: Populations and interventions in studies of oxygen therapy in postoperative adults

| Study                 | Study design       | Type of surgery               | Patient characteristics (HFNC/COT) |       |        | Min target SPO2 (%) | Risk of reintubation | Flow rate(L/min) |
|-----------------------|--------------------|-------------------------------|------------------------------------|-------|--------|---------------------|----------------------|------------------|
|                       |                    |                               | Patient number                     | BMI   | Age    |                     |                      |                  |
| <b>Chen, 2018</b>     | Case-control study | Thoracic                      | 44/45                              | NA    | 66/64  | 90                  | High                 | 35-60            |
| <b>Xu, 2018</b>       | Retrospective      | Cardiovascular                | 45/45                              | 26/27 | 57/54  | 95                  | High                 | 35-60            |
| <b>Brainard, 2017</b> | RCT                | Thoracic                      | 18/26                              | 26/25 | 57/59  | 95                  | NA                   | 40               |
| <b>Dhillon, 2017</b>  | Retrospective      | Mixed                         | 46/138                             | NA    | 63/58  | NA                  | NA                   | NA               |
| <b>Geng, 2017</b>     | RCT                | Thoracic                      | 25/23                              | NA    | 63/63  | 90                  | High                 | 35-60            |
| <b>Sun, 2017</b>      | RCT                | Thoracic                      | 24/24                              | NA    | 67/65  | 100                 | High                 | 40-60            |
| <b>Yu, 2017</b>       | RCT                | Thoracic                      | 56/54                              | 26/25 | 56/56  | 95                  | High                 | 35-60            |
| <b>Futier, 2016</b>   | RCT                | Abdominal or combine thoracic | 108/112                            | 25/25 | 62/661 | 95                  | NA                   | 50-60            |
| <b>Corley, 2015</b>   | RCT                | Cardiovascular                | 81/74                              | 36/35 | 63/65  | 95                  | High                 | 35-50            |
| <b>Parke, 2013</b>    | RCT                | Cardiovascular                | 169/171                            | 28/29 | 65/66  | 93                  | High                 | 45               |

Data are expressed as median (interquartile range), or mean (standard deviation); NA, Not available or not reported

1  
2  
3  
4  
5  
6  
7  
8  
9  
10  
11  
12  
13  
14  
15  
16  
17  
18  
19  
20  
21  
22  
23  
24  
25  
26  
27  
28  
29  
30  
31  
32  
33  
34  
35  
36  
37  
38  
39  
40  
41  
42  
43  
44  
45  
46

**Table 2**

**Table 2a Quality assessment of RCTs included by the Cochrane collaboration tool**

| <b>Study</b>          | <b>Random sequence generation</b> | <b>Allocation concealment</b> | <b>Blinding of participants and personnel</b> | <b>Blinding of outcome assessment</b> | <b>Incomplete outcome data assessments</b> | <b>Selective reporting.</b> |
|-----------------------|-----------------------------------|-------------------------------|-----------------------------------------------|---------------------------------------|--------------------------------------------|-----------------------------|
| <b>Brainard, 2017</b> | Unclear                           | Low                           | High                                          | Unclear                               | Low                                        | Low                         |
| <b>Geng, 2017</b>     | Low                               | Unclear                       | High                                          | Unclear                               | Low                                        | Low                         |
| <b>Sun, 2017</b>      | Low                               | Low                           | High                                          | Low                                   | Low                                        | Unclear                     |
| <b>Yu, 2017</b>       | Unclear                           | Low                           | High                                          | Low                                   | Unclear                                    | Low                         |
| <b>Futier, 2016</b>   | Low                               | Low                           | High                                          | Unclear                               | Low                                        | Low                         |
| <b>Corley, 2015</b>   | Low                               | Low                           | High                                          | Low                                   | Low                                        | Low                         |
| <b>Parke, 2013</b>    | Low                               | Low                           | High                                          | Low                                   | Low                                        | Low                         |

Low; low risk of bias, High; high risk of bias, Unclear; unclear risk of bias according to the relative information

Table 2b Quality assessment of studies included by Newcastle-Ottawa scale

| Study         | Selection                                |                                     |                           |                                                                          | Comparability                                                   | Outcome               |                                                 |                                  | Overall stars |
|---------------|------------------------------------------|-------------------------------------|---------------------------|--------------------------------------------------------------------------|-----------------------------------------------------------------|-----------------------|-------------------------------------------------|----------------------------------|---------------|
|               | Representativeness of the exposed cohort | Selection of the non exposed cohort | Ascertainment of exposure | Demonstration that outcome of interest was not present at start of study | Comparability of cohorts on the basis of the design or analysis | Assessment of outcome | Was follow-up long enough for outcomes to occur | Adequacy of follow up of cohorts |               |
| Xu, 2018      | ★                                        | ★                                   | ★                         | ★                                                                        | ★                                                               | -                     | ★                                               | ★                                | 7             |
| Dhillon, 2017 | ★                                        | ★                                   | ★                         | ★                                                                        | ★                                                               | -                     | ★                                               | ★                                | 7             |

★ the quality met the criterion of this specific item; - Self-reported or unstated

Table 2c Quality assessment of studies included by Newcastle-Ottawa scale

| Study      | Selection                        |                                 |                       |                        | Comparability                                                              | Exposure                  |                                                     |                   | Overall stars |
|------------|----------------------------------|---------------------------------|-----------------------|------------------------|----------------------------------------------------------------------------|---------------------------|-----------------------------------------------------|-------------------|---------------|
|            | Is the case definition adequate? | Representativeness of the cases | Selection of Controls | Definition of Controls | Comparability of cases and controls on the basis of the design or analysis | Ascertainment of exposure | Same method of ascertainment for cases and controls | Non-Response rate |               |
| Chen, 2018 | ★                                | ★                               | -                     | ★                      | ★                                                                          | ★                         | ★                                                   | ★                 | 7             |

★ the quality met the criterion of this specific item; - Self-Hospital population control study or unstated

## Outcomes analyses

Nine studies reported the data of reintubation rate. 507 patients treated with HFNC and 600 patients received COT. The reintubation rate in the HFNC group was significantly lower compared with COT group (RR 0.31, 95% CI 0.18 to 0.52,  $P < 0.0001$ ,  $I^2 = 0\%$ ) (Figure 2, Table 3).

Escalation rate of respiratory support was reported in ten trials included 615 patients treated with HFNC and 712 patients received COT. The pooled results suggested that use of HFNC was associated with a significant reduction in escalation rate of respiratory support (RR 0.43, 95% CI 0.26 to 0.73,  $P = 0.002$ ,  $I^2 = 54\%$ ) with publication bias (Figure 3, Figure 4). There was significant heterogeneity among the pooled studies. Exclusion of study by Futier and colleagues<sup>18</sup> resolved the heterogeneity and the result was consistent (nine trials; RR 0.35, 95% CI 0.24 to 0.50,  $P < 0.00001$ ,  $I^2 = 0\%$ ).

Five studies reported the data of the incidence of PPCs. 252 patients treated with HFNC and 354 patients received COT. The incidence of PPC in the HFNC group has a downward trend than the COT group (RR 0.85, 95% CI 0.68 to 1.07,  $P = 0.1$ ,  $I^2 = 0\%$ ) (Figure 5a, Table 3).

Investigators reported the hospital mortality in 5 trials. Of the 422 patients treated with HFNC, 5 (1.18%) died in the hospital, compared with 19 of the 520 (3.65%) receiving COT. Evidently, Weak evidence of a reduction of mortality with HFNC versus COT was recorded (RR 0.42, 95% CI 0.15-1.17,  $P = 0.10$ ) (Figure 5b, Table 3).

The findings of the subgroup analyses for the primary and secondary outcomes of reintubation rate, escalation rate of respiratory support and mortality according to type of surgery, study design, min-target SPO<sub>2</sub>, risk of reintubation and therapy strategy are summarized in Table 3. For these outcomes, the analyses of intubation rate in thoracic surgery, RCT, Non-RCT, min target SPO<sub>2</sub> of 95%, high risk of reintubation, prophylactic and therapy subgroups, and also escalation rate of respiratory support in all subgroups except min target SPO<sub>2</sub> of 93% subgroup did not change significantly.

Table 3: Summary estimates of effect of high flow oxygen therapy in postoperative adults

| Outcome                                       | No studies (No of patients) | Summary estimate (95% CI) | P value (summary estimate) | P value (heterogeneity) | I <sup>2</sup> (%) |
|-----------------------------------------------|-----------------------------|---------------------------|----------------------------|-------------------------|--------------------|
| <b>Reintubation</b>                           | 9 (1107)                    | 0.31* (0.18 to 0.52)      | 0.0001                     | 0.53                    | 0                  |
| <b>Cardiac surgery</b>                        | 3 (585)                     | 0.41* (0.04 to 3.93)      | 0.44                       | 0.13                    | 51                 |
| <b>Thoracic surgery</b>                       | 5 (338)                     | 0.25* (0.12 to 0.50)      | 0.0001                     | 0.65                    | 0                  |
| <b>RCT</b>                                    | 6 (745)                     | 0.34* (0.15 to 0.74)      | 0.007                      | 0.31                    | 16                 |
| <b>Non-RCT</b>                                | 3 (362)                     | 0.28* (0.14 to 0.59)      | 0.0009                     | 0.59                    | 0                  |
| <b>Min target SPO2 (90%-93%)</b>              | 3 (476)                     | 0.33* (0.05 to 2.09)      | 0.24                       | 0.07                    | 62                 |
| <b>Min target SPO2 (95%)</b>                  | 4 (399)                     | 0.26* (0.08 to 0.84)      | 0.03                       | 0.71                    | 0                  |
| <b>High risk of reintubation</b>              | 7 (879)                     | 0.26* (0.14 to 0.49)      | 0.0001                     | 0.42                    | 1                  |
| <b>Escalation rate of respiratory support</b> | 10 (1327)                   | 0.43* (0.26 to 0.73)      | 0.002                      | 0.02                    | 54                 |

|                                  |          |                      |         |      |    |
|----------------------------------|----------|----------------------|---------|------|----|
| <b>Cardiac surgery</b>           | 3 (585)  | 0.43* (0.24 to 0.76) | 0.004   | 0.51 | 0  |
| <b>Thoracic surgery</b>          | 5 (404)  | 0.24* (0.14 to 0.39) | 0.00001 | 0.4  | 2  |
| <b>RCT</b>                       | 7 (965)  | 0.46* (0.22 to 0.93) | 0.03    | 0.01 | 64 |
| <b>Non-RCT</b>                   | 3 (362)  | 0.36* (0.20 to 0.66) | 0.001   | 0.60 | 0  |
| <b>Min target SPO2 (90%-93%)</b> | 3 (476)  | 0.38* (0.23 to 0.61) | 0.0001  | 0.34 | 8  |
| <b>Min target SPO2 (95%)</b>     | 5 (619)  | 0.46* (0.15 to 1.44) | 0.18    | 0.01 | 70 |
| <b>prophylactic</b>              | 7 (1143) | 0.50* (0.25 to 1.00) | 0.05    | 0.02 | 59 |
| <b>Therapy</b>                   | 3 (184)  | 0.31* (0.18 to 0.55) | 0.0001  | 0.45 | 0  |
| <b>High risk of reintubation</b> | 7 (879)  | 0.33* (0.22 to 0.49) | 0.00001 | 0.5  | 0  |
| <b>PPCs</b>                      | 5 (606)  | 0.85* (0.68 to 1.07) | 0.17    | 0.92 | 0  |
| <b>RCT</b>                       | 4 (422)  | 0.84* (0.67 to 1.06) | 0.14    | 0.83 | 0  |
| <b>prophylactic</b>              | 4 (558)  | 0.86* (0.68 to 1.08) | 0.20    | 0.87 | 0  |

|                                  |         |                       |      |      |   |
|----------------------------------|---------|-----------------------|------|------|---|
| <b>Mortality</b>                 | 5 (942) | 0.42* (0.15 to 1.17)  | 0.10 | 0.79 | 0 |
| <b>Cardiac surgery</b>           | 1 (340) | 1.01* (0.06 to 16.05) | 0.99 | -    | - |
| <b>Thoracic surgery</b>          | 2 (198) | 0.26* (0.03 to 2.25)  | 0.22 | -    | - |
| <b>RCT</b>                       | 3 (670) | 0.77* (0.17 to 3.41)  | 0.73 | 0.82 | 0 |
| <b>Non-RCT</b>                   | 2 (272) | 0.27* (0.06 to 1.18)  | 0.08 | 0.98 | 0 |
| <b>Min target SPO2 (90%-93%)</b> | 2 (428) | 0.41* (0.08 to 2.09)  | 0.29 | 0.45 | 0 |
| <b>Min target SPO2 (95%)</b>     | 2 (330) | 0.69* (0.12 to 4.06)  | 0.68 | -    | - |
| <b>High risk of reintubation</b> | 3 (538) | 0.41* (0.08 to 2.09)  | 0.29 | 0.45 | 0 |

RCT, randomized controlled trial; PPCs, postoperative pulmonary complications \*Relative risk



## DISCUSSION

The rationale for using HFNC in the postoperative patients depends mainly on whether HFNC can be an effective tool for treating or preventing PPCs and respiratory failure compared to conventional oxygen therapy. The results of the current systematic review and meta-analysis included 10 studies suggest that: 1) application of HFNC was associated with significant lower rate of respiratory support escalation and reintubation rate compared with COT in postoperative patients after extubation. 2) The trends of reduced PPCs and mortality were found in postoperative patients treated with HFNC. 3) HFNC did significantly reduce reintubation rate and initial treatment failure rate of patients after thoracic surgery or with high risk of reintubation. 4) HFNC may delay intubation in patients after cardiac surgery.

Although the results from this meta-analysis are encouraging, several important issues deserve a detailed discussion. First, there are important differences between previous research and this meta-analysis. Two systematic reviews used traditional pairwise comparisons to evaluate noninvasive respiratory support strategies in postoperative patients <sup>30 31</sup>. However, due to the small sample size of the two reviews (2 studies included 495 patients in Zhu's study, 3 studies included 715 postoperative patients in Huang's study,) the primary results included rate of respiratory support escalation and reintubation rate are inconsistent between them. This current meta-analysis included 10 studies (1327 patients), and the reintubation rate in our meta-analysis was consistent with that of postoperative subgroup patients in the Huang's study<sup>30</sup>, the result of respiratory support escalation rate was consistent with Zhu's study <sup>31</sup>. In addition, only cardiac surgery patients was enrolled in Huang's study, and their primary outcomes are similar to our subgroup analysis results, that is that HFNC can reduce the initial treatment failure rate without reducing the rate of reintubation, which indicates that HFNC may delay the intubation time without reducing the reintubation rate in cardiac surgery group. Kang's study found that failure to treat HFNC leads to intubation delay which may be associated with increased mortality <sup>15</sup>. Due to the small number of subgroup studies included in this meta-analysis,

1  
2  
3  
4 statistically significant results were not available in the analysis of mortality after  
5 cardiac surgery, which required more extensive studies to confirm.  
6

7  
8 Second, heterogeneity was observed among pooled studies in the primary outcome of  
9 respiratory support escalation rate. This is not surprising, given the differences in type  
10 of surgery, risks of reintubation, target SPO<sub>2</sub>, study design and therapeutic strategy.  
11  
12 Our sensitivity analyses and publication bias based on funnel plot showed that the trial  
13 by Futier and colleagues<sup>18</sup> probably contributed to the observed heterogeneity. Unlike  
14 other included trials, Futier and colleagues enrolled postoperative patients included  
15 patients undergoing combined thoracoabdominal surgery, longer follow-up time  
16 infection (7 days), and excluded surgical duration <2 hours and BMI  $\geq 25$  kg/m<sup>2</sup>;  
17 while duration of anesthesia and abdominal surgery are significant risk factors for  
18 postoperative pulmonary complications, which was associated with worse prognosis  
19 in patients<sup>32</sup>. After excluding this trial, the pooled result of the remaining studies still  
20 showed a reduction in initial treatment failure rate, which added robustness to our  
21 primary outcome.  
22  
23

24  
25 Third, the subgroup analysis of RCT suggested that HFNC could reduce intubation  
26 rate and respiratory support escalation rate, but not mortality, which is consistent with  
27 the overall analysis results. This effect might be attributed to better amenity, tolerance  
28 and more stable oxygen concentration of HFNC<sup>33</sup>. Subgroup analysis also showed  
29 that HFNC had a better effect on patients after thoracic surgery, which might be  
30 because HFNC increase the end-expiratory lung volume due to the provision of  
31 end-expiratory pressure (PEEP) effect, decrease airway resistance and reduce  
32 breathing work<sup>34-35</sup>; these effects can minimize partial lung retraction after  
33 extubation. Both RCT and non-RCT subgroups showed that HFNC has a positive  
34 effect on patients after postoperative extubation, whether it is prevention or treatment  
35 of respiratory failure.  
36  
37

38  
39 Fourth, HFNC can reduce reintubation rate compared with COT in patients with low  
40 risk of reintubation<sup>10</sup>, and is not inferior to NIV for preventing reintubation and  
41 post-extubated respiratory failure in patients at high risk of intubation<sup>9</sup>. We  
42 performed a subgroup analysis of high intubation risk and identified 7 studies as high  
43  
44  
45  
46  
47  
48  
49  
50  
51  
52  
53  
54  
55  
56  
57  
58  
59  
60

1  
2  
3  
4 intubation risk based on the low/high risk criteria for reintubation <sup>9-10</sup> , The results  
5 suggest that HFNC is also associated with lower rate of respiratory support escalation  
6 and reintubation rate in postoperative patients with high risk of reintubation.  
7

8  
9 Recent studies reported that among critically ill patients, conservative oxygen therapy  
10 (with a slightly lower SPO2 target) vs conventional therapy resulted in lower  
11 mechanical ventilation time, hospital or ICU mortality <sup>36-37</sup>. This meta-analysis  
12 showed that when SPO2 was maintained above 90%-93%, HFNC may reduce the rate  
13 of respiratory support without reducing the intubation rate; however, when  
14 maintaining SPO2 above 95%, the result is opposite to the former. Those indicate that  
15 although the rate of increase in respiratory support can be reduced at lower SPO2  
16 threshold vs the higher target SPO2, the time to reintubation is delayed, but we did not  
17 get the results of delaying intubation leading to poor prognosis like Kang's study<sup>15</sup> .  
18 This may be attributed to the inclusion of less research on mortality; more studies are  
19 needed to answer this question definitively.  
20  
21  
22  
23  
24  
25  
26  
27  
28  
29

30  
31 Postoperative low PPC incidence is associated with reduction of postoperative patient  
32 mortality <sup>38</sup>. Weak evidence suggests that HFNC can reduce incidence rate of PPCs  
33 and improve outcome in postoperative patients compared with COT, and mortality in  
34 HFNC group (1.18%) has a lower trend than COT (3.65%), and that may require a  
35 larger RCT study to confirm.  
36  
37  
38  
39

40  
41 Finally, to the best of our knowledge, this is the largest sample size meta-analysis to  
42 assess the efficacy of HFNC as a technique in intubation rate and rate of respiratory  
43 support in postoperative patients; however, our study has some limitations. Firstly,  
44 our meta-analysis showed that use of HFNC affect intubation rate and rate of  
45 respiratory support, but those outcomes may be weakened because not all of the  
46 included studies have them as the primary endpoint. Secondly, there were differences  
47 in the timing and duration of treatment for HFNC in the included trials. Third, the  
48 different assess respiratory risks in surgical patients in Catalonia (ARISCAT score) <sup>39</sup>  
49 were also different in the included studies, which may affect the outcomes.  
50  
51  
52  
53  
54  
55  
56  
57

## 58 **Conclusion**

59  
60

1  
2  
3  
4 In summary, based on available data, our results demonstrate that, compared with  
5 conventional oxygen therapy, HFNC might significantly reduce intubation rate and  
6 rate of respiratory support in adult postoperative patients, and the results also indicate  
7 a trend toward reduced mortality in postoperative patients with HFNC. This  
8 meta-analysis provides a good data base for the application of HFNC in postoperative  
9 patients.  
10  
11  
12  
13  
14  
15  
16

### 17 **Footnotes**

18  
19 **Contributors:** ZL and FG had full access to all the data in the study and take  
20 responsibility for its integrity and the accuracy of the data analysis. ZL, SM, and FG  
21 performed the systematic review, study selection, statistical analysis, and elaboration  
22 of the article for publication. WC, JX and XZ contributed to the data extraction and  
23 quality assessment. All the authors participated in the article writing and figure  
24 elaboration.  
25  
26  
27  
28  
29

30  
31 **Funding:** This study was supported partly by grants from the National Science and  
32 Technology Major Project (2017ZX10103004), Key Laboratory of Environmental  
33 Medicine Engineering of Ministry of Education, Southeast University; National  
34 Natural Science Foundation of China (grant numbers: 81670074, 81471843,  
35 81871602) and the projects of Jiangsu province's medical key discipline  
36 (ZDXKA2016025). The funding sources had no role in the design and conduct of the  
37 study; collection, management, analysis, and interpretation of the data; and  
38 preparation, review, or approval of the article.  
39  
40  
41  
42  
43  
44  
45

46 **Competing interests:** All the authors have disclosed that they do not have any  
47 potential conflicts of interest.  
48  
49

50 **Patient consent:** Not required.

51 **Provenance and peer review:** Not commissioned; externally peer reviewed.

52  
53 **Data sharing statement:** Data are available from the corresponding author on request  
54 fmguo2003@139.com  
55  
56  
57  
58  
59  
60

## References

1. Serpa Neto A, Hemmes SN, Barbas CS, et al. Incidence of mortality and morbidity related to postoperative lung injury in patients who have undergone abdominal or thoracic surgery: a systematic review and meta-analysis. *The Lancet Respiratory medicine* 2014;2(12):1007-15.
2. Melamed R, Boland LL, Normington JP, et al. Postoperative respiratory failure necessitating transfer to the intensive care unit in orthopedic surgery patients: risk factors, costs, and outcomes. *Perioperative medicine (London, England)* 2016;5:19.
3. Maggiore SM, Idone FA, Vaschetto R, et al. Nasal high-flow versus Venturi mask oxygen therapy after extubation. Effects on oxygenation, comfort, and clinical outcome. *American journal of respiratory and critical care medicine* 2014;190(3):282-8.
4. Ricard JD. High flow nasal oxygen in acute respiratory failure. *Minerva Anestesiol* 2012;78(7):836-41.
5. Ball L, Battaglini D, Pelosi P. Postoperative respiratory disorders. *Current opinion in critical care* 2016;22(4):379-85.
6. Stéphan F, Barrucand B, Petit P, et al. High-flow nasal oxygen vs noninvasive positive airway pressure in hypoxemic patients after cardiothoracic surgery: A randomized clinical trial. *JAMA - Journal of the American Medical Association* 2015;313(23):2331-39.
7. Ramirez A, Delord V, Khirani S, et al. Interfaces for long-term noninvasive positive pressure ventilation in children. *Intensive care medicine* 2012;38(4):655-62.
8. Zochios V, Collier T, Blandszun G, et al. The effect of high-flow nasal oxygen on hospital length of stay in cardiac surgical patients at high risk for respiratory complications: a randomised controlled trial. *Anaesthesia* 2018
9. Hernandez G, Vaquero C, Colinas L, et al. Effect of Postextubation High-Flow Nasal Cannula vs Noninvasive Ventilation on Reintubation and Postextubation Respiratory Failure in High-Risk Patients: A Randomized Clinical Trial. *Jama* 2016;316(15):1565-74.
10. Hernandez G, Vaquero C, Gonzalez P, et al. Effect of Postextubation High-Flow Nasal Cannula vs Conventional Oxygen Therapy on Reintubation in Low-Risk Patients: A Randomized Clinical Trial. *Jama* 2016;315(13):1354-61.
11. Corley A, Caruana LR, Barnett AG, et al. Oxygen delivery through high-flow nasal cannulae increase end-expiratory lung volume and reduce respiratory rate in post-cardiac surgical patients. *British journal of anaesthesia* 2011;107(6):998-1004.
12. Parke RL, McGuinness SP. Pressures delivered by nasal high flow oxygen during all phases of the respiratory cycle. *Respiratory care* 2013;58(10):1621-4.
13. Stephan F, Barrucand B, Petit P, et al. High-Flow Nasal Oxygen vs Noninvasive Positive Airway Pressure in Hypoxemic Patients After Cardiothoracic Surgery: A Randomized Clinical Trial. *Jama* 2015;313(23):2331-9.
14. Song HZ, Gu JX, Xiu HQ, et al. The value of high-flow nasal cannula oxygen therapy after extubation in patients with acute respiratory failure. *Clinics (Sao Paulo, Brazil)* 2017;72(9):562-67.
15. Kang BJ, Koh Y, Lim CM, et al. Failure of high-flow nasal cannula therapy may delay intubation and increase mortality. *Intensive care medicine* 2015;41(4):623-32.
16. Dhillon NK, Smith EJT, Ko A, et al. Extubation to high-flow nasal cannula in critically ill surgical patients. *The Journal of surgical research* 2017;217:258-64.
17. Parke R, McGuinness S, Dixon R, Jull A: Open-label, phase II study of routine high-flow nasal oxygen therapy in cardiac surgical patients. In *British journal of anaesthesia* 2013;925-931.

18. Futier E, Paugam-Burtz C, Godet T, et al. Effect of early postextubation high-flow nasal cannula vs conventional oxygen therapy on hypoxaemia in patients after major abdominal surgery: a French multicentre randomised controlled trial (OPERA). *Intensive care medicine* 2016;42(12):1888-98.
19. Higgins JP, Altman DG, Gotzsche PC, et al. The Cochrane Collaboration's tool for assessing risk of bias in randomised trials. *Bmj* 2011;343:d5928.
20. Stang A. Critical evaluation of the Newcastle-Ottawa scale for the assessment of the quality of nonrandomized studies in meta-analyses. *European journal of epidemiology* 2010;25(9):603-5.
21. Higgins JP, Thompson SG, Deeks JJ, et al. Measuring inconsistency in meta-analyses. *Bmj* 2003;327(7414):557-60.
22. Corley A, Bull T, Spooner AJ, et al. Direct extubation onto high-flow nasal cannulae post-cardiac surgery versus standard treatment in patients with a BMI  $\geq 30$ : a randomised controlled trial. *Intensive care medicine* 2015;41(5):887-94.
23. Xu XP, Gao YF, Zhang BB. Evaluation of the effects of precautionary high-flow oxygen therapy in patients undergoing tracheal intubation after stanford type A aortic dissection. *Chin J Nurs(China)* 2018;53:568-72.
24. Yu Y, Qian X, Liu C, et al. Effect of High-Flow Nasal Cannula versus Conventional Oxygen Therapy for Patients with Thoracoscopic Lobectomy after Extubation. 2017;2017:7894631.
25. Brainard J, Scott BK, Sullivan BL, et al. Heated humidified high-flow nasal cannula oxygen after thoracic surgery - A randomized prospective clinical pilot trial. *Journal of critical care* 2017;40:225-28.
26. Chen GJ, Xu HY, Pang H. Application of humidified high flow nasal cannula in respiratory failure patients post esophagectomy for esophageal cancer. *Chin J Crit Care(China)*;38:301-4.
27. Geng XH. Application of nasal high-flow humidification oxygen therapy system in patients with acute respiratory failure after cardiothoracic surgery. *Shandong Medical Journal (China)* 2016;56:94-6.
28. Sun T, Zhu HL. Clinical application of high-flow nasal cannula for the respiratory failure following radical resection of pulmonary carcinoma. *Chin J Prac Nurs(China)* 2017;33:2335-38.
29. Futier E, Paugam-Burtz C, Godet T, et al: Effect of early postextubation high-flow nasal cannula vs conventional oxygen therapy on hypoxaemia in patients after major abdominal surgery: a French multicentre randomised controlled trial (OPERA). In *Intensive care medicine* 2017;1888-1898.
30. Huang HW, Sun XM, Shi ZH, et al. Effect of High-Flow Nasal Cannula Oxygen Therapy Versus Conventional Oxygen Therapy and Noninvasive Ventilation on Reintubation Rate in Adult Patients After Extubation: A Systematic Review and Meta-Analysis of Randomized Controlled Trials. *Journal of intensive care medicine* 2017;885066617705118.
31. Zhu Y, Yin H, Zhang R, et al. High-flow nasal cannula oxygen therapy vs conventional oxygen therapy in cardiac surgical patients: A meta-analysis. *Journal of critical care* 2017;38:123-28.
32. Fernandez-Bustamante A, Frenzl G, Sprung J, et al. Postoperative Pulmonary Complications, Early Mortality, and Hospital Stay Following Noncardiothoracic Surgery: A Multicenter Study by the Perioperative Research Network Investigators. *JAMA surgery* 2017;152(2):157-66.
33. Papazian L, Corley A, Hess D, et al. Use of high-flow nasal cannula oxygenation in ICU adults: a narrative review. *Intensive care medicine* 2016;42(9):1336-49.
34. Testa G, Iodice F, Ricci Z, et al. Comparative evaluation of high-flow nasal cannula and conventional oxygen therapy in paediatric cardiac surgical patients: a randomized controlled trial. *Interactive cardiovascular and thoracic surgery* 2014;19(3):456-61.
35. Spoletini G, Alotaibi M, Blasi F, et al. Heated Humidified High-Flow Nasal Oxygen in Adults: Mechanisms of Action and Clinical Implications. *Chest* 2015;148(1):253-61.



- 1  
2  
3 36. Girardis M, Busani S, Damiani E, et al. Effect of Conservative vs Conventional Oxygen Therapy  
4 on Mortality Among Patients in an Intensive Care Unit: The Oxygen-ICU Randomized Clinical Trial.  
5 *Jama* 2016;316(15):1583-89.  
6  
7 37. Helmerhorst HJ, Schultz MJ, van der Voort PH, et al. Effectiveness and Clinical Outcomes of a  
8 Two-Step Implementation of Conservative Oxygenation Targets in Critically Ill Patients: A Before and  
9 After Trial. *Critical care medicine* 2016;44(3):554-63.  
10  
11 38. Boden I, Skinner EH, Browning L, et al. Preoperative physiotherapy for the prevention of  
12 respiratory complications after upper abdominal surgery: pragmatic, double blinded, multicentre  
13 randomised controlled trial. *BMJ (Clinical research ed)* 2018;360:j5916.  
14  
15 39. Canet J, Gallart L, Gomar C, et al. Prediction of postoperative pulmonary complications in a  
16 population-based surgical cohort. *Anesthesiology* 2010;113(6):1338-50.  
17  
18  
19

### 20 **Tables and Figures legend**

21  
22 Figure 1 Flow diagram (Preferred Reporting Items for Systematic Reviews and  
23 Meta-Analyses) of trial selection

24  
25 Figure 2 Reintubation rate in post-extubated surgical patients with high-flow nasal  
26 cannula oxygen therapy (HFNC) versus conventional oxygen therapy (COT).  
27

28  
29 Figure 3 Rate of respiratory support escalation in post-extubated surgical patients with  
30 high-flow nasal cannula oxygen therapy (HFNC) versus conventional oxygen therapy  
31 (COT).  
32  
33

34  
35 Figure 4 Funnel plot for publication bias of comparing high-flow nasal cannula  
36 oxygen therapy (HFNC) with conventional oxygen therapy (COT) for the rate of  
37 respiratory support escalation in postoperative patients.  
38  
39

40  
41 Figure 5a Postoperative pulmonary complications in post-extubated surgical patients  
42 with high-flow nasal cannula oxygen therapy (HFNC) versus conventional oxygen  
43 therapy (COT).  
44  
45

46  
47 Figure 5b Hospital mortality in post-extubated surgical patients with high-flow nasal  
48 cannula oxygen therapy (HFNC) versus conventional oxygen therapy (COT) .  
49

50  
51 Table 1: Populations and interventions in studies of oxygen therapy in postoperative  
52 adults

53 Table 2: The quality assessment of included studies

54  
55 Table 3: Summary estimates of effect of high flow oxygen therapy in postoperative  
56 adults  
57  
58  
59  
60

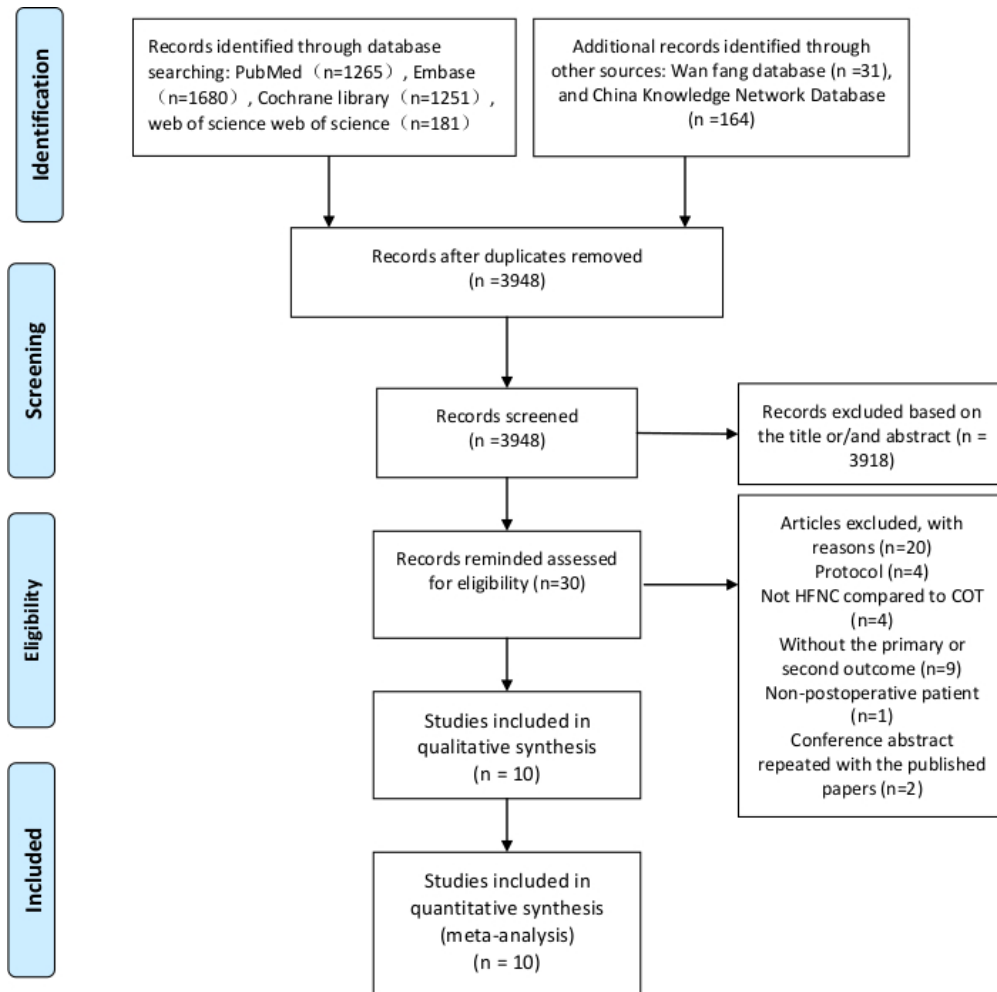

Flow diagram of study selection

59x58mm (300 x 300 DPI)



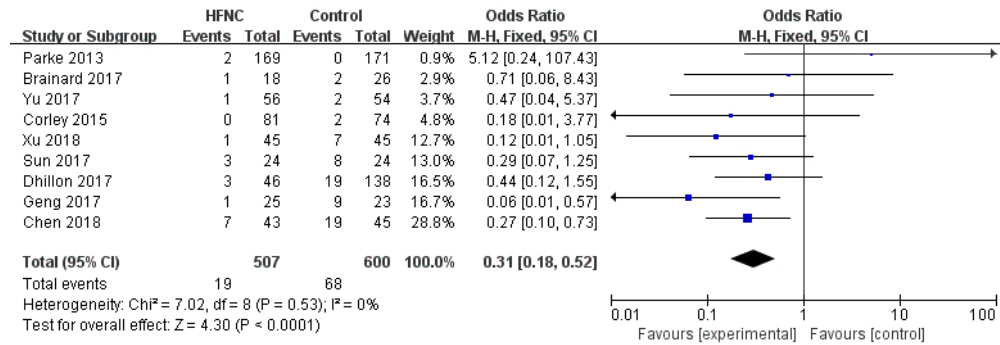

Reintubation rate in post-extubated surgical patients with high-flow nasal cannula oxygen therapy (HFNC) versus conventional oxygen therapy (COT).

65x23mm (300 x 300 DPI)

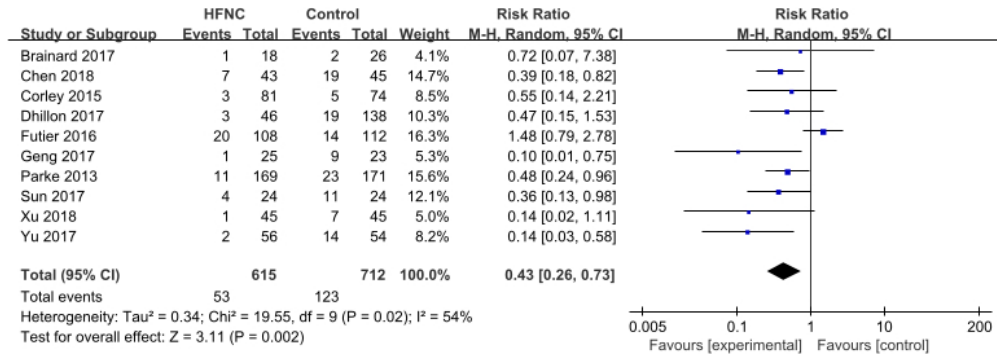

Rate of respiratory support escalation in post-extubated surgical patients with high-flow nasal cannula oxygen therapy (HFNC) versus conventional oxygen therapy (COT).

65x22mm (300 x 300 DPI)

1  
2  
3  
4  
5  
6  
7  
8  
9  
10  
11  
12  
13  
14  
15  
16  
17  
18  
19  
20  
21  
22  
23  
24  
25  
26  
27  
28  
29  
30  
31  
32  
33  
34  
35  
36  
37  
38  
39  
40  
41  
42  
43  
44  
45  
46  
47  
48  
49  
50  
51  
52  
53  
54  
55  
56  
57  
58  
59  
60

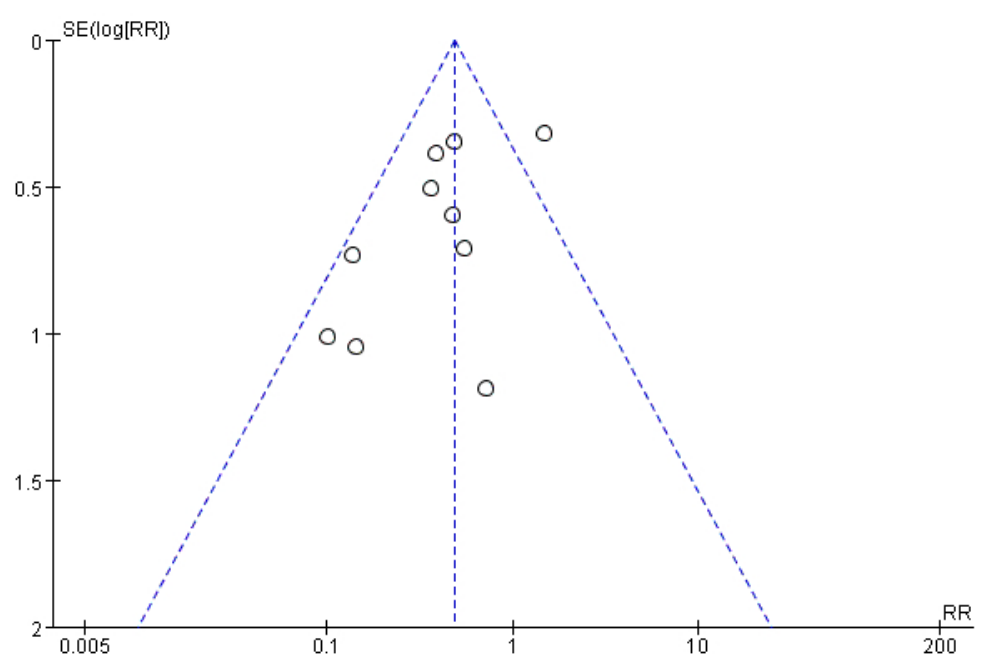

Funnel plot for publication bias of comparing high-flow nasal cannula oxygen therapy (HFNC) with conventional oxygen therapy (COT) for the rate of respiratory support escalation in postoperative patients.

50x33mm (300 x 300 DPI)

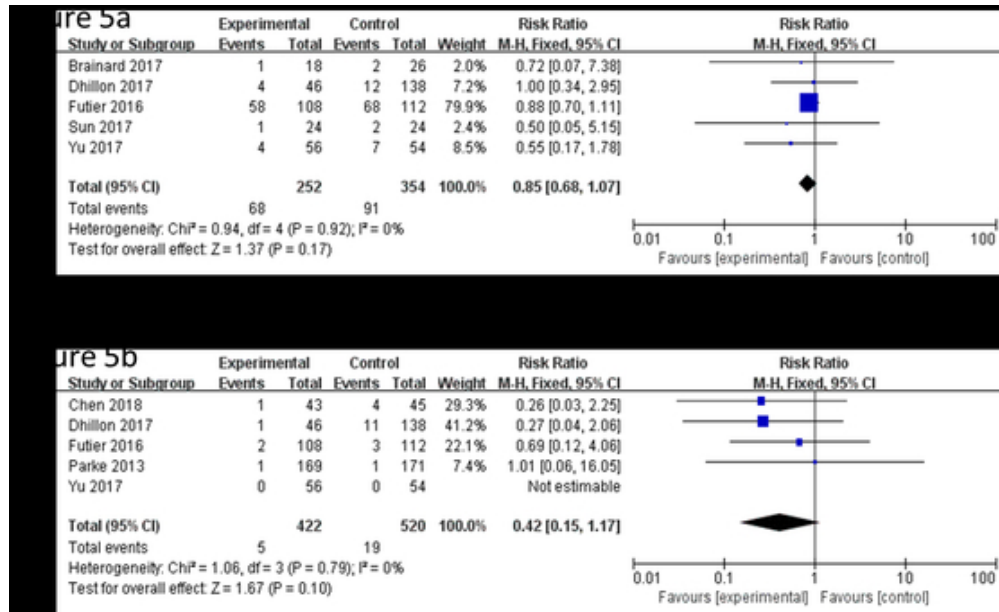

Figure 5a Postoperative pulmonary complications in post-extubated surgical patients with high-flow nasal cannula oxygen therapy (HFNC) versus conventional oxygen therapy (COT).  
 Figure 5b Hospital mortality in post-extubated surgical patients with high-flow nasal cannula oxygen therapy (HFNC) versus conventional oxygen therapy (COT) .

47x28mm (300 x 300 DPI)

# BMJ Open

## The effect of high-flow nasal cannula oxygen therapy compared with conventional oxygen therapy in postoperative patients: a systematic review and meta-analysis

|                                 |                                                                                                                                                                                                                                                                                                                                                                                                                                                                                                                                                                                                                                                                                                                                                                                                                                                                                                                                                                                          |
|---------------------------------|------------------------------------------------------------------------------------------------------------------------------------------------------------------------------------------------------------------------------------------------------------------------------------------------------------------------------------------------------------------------------------------------------------------------------------------------------------------------------------------------------------------------------------------------------------------------------------------------------------------------------------------------------------------------------------------------------------------------------------------------------------------------------------------------------------------------------------------------------------------------------------------------------------------------------------------------------------------------------------------|
| Journal:                        | <i>BMJ Open</i>                                                                                                                                                                                                                                                                                                                                                                                                                                                                                                                                                                                                                                                                                                                                                                                                                                                                                                                                                                          |
| Manuscript ID                   | bmjopen-2018-027523.R1                                                                                                                                                                                                                                                                                                                                                                                                                                                                                                                                                                                                                                                                                                                                                                                                                                                                                                                                                                   |
| Article Type:                   | Research                                                                                                                                                                                                                                                                                                                                                                                                                                                                                                                                                                                                                                                                                                                                                                                                                                                                                                                                                                                 |
| Date Submitted by the Author:   | 23-Apr-2019                                                                                                                                                                                                                                                                                                                                                                                                                                                                                                                                                                                                                                                                                                                                                                                                                                                                                                                                                                              |
| Complete List of Authors:       | Lu, Zhonghua; Department of Critical Care Medicine, Zhongda Hospital, School of Medicine, Southeast University<br>Chang, Wei; Zhongda Hospital, School of Medicine, Southeast University, Department of Critical Care Medicine<br>Meng, Shan-Shan; Zhongda Hospital, School of Medicine, Southeast University, Department of Critical Care Medicine<br>Zhang, Xiwen; Zhongda Hospital, School of Medicine, Southeast University<br>Xie, Jianfeng; School of Medicine, Southeast University, Critical Care Medicine;<br>Xu, Jing-Yuan; Zhongda Hospital, School of Medicine, Southeast University, Department of Critical Care Medicine<br>Qiu, Haibo; Zhongda Hospital, School of Medicine, Southeast University<br>Yang, Yi; Zhongda Hospital, School of Medicine, Southeast University, Department of Critical Care Medicine<br>Guo, Fengmei; Department of Critical Care Medicine, Zhongda Hospital, School of Medicine, Southeast University, Zhongda Hospital, Southeast University |
| <b>Primary Subject Heading</b>: | Intensive care                                                                                                                                                                                                                                                                                                                                                                                                                                                                                                                                                                                                                                                                                                                                                                                                                                                                                                                                                                           |
| Secondary Subject Heading:      | Respiratory medicine, Surgery, Intensive care, Anaesthesia                                                                                                                                                                                                                                                                                                                                                                                                                                                                                                                                                                                                                                                                                                                                                                                                                                                                                                                               |
| Keywords:                       | high flow nasal cannula, surgical patients, reintubation, escalation of respiratory support, pulmonary complications                                                                                                                                                                                                                                                                                                                                                                                                                                                                                                                                                                                                                                                                                                                                                                                                                                                                     |
|                                 |                                                                                                                                                                                                                                                                                                                                                                                                                                                                                                                                                                                                                                                                                                                                                                                                                                                                                                                                                                                          |

SCHOLARONE™  
Manuscripts

1  
2  
3  
4 1 **The effect of high-flow nasal cannula oxygen therapy compared with**  
5 2 **conventional oxygen therapy in postoperative patients: a systematic review and**  
6 3  
7 4  
8 5  
9 6  
10 7  
11 8  
12 9  
13 10  
14 11  
15 12  
16 13  
17 14  
18 15  
19 16  
20 17  
21 18  
22 19  
23 20  
24 21  
25 22  
26 23  
27 24  
28 25  
29 26  
30 27  
31 28  
32 29  
33 30  
34 31  
35 32  
36 33  
37 34  
38 35  
39 36  
40 37  
41 38  
42 39  
43 40  
44 41  
45 42  
46 43  
47 44  
48 45  
49 46  
50 47  
51 48  
52 49  
53 50  
54 51  
55 52  
56 53  
57 54  
58 55  
59 56  
60 57

**meta-analysis**

5 Zhonghua Lu, MD<sup>1</sup>; Wei Chang; MD<sup>1</sup>, Shanshan Meng, MD<sup>1</sup>; Xiwen Zhang, MD<sup>1</sup>;  
6 Jianfeng Xie, MD<sup>1</sup>; Jingyuan Xu, MD<sup>1</sup>; Haibo Qiu, MD, PHD<sup>1</sup>; Yi Yang, MD, PHD  
7 <sup>1</sup>; Fengmei Guo, MD, PHD<sup>1</sup>

9 Corresponding author:

10 Fengmei Guo

11 Tel: +86-25-83272200;

12 Fax: +86-25-83272011;

13 Zhongda Hospital, Southeast University, 87 Dingjia Bridge, Hunan Road, Gu Lou

14 District, 210009, Nanjing, China

15 Email: fmguo2003@139.com

17 The authors' affiliations are as follows:

18 <sup>1</sup>Department of Critical Care Medicine, Zhongda Hospital, School of Medicine,  
19 Southeast University, Nanjing, China

21 Email addresses of the authors:

22 Zhonghua Lu: luzhonghua077@126.com

23 Wei Chang: ewei\_0181@126.com

24 Shanshan Meng: mengshanshan0101@163.com

25 Xiwen Zhang: xiwen\_zhang@126.com

26 Jianfeng Xie: xie820405@126.com

27 Jingyuan Xu: xujingyuanmail@163.com

28 Haibo Qiu: haiboq2000@163.com

29 Yi Yang: yiyiyang2004@163.com

30 Fengmei Guo: fmguo2003@139.com

1 **Objective:** To evaluate the effect of high flow nasal cannula oxygen therapy (HFNC)  
2 vs. conventional oxygen therapy (COT) on the re-intubation rate, rate of escalation of  
3 respiratory support and clinical outcomes in post-extubation adult surgical patients.

4 **Design:** Systematic review and meta-analysis of published literature.

5 **Data sources:** PubMed, Embase, the Cochrane Library, Web of Science, China  
6 National Knowledge Index (CNKI) and Wan fang databases were searched up to  
7 August 2018.

8 **Eligibility criteria:** Studies in postoperative adult surgical patients ( $\geq 18$  years);  
9 Receiving HFNC or COT applied immediately after extubation that reported  
10 re-intubation, escalation of respiratory support, postoperative pulmonary  
11 complications (PPCs), and mortality were eligible for inclusion.

12 **Data extraction and synthesis:** The following data was extracted from the included  
13 studies: first author's name, year of publication, study population, country of origin,  
14 study design, number of patients, patients' baseline characteristics, and outcomes.  
15 Associations were evaluated using relative risks (RRs) and 95% confidence intervals  
16 (CIs).

17 **Results:** This meta-analysis included 10 studies (1327 patients). HFNC significantly  
18 reduced the re-intubation rate (risk ratio (RR) 0.38, 95% CI 0.23-0.61,  $P < 0.0001$ ) and  
19 rate of escalation of respiratory support (RR 0.43, 95% CI 0.26-0.73,  $P = 0.002$ ) in  
20 post-extubation surgical patients compared to COT. There were no differences in the  
21 incidence of PPCs (RR 0.87, 95% CI 0.70-1.08,  $P = 0.21$ ) or mortality (RR 0.45, 95%  
22 CI 0.16-1.29,  $P = 0.14$ ).

23 **Conclusions:** HFNC is associated with a significantly lower re-intubation rate and  
24 rate of escalation of respiratory support compared to COT in post-extubation adult  
25 surgical patients, but there is no difference in the incidence of PPCs or mortality.  
26 More well-designed, large randomized controlled trials are needed to determine the  
27 subpopulation of patients who are most likely to benefit from HFNC therapy.

28

1  
2  
3  
4 1 **Key Words:** high flow nasal cannula; surgical patients; re-intubation; escalation of  
5  
6 2 respiratory support; mortality  
7  
8 3  
9 4

10 4  
11 5 **Strengths and limitations of this study**

12  
13 6 ➤ This meta-analysis synthesized data from randomized trials and observational  
14  
15 7 studies to analyze the effect of high flow nasal cannula oxygen therapy (HFNC)  
16  
17 8 versus conventional oxygen therapy (COT) on re-intubation rate, rate of  
18  
19 9 escalation of respiratory support and incidence of PPCs and mortality in  
20  
21 10 post-extubation surgical patients.

22  
23 11 ➤ The possible risk of bias for RCTs and case-control and cohort studies were  
24  
25 12 assessed using Cochrane Collaboration methodology or the Newcastle-Ottawa  
26  
27 13 scale.

28  
29 14 ➤ Sources of heterogeneity between studies were investigated using random-effects  
30  
31 15 meta-regression. Subgroup analyses were conducted to investigate the  
32  
33 16 subpopulation of patients who were most likely to benefit from HFNC therapy.  
34  
35 17  
36  
37 18



## 1 INTRODUCTION

2 Postoperative respiratory failure is associated with perioperative morbidity and  
3 mortality in surgical patients, and high costs of healthcare <sup>1 2</sup>. Causes of early  
4 postoperative respiratory failure include hypoxemia, diaphragmatic dysfunction,  
5 atelectasis due to postoperative alveolar collapse, or fluid accumulation<sup>3–4</sup>.  
6 Prophylactic strategies such as protective intraoperative mechanical ventilation,  
7 postoperative physiotherapy, and noninvasive mechanical ventilation (NIV) may  
8 reduce the incidence of postoperative pulmonary complications (PPCs) and improve  
9 the prognosis of surgical patients<sup>5</sup>. In particular, some evidence supports the use of  
10 NIV for postoperative respiratory failure <sup>6</sup>; however, this technique requires  
11 substantial resources and technical expertise, and may cause discomfort to patients <sup>7</sup>.

12 High flow nasal cannula oxygen therapy (HFNC) is increasingly used in the  
13 prevention and treatment of respiratory failure in post-extubation non-surgical and  
14 surgical patients<sup>6–8 9</sup>. The advantages of HFNC compared to conventional oxygen  
15 therapy (COT) include improved comfort, delivery of a predictable sustained partial  
16 pressure of oxygen due to a reduction of room air entrainment, good humidification,  
17 decreased anatomical dead space, and positive end expiratory pressure (PEEP)<sup>3 4 10–12 3</sup>  
18 <sup>4 11 12 13 14</sup>. However, failure of HFNC in patients with pulmonary complications can  
19 lead to delayed intubation causing morbidity and mortality<sup>15</sup>. Therefore, the safety and  
20 efficacy of HFNC is being increasingly investigated in the literature, but findings are  
21 inconsistent <sup>16–18</sup>. In an attempt to provide some clarity, the present systematic review  
22 and meta-analysis evaluated the effect of HFNC vs. COT on the re-intubation rate,  
23 rate of escalation of respiratory support, and clinical outcomes in post-extubation  
24 adult surgical patients.

## 25 METHODS

### 26 Data Sources and Searches

27 The PubMed, Embase, Cochrane Library, Web of Science, China National  
28 Knowledge Index (CNKI) and Wan fang databases were searched from inception to  
29 August 31, 2018 using the following keywords: (“high flow” or “high-flow”) and  
30

1 (“operation” or “operative” or “surgery” or “Surgical”). Additional studies were identified by manually searching the reference lists from relevant articles and reviews. No restrictions on language or study design were applied.

#### **Inclusion and Exclusion Criteria**

Inclusion criteria were: 1) study population: postoperative adult surgical patients ( $\geq$  18 years); 2) interventions: HFNC vs. COT; HFNC or COT were applied immediately after extubation; COT was administered via a cool mist/nasal cannula (CM/NC) or face mask; and 3) outcomes: re-intubation, escalation of respiratory support, PPCs and mortality.

Exclusion criteria were: 1) Studies in postoperative surgical patients who did not receive HFNC after extubation; 2) use of a control other than COT; 3) reviews, letters, case reports; or 4) in vitro studies or animal experiments.

#### **Study selection**

Two review authors (Z-H.L., S-S.M.) independently assessed titles and abstracts to determine if a study met the inclusion criteria. The full text of potentially relevant studies was retrieved and reviewed. Disagreements about study selection were resolved through discussion with a third reviewer (W.C.) until consensus was reached.

#### **Data extraction**

Two review authors (Z-H.L., S-S.M.) independently extracted data from the included studies, including first author’s name, year of publication, study population, country of origin, study design, number of patients, patients’ baseline characteristics, and outcomes.

Primary outcomes were re-intubation rate and rate of escalation of respiratory support. In post-extubation adult surgical patients receiving COT, respiratory support was escalated to HFNC, NIV or invasive mechanical ventilation (IMV) according to the following algorithms: COT  $\rightarrow$  HFNC, COT  $\rightarrow$  NIV, COT  $\rightarrow$  HFNC  $\rightarrow$  IMV, COT  $\rightarrow$  NIV  $\rightarrow$  IMV. In post-extubation adult surgical patients receiving HFNC, respiratory support was escalated to NIV or IMV according to the following algorithms: HFNC

1 →NIV, HFNC→IMV, HFNC→NIV→IMV. Respiratory therapy was escalated when  
2 the patient progressed to acute respiratory failure or due to other causes.

3 Secondary outcomes were the incidence of PPCs, defined as PPCs identified in  
4 the original article, new postoperative pneumonia and atelectasis, and in hospital or  
5 28-day mortality. Disagreements about data extraction were resolved through  
6 discussion with a third reviewer (W.C.) until consensus was reached.

### 7 **Assessment of Risk of Bias**

8 Risk of bias in included RCTs was assessed using Cochrane Collaboration  
9 methodology<sup>19</sup>, which evaluates the following domains: adequacy of sequence  
10 generation; allocation sequence concealment; blinding of participants and caregivers;  
11 blinding for outcome assessment; incomplete outcome data; selective outcome  
12 reporting; and the other sources of bias. Risk of bias was evaluated as 'low risk', 'high  
13 risk, or 'unclear risk', Risk of bias in included case-control or cohort studies was  
14 assessed using a modified Newcastle-Ottawa scale, which includes three categories:  
15 selection, comparability, and exposure or outcome, with each study awarded a  
16 maximum of nine stars <sup>20</sup>.

### 17 **Statistical Analysis**

18 Statistical analysis was performed with Review Manager Software 5.3 (The Nordic  
19 Cochrane Center, The Cochrane Collaboration, Copenhagen Denmark) and STATA  
20 12.0 (Stata Corporation, College Station, TX, USA). Categorical variables are  
21 presented as proportions or ratios, and associations were evaluated using relative risks  
22 (RRs) and 95% confidence intervals (CIs). A random effects model was used to pool  
23 studies to account for the substantial clinical heterogeneity (patients' age, type of  
24 surgery, types of controls [CM/NC or face mask], length of follow-up) between  
25 studies.

26 Heterogeneity between studies was quantified by the chi-square and  $I^2$  tests.  
27 Heterogeneity between studies was assessed as low ( $I^2=25%$ ), medium ( $I^2=50%$ ) or  
28 high ( $I^2=75%$ )<sup>21</sup>. Univariable random-effects meta-regression was performed to  
29 investigate sources of heterogeneity between studies.

1  
2  
3  
4 1 Subgroup analyses were conducted to investigate the subpopulation of patients  
5 2 who were most likely to benefit from HFNC therapy. Subgroups were stratified by  
6 3 type of surgery (cardiac, thoracic or mixed surgery), study design (non-RCT or RCT),  
7 4 target SPO<sub>2</sub> level (90%-93% or 95%), strategy (prophylactic or therapy), and risk of  
8 5 re-intubation (high risk or low risk: the average values of risk-related parameters for  
9 6 re-intubation were assessed as previously reported <sup>9,10</sup>).

7 Sensitivity analysis, excluding one study at a time, was performed to explore the  
8 impact of study quality on the overall effect estimate of all included studies.

9 Publication bias was evaluated by Begg's funnel plot with pseudo 95%  
10 confidence limits.

11 The level of evidence of included studies was qualified using the  
12 GRADE (Grading of Recommendations, Assessment, Development and Evaluations)  
13 framework.

14 A 2-tailed *P* value <0.05 was considered statistically significant.

### 15 **Patient and public involvement statement**

16 Patients and the public were not involved in this review.

### 17 **RESULTS**

18 The searches identified 4572 potentially relevant articles, and 624 duplicates were  
19 excluded. After reviewing titles and abstracts, 30 studies were considered potentially  
20 eligible for inclusion. After analyzing the full text articles or conference abstracts, 10  
21 studies were included in the final analyses (**Figure 1**)

22 The characteristics of the included studies are shown in **Table 1**. The studies were  
23 published between 2013 and 2018 and were conducted in Oceania, Europe, Asia and  
24 American. Seven studies were RCTs, two were case-control studies, and one was a  
25 cohort study. The 10 studies included a total of 1327 post-extubation adult surgical  
26 patients, of which 615 patients received HFNC, and 712 received COT. Three studies  
27 were in patients who had undergone cardiac surgery <sup>17 22 23</sup>, 5 studies were in patients  
28 who had undergone thoracic surgery <sup>24-28</sup>, and 2 studies were mixed, including  
29 patients<sup>16,29</sup> who had undergone various types of surgeries. The patients were  
30 followed-up until ICU or hospital discharge.

## 1 **Assessment of Risk of Bias**

2 The results of the quality assessments are shown in **Figure 2A** and **Table 2**. None of  
3 the included studies were double blind. In the RCTs, blinding of patients and  
4 caregivers was impossible, and most authors regarded this as a limitation associated  
5 with their studies. One trial had reporting bias. Four trials were classified as having an  
6 unclear risk of bias <sup>24,25,27,28</sup>.

7 All the non-RCTs received seven stars on the modified Newcastle-Ottawa scale,  
8 because the assessment of outcomes were self-reported or unstated in the cohort  
9 study, and the selection of controls was not described in the case-control studies.

10 Begg's funnel plot revealed no evidence of publication bias for the primary  
11 outcomes, except for one outlier in the analysis of escalation of respiratory support<sup>18</sup>  
12 (**Figure 2B, 2C**).

## 13 **Outcomes**

### 14 *Primary outcomes*

15 Nine studies reported on the re-intubation rate in post-extubation adult surgical  
16 patients who received HFNC (n=507) or COT (n=600). The meta-analysis  
17 demonstrated that the re-intubation rate was significantly lower in patients who  
18 received HFNC compared to those who received COT (RR 0.38, 95% CI 0.23-0.61,  $P$   
19  $<0.0001$ ). There was no evidence of heterogeneity between studies ( $I^2 = 0\%$ )  
20 (**Figure 3**).

21 Ten studies reported on the rate of escalation of respiratory support in  
22 post-extubation adult surgical patients who received HFNC (n=615) or COT (n=712).  
23 The meta-analysis demonstrated that the rate of escalation of respiratory support was  
24 significantly lower in patients who received HFNC compared to those who received  
25 COT (RR 0.43, 95% CI 0.26 to 0.73,  $P = 0.002$ ). There was evidence of heterogeneity  
26 between studies ( $I^2 = 54\%$ ) (**Figure 4**).

### 27 *Secondary outcomes*

28 Five studies reported on the incidence of PPCs in post-extubation adult surgical  
29 patients who received HFNC (n=252) or COT (n=354). The meta-analysis  
30 demonstrated no significant difference in the incidence of PPCs in patients who

1  
2  
3  
4 1 received HFNC compared to those who received COT (RR 0.87, 95% CI 0.70-1.08,  
5  
6 2  $p=0.21$ ). There was no evidence of heterogeneity between studies ( $I^2 = 0\%$ ) (**Figure**  
7  
8 3 **5A**).

9  
10 4 Five studies reported on mortality in post-extubation adult surgical patients who  
11  
12 5 received HFNC (n=422) or COT (n=520). 5 patients (1.18%) who received HFNC and  
13  
14 6 19 patients who received COT, died. However, the meta-analysis demonstrated no  
15  
16 7 significant difference in mortality in patients who received HFNC compared to those  
17  
18 8 who received COT (RR 0.45, 95% CI 0.16-1.29,  $P=0.14$ ) (**Figure 5B**).

### 9 ***Subgroup analyses***

10 Subgroup analyses stratified by type of surgery (cardiac, thoracic or mixed surgery),  
11  
12 11 study design (non-RCT or RCT), target SPO2 level (90%-93% or 95%), strategy  
13  
14 12 (prophylactic or therapy), and risk of re-intubation (high risk or low risk) showed  
15  
16 13 similar effect estimates for the primary and secondary outcomes as the overall  
17  
18 14 analysis (**Table 3**), except for cardiac surgery, prophylactic strategy and target SPO2  
19  
20 15 level (90-93%), where there was no significant difference in the re-intubation rate in  
21  
22 16 post-extubation adult surgical patients who received HFNC compared to those who  
23  
24 17 received COT, and target SPO2 level (95%), where there was no significant  
25  
26 18 difference in the rate of escalation of respiratory support in post-extubation adult  
27  
28 19 surgical patients who received HFNC compared to those who received COT.

### 20 ***Random-effects meta-regression***

21 Meta-regression was used to analyze the sources of heterogeneity between studies in  
22  
23 21 the analyses investigating the rate of escalation of respiratory support. Type of surgery  
24  
25 22 (b = 0.262,  $P = 0.027$ ) and risk factors for intubation (b = 2.358,  $P = 0.006$ ) were  
26  
27 23 found to be a potential source heterogeneity (**Supplementary Figure 1**).

### 25 ***Sensitivity Analysis***

26 Sensitivity analyses excluding one study at a time showed similar effect estimates for  
27  
28 26 the primary and secondary outcomes as the overall analysis (**Supplementary Figure**  
29  
30 27 **2**).

### 29 **GRADE**

1 Evidence was qualified using GRADE. Overall, high quality evidence showed that  
2 HFNC may have benefit when compared to COT in reducing the re-intubation rate in  
3 post-extubation adult surgical patients; however, the level of evidence for the case  
4 control study was low (**Supplementary Table 1A**).

5 Overall, low quality of evidence showed that HFNC may have benefit when  
6 compared to COT in reducing the need to escalate respiratory support in  
7 post-extubation adult surgical patients. The level of evidence for RCTs was  
8 downgraded due to medium heterogeneity between studies, uncertain publication bias,  
9 and the level of evidence for the case control group was low due to factors associated  
10 with study design (**Supplementary Table 1B**).

## 11 12 **DISCUSSION**

13 The results from the present systematic review and meta-analysis of data from 10  
14 studies suggest that HFNC is associated with a significantly lower re-intubation rate  
15 and rate of escalation of respiratory support compared to COT in post-extubation  
16 adult surgical patients, but there is no difference in the incidence of PPCs or mortality.  
17 Subgroup analysis showed that HFNC reduced the re-intubation rate and the rate of  
18 escalation of respiratory support compared to COT in both randomized controlled  
19 trials and observational studies. These data suggest that the beneficial effects of  
20 HFNC, including washout of anatomic dead space, improved gas mixing in large  
21 airways, heating and humidification of inhaled gas, increased end-expiratory lung  
22 volume, improved oxygenation and reduced respiratory rate and inspiratory effort <sup>30-34</sup>  
23 are consistent across healthcare settings and treatment strategies.

24 Previous studies have investigated the safety and efficacy of HFNC in surgical  
25 and non-surgical patients. Two systematic reviews used traditional pairwise  
26 comparisons to evaluate the effectiveness of HFNC and COT in post-extubation adult  
27 patients <sup>35 36</sup>. In a meta-analysis including 2 studies and 495 cardiac surgical patients,  
28 Zhu et al found that HFNC after extubation was associated with a significant  
29 reduction in the rate of escalation of respiratory support compared to COT, but did not  
30 decrease re-intubation rate or the length of intensive care unit stay <sup>36</sup>. In a

10



1  
2  
3  
4 1 meta-analysis including 7 studies and 2781 adult patients, HFNC after extubation had  
5 2 a similar re-intubation rate compared to either COT or NIV. However, in a subgroup  
6 3 analysis of critically ill patients, HFNC after extubation had a lower re-intubation rate  
7 4 compared to COT <sup>35</sup>. In a study that assessed overall ICU mortality and other hospital  
8 5 outcomes in patients who received HFNC therapy that failed, failure of HFNC  
9 6 resulted in delayed intubation and worse clinical outcomes. Early intubated patients  
10 7 had better overall ICU mortality, extubation success, ventilator weaning, and more  
11 8 ventilator-free days than late intubated patients <sup>15</sup>. Taken together, the findings from  
12 9 the present review and these previous studies suggest that larger, well designed RCTs  
13 10 are required to further investigate the safety and efficacy of HFNC in post-extubation  
14 11 adult surgical patients.

15 12 In the present review, there was 'medium' heterogeneity between studies  
16 13 included in the analyses investigating the rate of escalation of respiratory support.  
17 14 This is not surprising, given the differences in type of surgery, study design, target  
18 15 SPO<sub>2</sub>, therapeutic strategy, and risk of re-intubation between the studies included in  
19 16 the analysis of this outcome. Meta-regression identified type of surgery and the risk  
20 17 factors for re-intubation as the main sources of heterogeneity.

21 18 Our subgroup analyses showed no improvement in the re-intubation rate in  
22 19 patients who had undergone cardiac surgery and received HFNC compared to COT  
23 20 post-extubation. Cardiac patients are at high risk for PPCs, and thus many may not  
24 21 benefit from HFNC. The ARISCAT risk score, which predicts the risk of PPCs after  
25 22 surgery, suggests that patients undergoing cardiac surgery have a high risk for PPCs,  
26 23 likely due to the intrathoracic incision and longer duration of surgery, which may be  
27 24 extended by the need for extracorporeal circulation <sup>15</sup>.

28 25 The subgroup analysis stratified by risk for re-intubation showed HFNC was  
29 26 associated with a lower re-intubation rate and rate of escalation of respiratory support  
30 27 compared to COT in post-extubation patients with a high risk for re-intubation.  
31 28 Consistent with this finding, previous reports show HFNC reduced re-intubation rate  
32 29 compared to COT in critically ill patients with low risk of intubation<sup>10</sup>, and was not  
33  
34  
35  
36  
37  
38  
39  
40  
41  
42  
43  
44  
45  
46  
47  
48  
49  
50  
51  
52  
53  
54  
55  
56  
57  
58  
59  
60



1 inferior to NIV for preventing re-intubation and post-extubated respiratory failure in  
2 critically ill patients at high risk of intubation <sup>9</sup>.

3 The present study suggests that when SPO<sub>2</sub> is maintained above 90%-93%,  
4 HFNC may have benefit compared to COT in reducing the need to escalate  
5 respiratory support, but not for decreasing the re-intubation rate. Conversely, when  
6 SPO<sub>2</sub> was maintained above 95%, HFNC reduced the re-intubation rate but not the  
7 rate of escalation of respiratory support. The advantages of reducing the need to  
8 escalate respiratory support at the lower SPO<sub>2</sub> threshold vs. delaying the time to  
9 re-intubation at the higher SPO<sub>2</sub> threshold remain to be elucidated. Recent studies  
10 show that critically ill patients treated with conservative oxygen therapy (with a  
11 slightly lower SPO<sub>2</sub> target) vs. conventional therapy had a lower mechanical  
12 ventilation time and hospital or ICU mortality <sup>37,38</sup>.

13 In the overall or subgroup analyses in the present review, HFNC did not  
14 significantly reduce the incidence of PPCs or mortality compared to COT in  
15 post-extubation surgical patients. These data are in contrast to a previous report,  
16 which speculated that HFNC may affect the outcomes of postoperative patients by  
17 alleviating PPCs<sup>5</sup>

18 This systematic review and meta-analysis was associated with several limitations.  
19 First, not all included studies investigated re-intubation rates and respiratory support  
20 escalation as primary endpoints, and most of the included studies were single-center  
21 studies. Second, there were differences in the timing and duration of HFNC treatment  
22 and length of follow-up in the included studies. Third, the sample size was small; 3  
23 out of 10 studies were non-RCTs, including less than 50 patients each. These  
24 limitations represent potential sources of bias and heterogeneity.

## 25 **Conclusion**

26 Findings from this review suggest that HFNC is associated with a significantly lower  
27 re-intubation rate and rate of escalation of respiratory support compared to COT in  
28 post-extubation adult surgical patients, but there is no difference in the incidence of  
29 PPCs or mortality. More well-designed, large randomized controlled trials are needed  
30 to determine the patient population that is most likely to benefit from HFNC therapy.

1  
2  
3  
4 15 2 **Footnotes**

7 3 **Contributors:** ZL and FG had full access to all the data in the study and take  
8 4 responsibility for its integrity and the accuracy of the data analysis. ZL, SM, JX, HQ  
9 5 and FG performed the systematic review, study selection, and statistical analysis. WC,  
10 6 JX, YY, and XZ contributed to data extraction and the quality assessment. All authors  
11 7 participated in writing the article.

12 8 **Funding:** This study was supported by grants from the National Science and  
13 9 Technology Major Project (2017ZX10103004), Key Laboratory of Environmental  
14 10 Medicine Engineering of Ministry of Education, Southeast University; National  
15 11 Natural Science Foundation of China (Grant numbers: 81670074, 81471843,  
16 12 81871602) and the projects of Jiangsu province's medical key discipline  
17 13 (ZDXKA2016025). The funding sources had no role in the design and conduct of the  
18 14 study; collection, management, analysis, and interpretation of the data; or preparation,  
19 15 review, or approval of the article.

20 16 **Competing interests:** The authors do not have any potential conflicts of interest.

21 17 **Patient consent:** Not required.

22 18 **Provenance and peer review:** Not commissioned; externally peer reviewed.

23 19 **Data sharing statement:** Data are available from the corresponding author on  
24 20 reasonable request [fmguo2003@139.com](mailto:fmguo2003@139.com)

21

22

23

24

25

## References

1. Serpa Neto A, Hemmes SN, Barbas CS, et al. Incidence of mortality and morbidity related to postoperative lung injury in patients who have undergone abdominal or thoracic surgery: a systematic review and meta-analysis. *The Lancet Respiratory medicine* 2014;2(12):1007-15.
2. Melamed R, Boland LL, Normington JP, et al. Postoperative respiratory failure necessitating transfer to the intensive care unit in orthopedic surgery patients: risk factors, costs, and outcomes. *Perioperative medicine (London, England)* 2016;5:19.
3. Maggiore SM, Idone FA, Vaschetto R, et al. Nasal high-flow versus Venturi mask oxygen therapy after extubation. Effects on oxygenation, comfort, and clinical outcome. *American journal of respiratory and critical care medicine* 2014;190(3):282-8.
4. Ricard JD. High flow nasal oxygen in acute respiratory failure. *Minerva Anestesiol* 2012;78(7):836-41.
5. Ball L, Battaglini D, Pelosi P. Postoperative respiratory disorders. *Current opinion in critical care* 2016;22(4):379-85.
6. Stéphan F, Barrucand B, Petit P, et al. High-flow nasal oxygen vs noninvasive positive airway pressure in hypoxemic patients after cardiothoracic surgery: A randomized clinical trial. *JAMA - Journal of the American Medical Association* 2015;313(23):2331-39.
7. Ramirez A, Delord V, Khirani S, et al. Interfaces for long-term noninvasive positive pressure ventilation in children. *Intensive care medicine* 2012;38(4):655-62.
8. Zochios V, Collier T, Blandszun G, et al. The effect of high-flow nasal oxygen on hospital length of stay in cardiac surgical patients at high risk for respiratory complications: a randomised controlled trial. *Anaesthesia* 2018.
9. Hernandez G, Vaquero C, Colinas L, et al. Effect of Postextubation High-Flow Nasal Cannula vs Noninvasive Ventilation on Reintubation and Postextubation Respiratory Failure in High-Risk Patients: A Randomized Clinical Trial. *Jama* 2016;316(15):1565-74.
10. Hernandez G, Vaquero C, Gonzalez P, et al. Effect of Postextubation High-Flow Nasal Cannula vs Conventional Oxygen Therapy on Reintubation in Low-Risk Patients: A Randomized Clinical Trial. *Jama* 2016;315(13):1354-61.
11. Corley A, Caruana LR, Barnett AG, et al. Oxygen delivery through high-flow nasal cannulae increase end-expiratory lung volume and reduce respiratory rate in post-cardiac surgical patients. *British journal of anaesthesia* 2011;107(6):998-1004.
12. Parke RL, McGuinness SP. Pressures delivered by nasal high flow oxygen during all phases of the respiratory cycle. *Respiratory care* 2013;58(10):1621-4.
13. Stephan F, Barrucand B, Petit P, et al. High-Flow Nasal Oxygen vs Noninvasive Positive Airway Pressure in Hypoxemic Patients After Cardiothoracic Surgery: A Randomized Clinical Trial. *Jama* 2015;313(23):2331-9.
14. Song HZ, Gu JX, Xiu HQ, et al. The value of high-flow nasal cannula oxygen therapy after extubation in patients with acute respiratory failure. *Clinics (Sao Paulo, Brazil)* 2017;72(9):562-67.
15. Kang BJ, Koh Y, Lim CM, et al. Failure of high-flow nasal cannula therapy may delay intubation and increase mortality. *Intensive care medicine* 2015;41(4):623-32.
16. Dhillon NK, Smith EJT, Ko A, et al. Extubation to high-flow nasal cannula in critically ill surgical patients. *The Journal of surgical research* 2017;217:258-64.
17. Parke R, McGuinness S, Dixon R, Jull A: Open-label, phase II study of routine high-flow nasal oxygen therapy in cardiac surgical patients. In *British journal of anaesthesia* 2013;925-931.

- 1 18. Futier E, Paugam-Burtz C, Godet T, et al. Effect of early postextubation high-flow nasal cannula vs  
2 conventional oxygen therapy on hypoxaemia in patients after major abdominal surgery: a French  
3 multicentre randomised controlled trial (OPERA). *Intensive care medicine* 2016;42(12):1888-98.
- 4 19. Higgins JP, Altman DG, Gotzsche PC, et al. The Cochrane Collaboration's tool for assessing risk of  
5 bias in randomised trials. *Bmj* 2011;343:d5928.
- 6 20. Stang A. Critical evaluation of the Newcastle-Ottawa scale for the assessment of the quality of  
7 nonrandomized studies in meta-analyses. *European journal of epidemiology* 2010;25(9):603-5.
- 8 21. Higgins JP, Thompson SG, Deeks JJ, et al. Measuring inconsistency in meta-analyses. *Bmj*  
9 2003;327(7414):557-60.
- 10 22. Corley A, Bull T, Spooner AJ, et al. Direct extubation onto high-flow nasal cannulae post-cardiac  
11 surgery versus standard treatment in patients with a BMI  $\geq 30$ : a randomised controlled trial.  
12 *Intensive care medicine* 2015;41(5):887-94.
- 13 23. Xu XP, Gao YF, Zhang BB. Evaluation of the effects of precautionary high-flow oxygen therapy in  
14 patients undergoing tracheal intubation after stanford type A aortic dissection. *Chin J Nurs(China)*  
15 2018;53:568-72.
- 16 24. Yu Y, Qian X, Liu C, et al. Effect of High-Flow Nasal Cannula versus Conventional Oxygen  
17 Therapy for Patients with Thoracoscopic Lobectomy after Extubation. 2017;2017:7894631.
- 18 25. Brainard J, Scott BK, Sullivan BL, et al. Heated humidified high-flow nasal cannula oxygen after  
19 thoracic surgery - A randomized prospective clinical pilot trial. *Journal of critical care* 2017;40:225-28.
- 20 26. Chen Gj, Xu HY, Pang H. Application of humidified high flow nasal cannula in respiratory failure  
21 patients post esophagectomy for esophageal cancer. *ChIN J Crit Care(China)*;38:301-4.
- 22 27. Geng XH. Application of nasal high-flow humidification oxygen therapy system in patients with  
23 acute respiratory failure after cardiothoracic surgery. *Shandong Medical Journal (China)* 2016;56:94-6.
- 24 28. Sun T, Zhu HL. Clinical application of high-flow nasal cannula for the respiratory failure  
25 following radical resection of pulmonary carcinoma. *Chin J Prac Nurs(China)* 2017;33:2335-38.
- 26 29. Futier E, Paugam-Burtz C, Godet T, et al: Effect of early postextubation high-flow nasal cannula vs  
27 conventional oxygen therapy on hypoxaemia in patients after major abdominal surgery: a French  
28 multicentre randomised controlled trial (OPERA). In *Intensive care medicine* 2017;1888-1898.
- 29 30. Goligher EC, Slutsky AS. Not Just Oxygen? Mechanisms of Benefit from High-Flow Nasal  
30 Cannula in Hypoxemic. *Respiratory Failure*. 2017; 195:1128-3
- 31 31. Papazian L, Corley A, Hess D, et al. Use of high-flow nasal cannula oxygenation in ICU adults: a  
32 narrative review. *Intensive care medicine* 2016;42:1336-49.
- 33 32. Testa G, Iodice F, Ricci Z, et al. Comparative evaluation of high-flow nasal cannula and  
34 conventional oxygen therapy in paediatric cardiac surgical patients: a randomized controlled trial.  
35 *Interactive cardiovascular and thoracic surgery* 2014;19:456-61.
- 36 33. Spoletini G, Alotaibi M, Blasi F, et al. Heated Humidified High-Flow Nasal Oxygen in Adults:  
37 Mechanisms of Action and Clinical Implications. *Chest* 2015;148:253-61.
- 38 34. Goligher EC, Slutsky AS. Not Just Oxygen? Mechanisms of Benefit from High-Flow Nasal  
39 Cannula in Hypoxemic Respiratory Failure. 2017;195:1128-31.
- 40 35. Huang HW, Sun XM, Shi ZH, et al. Effect of High-Flow Nasal Cannula Oxygen Therapy Versus  
41 Conventional Oxygen Therapy and Noninvasive Ventilation on Reintubation Rate in Adult Patients  
42 After Extubation: A Systematic Review and Meta-Analysis of Randomized Controlled Trials. *Journal*  
43 *of intensive care medicine* 2017;885066617705118.

- 1  
2  
3  
4 1 36. Zhu Y, Yin H, Zhang R, et al. High-flow nasal cannula oxygen therapy vs conventional oxygen  
5 2 therapy in cardiac surgical patients: A meta-analysis. *Journal of critical care* 2017;38:123-28.  
6 3 37. Girardis M, Busani S, Damiani E, et al. Effect of Conservative vs Conventional Oxygen Therapy  
7 4 on Mortality Among Patients in an Intensive Care Unit: The Oxygen-ICU Randomized Clinical Trial.  
8 5 *Jama* 2016;316:1583-89.  
9  
10 6 38. Helmerhorst HJ, Schultz MJ, van der Voort PH, et al. Effectiveness and Clinical Outcomes of  
11 a Two-Step Implementation of Conservative Oxygenation Targets in Critically Ill Patients: A  
12 7  
13 8 Before and After Trial. *Critical care medicine* 2016;44:554-63.  
14  
15

## 9 **Table and Figure legends**

- 10 Figure 1 Flow diagram of study selection  
11  
12 Figure 2A Risk of bias summary for each included study. Red (-) indicates high risk of  
13 bias; yellow (?) indicates unclear risk; and green (+) indicates low risk of bias.  
14 Figure 2B, 2C Funnel plot for publication bias: B) Re-intubation rate; C) Rate of  
15 escalation of respiratory support  
16  
17 Figure 3 High-flow nasal cannula oxygen therapy (HFNC) versus conventional  
18 oxygen therapy (COT): Re-intubation rate  
19  
20 Figure 4 High-flow nasal cannula oxygen therapy (HFNC) versus conventional  
21 oxygen therapy (COT): Rate of escalation of respiratory support  
22  
23 Figure 5 High-flow nasal cannula oxygen therapy (HFNC) versus conventional  
24 oxygen therapy (COT): A) Postoperative pulmonary complications; B) Hospital  
25 mortality  
26  
27 Table 1 Characteristics of included studies  
28  
29 Table 2 Quality assessment: A) Cochrane collaboration methodology; B)  
30 Newcastle-Ottawa scale  
31  
32 Table 3 Subgroup analyses  
33  
34  
35  
36  
37  
38  
39  
40  
41  
42  
43  
44  
45  
46  
47  
48  
49  
50  
51  
52  
53  
54  
55  
56  
57  
58  
59  
60

1 Table 1: Characteristics of included studies

| Study                 | Study design       | Type of surgery               | Patient characteristics (HFNC/COT) |       |             | Target SPO2 (%) | Risk of re-intubation |
|-----------------------|--------------------|-------------------------------|------------------------------------|-------|-------------|-----------------|-----------------------|
|                       |                    |                               | Patient number                     | BMI   | Age (years) |                 |                       |
| <b>Chen, 2018</b>     | Case-control study | Thoracic                      | 44/45                              | NA    | 66/64       | 90              | High                  |
| <b>Xu, 2018</b>       | Cohort study       | Cardiovascular                | 45/45                              | 26/27 | 57/54       | 95              | High                  |
| <b>Brainard, 2017</b> | RCT                | Thoracic                      | 18/26                              | 26/25 | 57/59       | 95              | NA                    |
| <b>Dhillon, 2017</b>  | Case-control study | Mixed                         | 46/138                             | NA    | 63/58       | NA              | NA                    |
| <b>Geng, 2017</b>     | RCT                | Thoracic                      | 25/23                              | NA    | 63/63       | 90              | High                  |
| <b>Sun, 2017</b>      | RCT                | Thoracic                      | 24/24                              | NA    | 67/65       | 100             | High                  |
| <b>Yu, 2017</b>       | RCT                | Thoracic                      | 56/54                              | 26/25 | 56/56       | 95              | High                  |
| <b>Futier, 2016</b>   | RCT                | Abdominal or combine thoracic | 108/112                            | 25/25 | 62/661      | 95              | NA                    |
| <b>Corley, 2015</b>   | RCT                | Cardiovascular                | 81/74                              | 36/35 | 63/65       | 95              | High                  |
| <b>Parke, 2013</b>    | RCT                | Cardiovascular                | 169/171                            | 28/29 | 65/66       | 93              | High                  |

2 Data are expressed as median (interquartile range), or mean (standard deviation); NA, Not available or not reported

3

4

| Study                 | Characteristics of oxygen therapy (HFNC/COT) |                                                            | escalation of respiratory support# |                     | Strategy     | Study center  | Follow-up time: primary outcomes |
|-----------------------|----------------------------------------------|------------------------------------------------------------|------------------------------------|---------------------|--------------|---------------|----------------------------------|
|                       | HFNC Flow rate(L/min)                        | COT                                                        | HFNC                               | COT                 |              |               |                                  |
|                       |                                              |                                                            | NIV/Intubation                     | HFNC/NIV/Intubation |              |               |                                  |
| <b>Chen, 2018</b>     | 35-60                                        | Facemask                                                   | NA/7                               | NA/19               | Therapy      | Single center | 2 days                           |
| <b>Xu, 2018</b>       | 35-60                                        | 5-10L/min face mask                                        | 0/1                                | 0/0/7               | Prophylactic | Single center | 3 days                           |
| <b>Brainard, 2017</b> | 40                                           | Nasal cannula or face mask                                 | NA/1                               | NA/NA/2             | Prophylactic | Single center | 2 days                           |
| <b>Dhillon, 2017</b>  | NA                                           | Cool mist/nasal cannula (CM/NC)                            | NA/NA/3                            | NA/NA/19            | Prophylactic | Single center | NA                               |
| <b>Geng, 2017</b>     | 35-60                                        | Facemask                                                   | NA/NA/1                            | NA/NA/9             | Therapy      | Single center | NA                               |
| <b>Sun, 2017</b>      | 40-60                                        | 8-10L/min atomizing mask                                   | 1/3                                | 0/3/8               | Therapy      | Single center | 1 day                            |
| <b>Yu, 2017</b>       | 35-60                                        | Nasal prongs or facemask                                   | 2/0                                | 9/5/0               | Prophylactic | Multicenter   | 3                                |
| <b>Futier, 2016</b>   | 50-60                                        | Nasal prongs or facemask                                   | NA/NA(20)*                         | NA/NA/NA(14)*       | Prophylactic | Multicenter   | 7 days                           |
| <b>Corley, 2015</b>   | 35-50                                        | 2-4L/min via nasal cannulae or 6L/min via simple face mask | 3/0                                | 1/2/2               | Prophylactic | Single center | 1 day                            |
| <b>Parke, 2013</b>    | 45                                           | 2-4L/min via simple facemask or nasal prongs               | 9/2                                | 18/5/0              | Prophylactic | Single center | 2 days                           |

1 # only the final oxygen treatment was recorded; \* only get the total number; NA, Not available or not reported

1  
2  
3  
4  
5  
6  
7  
8  
9  
10  
11  
12  
13  
14  
15  
16  
17  
18  
19  
20  
21  
22  
23  
24  
25  
26  
27  
28  
29  
30  
31  
32  
33  
34  
35  
36  
37  
38  
39  
40  
41  
42  
43  
44  
45  
46

1

2 Table 2 Quality assessment: Newcastle-Ottawa scale

| Study         | Selection                                |                                     |                           |                                                                          | Comparability                                                   | Outcome               |                                                 |                                  | Overall stars |
|---------------|------------------------------------------|-------------------------------------|---------------------------|--------------------------------------------------------------------------|-----------------------------------------------------------------|-----------------------|-------------------------------------------------|----------------------------------|---------------|
|               | Representativeness of the exposed cohort | Selection of the non exposed cohort | Ascertainment of exposure | Demonstration that outcome of interest was not present at start of study | Comparability of cohorts on the basis of the design or analysis | Assessment of outcome | Was follow-up long enough for outcomes to occur | Adequacy of follow up of cohorts |               |
| Xu, 2018      | ★                                        | ★                                   | ★                         | ★                                                                        | ★                                                               | -                     | ★                                               | ★                                | 7             |
| Chen, 2018    | ★                                        | ★                                   | -                         | ★                                                                        | ★                                                               | ★                     | ★                                               | ★                                | 7             |
| Dhillon, 2017 | ★                                        | ★                                   | ★                         | ★                                                                        | ★                                                               | -                     | ★                                               | ★                                | 7             |

★ the quality met the criterion of this specific item; - Self-reported or unstated

3  
4  
5

For peer review only



1 Table 3 Subgroup analyses

| Outcome                    | No studies (No of patients) | Summary estimate (95% CI) | P value (summary estimate) | P value (heterogeneity) | I <sup>2</sup> (%) |
|----------------------------|-----------------------------|---------------------------|----------------------------|-------------------------|--------------------|
| <b>Re-intubation</b>       | 9 (1107)                    | 0.38* (0.23 to 0.61)      | 0.0001                     | 0.64                    | 0                  |
| Cardiac surgery            | 3 (585)                     | 0.43* (0.05 to 3.72)      | 0.44                       | 0.14                    | 49                 |
| Thoracic surgery           | 5 (338)                     | 0.36* (0.20 to 0.64)      | 0.0005                     | 0.73                    | 0                  |
| RCT                        | 6 (745)                     | 0.39* (0.17 to 0.87)      | 0.02                       | 0.41                    | 1                  |
| Non-RCT                    | 3 (362)                     | 0.37* (0.20 to 0.69)      | 0.002                      | 0.60                    | 0                  |
| Min target SPO2 (90%-93%)  | 3 (476)                     | 0.41* (0.09 to 1.92)      | 0.26                       | 0.11                    | 55                 |
| Min target SPO2 (95%)      | 4 (399)                     | 0.31* (0.09 to 1.01)      | 0.05                       | 0.72                    | 0                  |
| prophylactic               | 7 (1143)                    | 0.46* (0.21 to 1.03)      | 0.06                       | 0.53                    | 0                  |
| Therapy                    | 3 (184)                     | 0.34* (0.18 to 0.62)      | 0.0005                     | 0.45                    | 0                  |
| High risk of re-intubation | 7 (879)                     | 0.35* (0.20 to 0.60)      | 0.0002                     | 0.48                    | 0                  |
| <b>Escalation rate of</b>  | 10 (1327)                   | 0.43* (0.26 to 0.73)      | 0.002                      | 0.02                    | 54                 |

|                            |          |                       |         |      |    |  |
|----------------------------|----------|-----------------------|---------|------|----|--|
| <b>respiratory support</b> |          |                       |         |      |    |  |
| Cardiac surgery            | 3 (585)  | 0.45* (0.25 to 0.81)  | 0.008   | 0.51 | 0  |  |
| Thoracic surgery           | 5 (338)  | 0.31* (0.18 to 0.53)  | 0.0001  | 0.47 | 0  |  |
| RCT                        | 7 (965)  | 0.46* (0.22 to 0.93)  | 0.03    | 0.01 | 64 |  |
| Non-RCT                    | 3 (362)  | 0.37* (0.20 to 0.69)  | 0.002   | 0.60 | 0  |  |
| Min target SPO2 (90%-93%)  | 3 (476)  | 0.39* (0.23 to 0.67)  | 0.0005  | 0.34 | 8  |  |
| Min target SPO2 (95%)      | 5 (619)  | 0.46* (0.15 to 1.44)  | 0.18    | 0.01 | 70 |  |
| prophylactic               | 7 (1143) | 0.50* (0.25 to 1.00)  | 0.05    | 0.02 | 59 |  |
| Therapy                    | 3 (184)  | 0.34* (0.19 to 0.60)  | 0.0002  | 0.45 | 0  |  |
| High risk of re-intubation | 7 (879)  | 0.33* (0.22 to 0.49)  | 0.00001 | 0.5  | 0  |  |
| PPCs                       | 5 (606)  | 0.87* (0.70 to 1.08)  | 0.21    | 0.92 | 0  |  |
| RCT                        | 4 (422)  | 0.86* (0.69 to 1.086) | 0.20    | 0.83 | 0  |  |

|                            |         |                       |      |      |   |
|----------------------------|---------|-----------------------|------|------|---|
| prophylactic               | 4 (558) | 0.86* (0.68 to 1.08)  | 0.20 | 0.87 | 0 |
| <b>Mortality</b>           | 5 (942) | 0.45* (0.16 to 1.29)  | 0.14 | 0.79 | 0 |
| Cardiac surgery            | 1 (340) | 1.01* (0.06 to 16.05) | 0.99 | -    | - |
| Thoracic surgery           | 2 (198) | 0.26* (0.03 to 2.25)  | 0.22 | -    | - |
| RCT                        | 3 (670) | 0.77* (0.17 to 3.41)  | 0.73 | 0.82 | 0 |
| Non-RCT                    | 2 (272) | 0.27* (0.06 to 1.18)  | 0.08 | 0.98 | 0 |
| Min target SPO2 (90%-93%)  | 2 (428) | 0.41* (0.08 to 2.09)  | 0.29 | 0.45 | 0 |
| Min target SPO2 (95%)      | 2 (330) | 0.69* (0.12 to 4.06)  | 0.68 | -    | - |
| High risk of re-intubation | 3 (538) | 0.41* (0.08 to 2.09)  | 0.29 | 0.45 | 0 |

1 RCT, randomized controlled trial; PPCs, postoperative pulmonary complications \*Relative risk

2  
3  
4

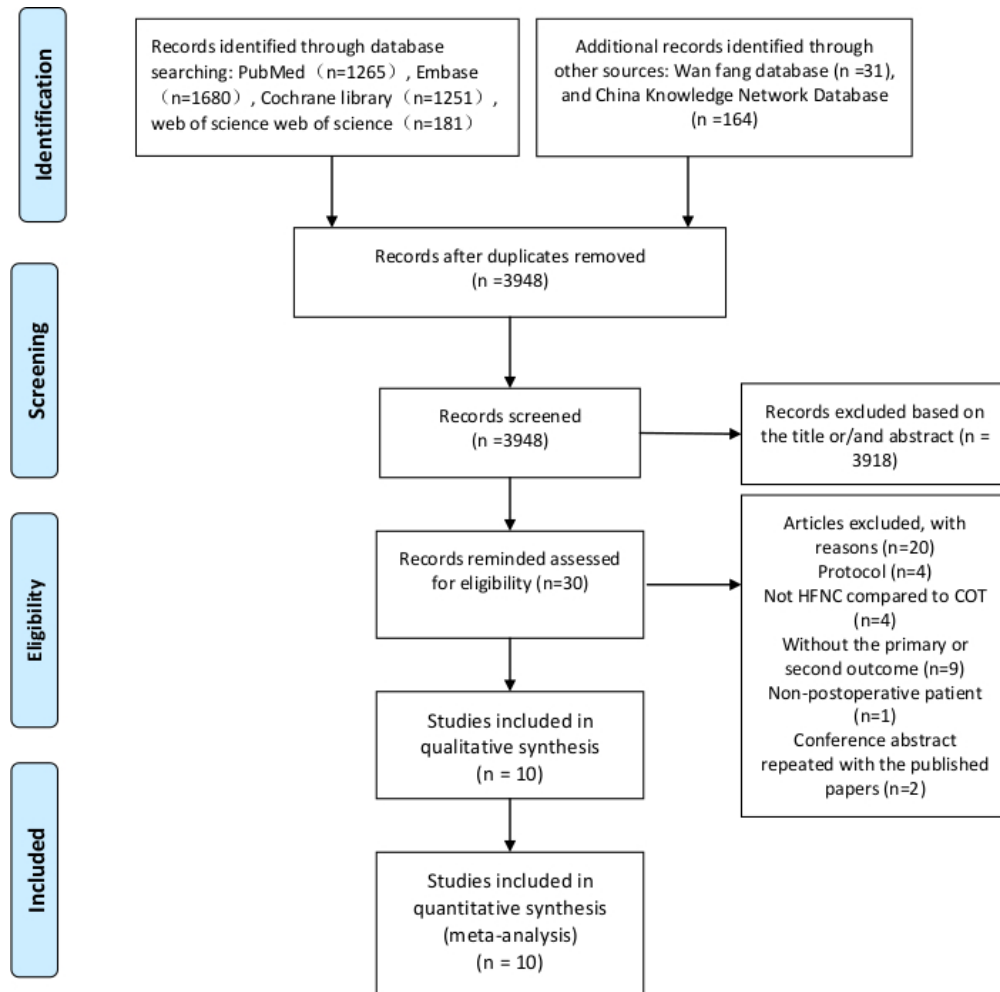

Flow diagram of study selection

59x58mm (300 x 300 DPI)

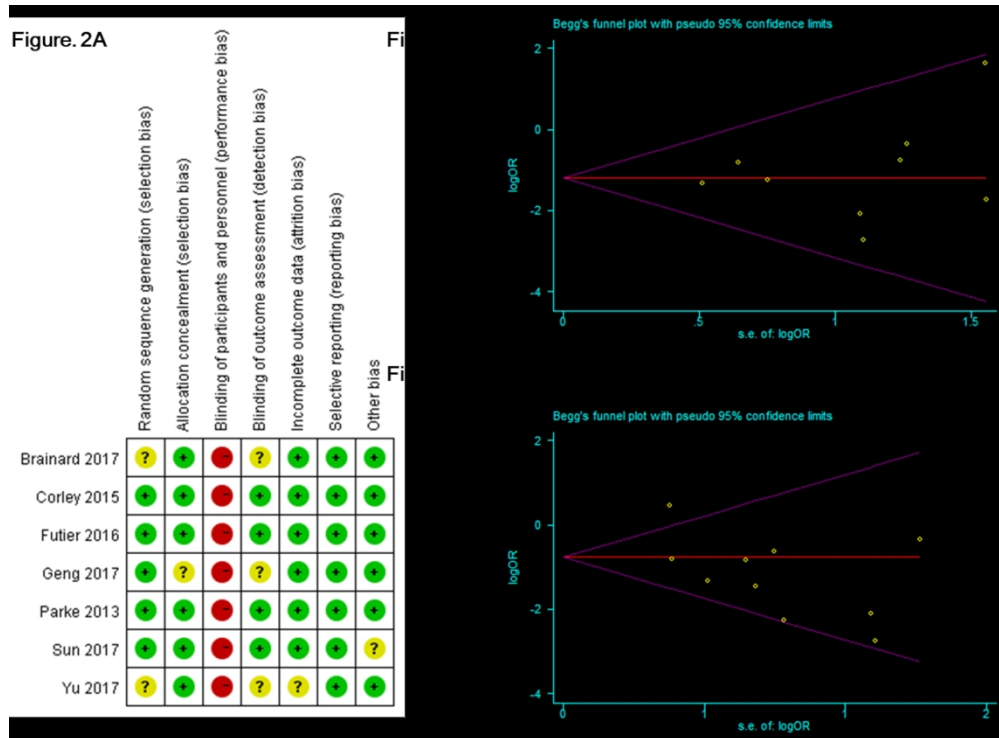

Figure 2A Risk of bias summary for each included study. Red (-) indicates high risk of bias; yellow (?) indicates unclear risk; and green (+) indicates low risk of bias.  
 Figure 2B, 2C Funnel plot for publication bias: B) Re-intubation rate; C) Rate of escalation of respiratory support

122x90mm (300 x 300 DPI)

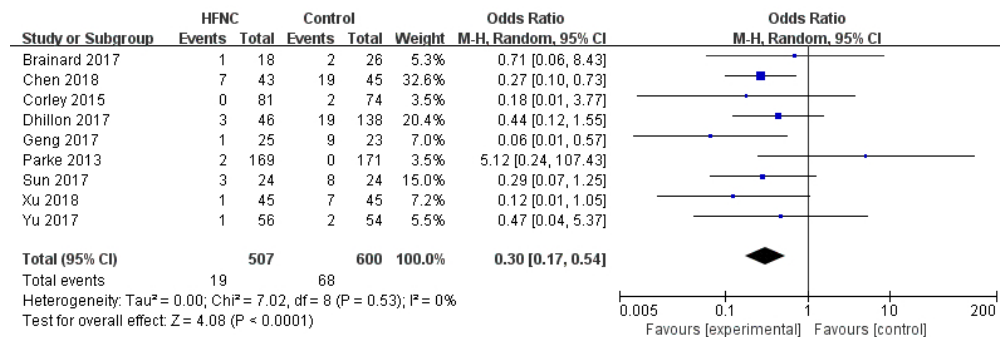

High-flow nasal cannula oxygen therapy (HFNC) versus conventional oxygen therapy (COT): Re-intubation rate

67x23mm (300 x 300 DPI)

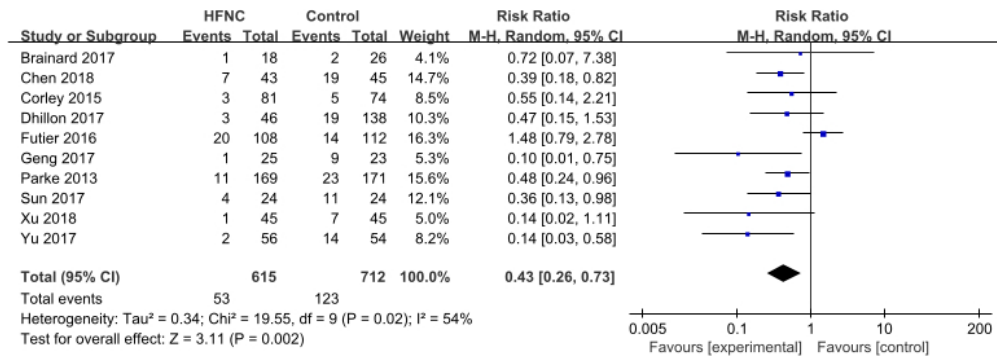

High-flow nasal cannula oxygen therapy (HFNC) versus conventional oxygen therapy (COT): Rate of escalation of respiratory support

65x22mm (300 x 300 DPI)

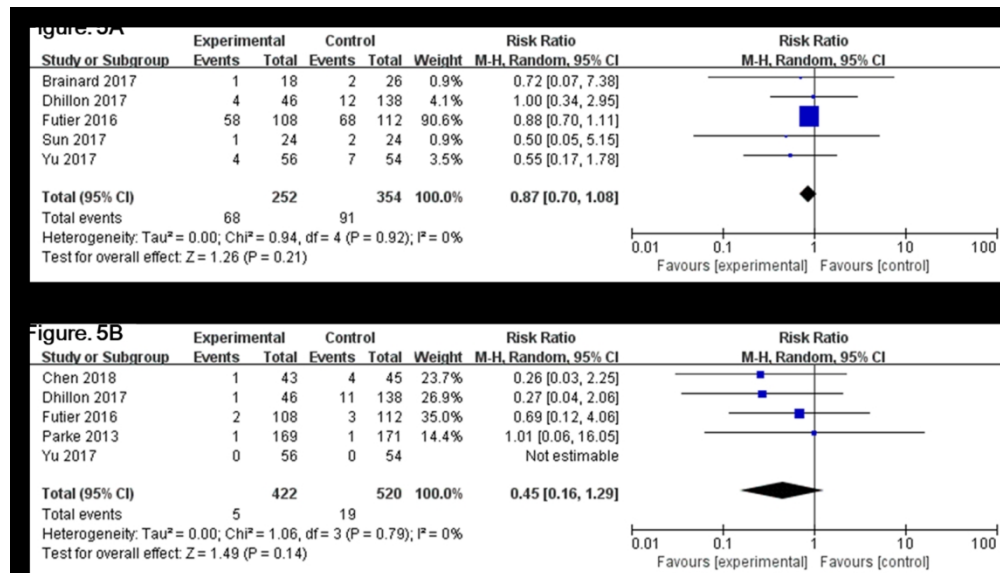

Figure 5 High-flow nasal cannula oxygen therapy (HFNC) versus conventional oxygen therapy (COT): A) Postoperative pulmonary complications; B) Hospital mortality

157x90mm (300 x 300 DPI)



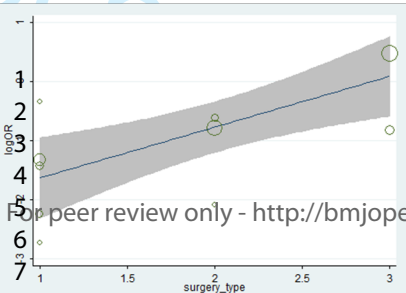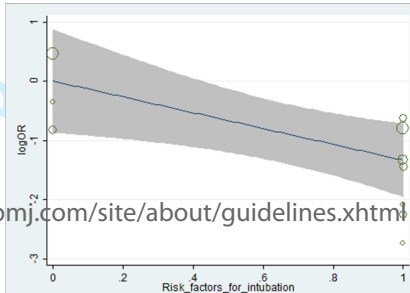

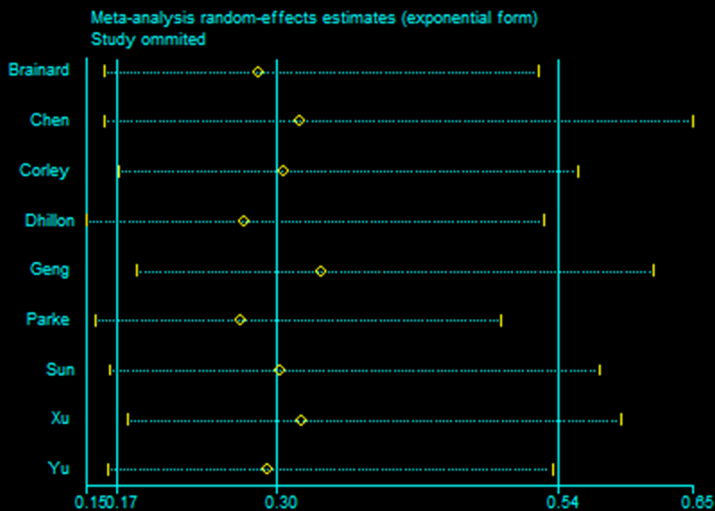17  
18  
19  
Supplementary figure. 2B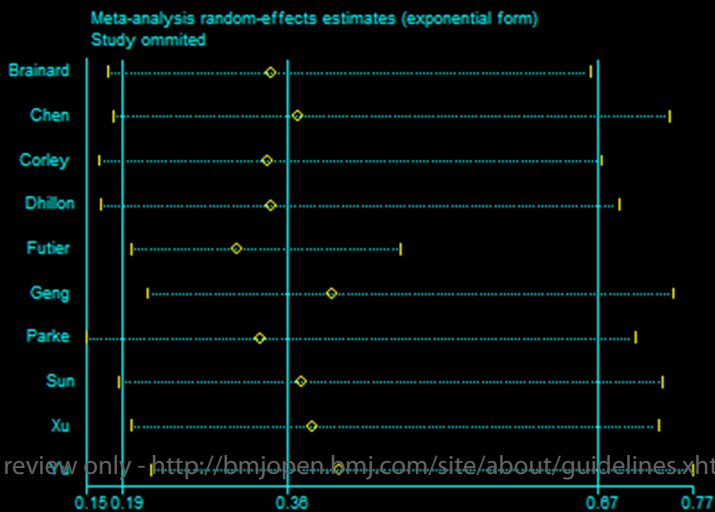

Supplementary Table 1 GRADE A) Re-intubation rate; B) Rate of escalation of respiratory support

A.

| Quality assessment                |                       |                         |                          |                         |                        |                      | No of patients |                | Effect                 |                                                 | Quality          | Importance |
|-----------------------------------|-----------------------|-------------------------|--------------------------|-------------------------|------------------------|----------------------|----------------|----------------|------------------------|-------------------------------------------------|------------------|------------|
| No of studies                     | Design                | Risk of bias            | Inconsistency            | Indirectness            | Imprecision            | Other considerations | Reinbutation   | Control        | Relative (95% CI)      | Absolute                                        |                  |            |
| <b>Reintubation-RCT</b>           |                       |                         |                          |                         |                        |                      |                |                |                        |                                                 |                  |            |
| 6                                 | randomised trials     | no serious risk of bias | no serious inconsistency | no serious indirectness | no serious imprecision | none                 | 8/373 (2.1%)   | 23/372 (6.2%)  | RR 0.39 (0.17 to 0.87) | 38 fewer per 1000 (from 8 fewer to 51 fewer)    | ⊕⊕⊕⊕<br>HIGH     | CRITICAL   |
|                                   |                       |                         |                          |                         |                        |                      |                | 5.7%           |                        | 35 fewer per 1000 (from 7 fewer to 47 fewer)    |                  |            |
| <b>Case control studies</b>       |                       |                         |                          |                         |                        |                      |                |                |                        |                                                 |                  |            |
| 2                                 | observational studies | serious <sup>1</sup>    | no serious inconsistency | no serious indirectness | no serious imprecision | none                 | 10/89 (11.2%)  | 38/183 (20.8%) | OR 0.32 (0.15 to 0.71) | 130 fewer per 1000 (from 51 fewer to 170 fewer) | ⊕○○○<br>VERY LOW | CRITICAL   |
|                                   |                       |                         |                          |                         |                        |                      |                | 28%            |                        | 169 fewer per 1000 (from 64 fewer to 225 fewer) |                  |            |
| <b>Reintubation- Cohort study</b> |                       |                         |                          |                         |                        |                      |                |                |                        |                                                 |                  |            |
| 1                                 | observational studies | no serious risk of bias | no serious inconsistency | no serious indirectness | no serious imprecision | none                 | 1/45 (2.2%)    | 7/45 (15.6%)   | OR 0.12 (0.01 to 1.05) | 134 fewer per 1000 (from 154 fewer to 7 more)   | ⊕⊕○○<br>LOW      | CRITICAL   |
|                                   |                       |                         |                          |                         |                        |                      |                | 15.6%          |                        | 134 fewer per 1000 (from 154 fewer to 7 more)   |                  |            |

1  
2  
3  
4  
5  
6  
7  
8  
9  
10  
11  
12  
13  
14  
15  
16  
17  
18  
19  
20  
21  
22  
23  
24  
25  
26  
27  
28  
29  
30  
31  
32  
33  
34  
35  
36  
37  
38  
39  
40  
41  
42  
43  
44  
45  
46

|  |  |  |  |  |  |  |  |  |  |       |  |  |
|--|--|--|--|--|--|--|--|--|--|-------|--|--|
|  |  |  |  |  |  |  |  |  |  | more) |  |  |
|--|--|--|--|--|--|--|--|--|--|-------|--|--|

<sup>1</sup> High flow nasal cannula oxygen therapy or conventional oxygen therapy based on the individual attending's discretion

For peer review only

B.

| Quality assessment                                            |                                    |                         |                          |                         |                        |                             | No of patients                    |                | Effect                 |                                                 | Quality       | Importance |
|---------------------------------------------------------------|------------------------------------|-------------------------|--------------------------|-------------------------|------------------------|-----------------------------|-----------------------------------|----------------|------------------------|-------------------------------------------------|---------------|------------|
| No of studies                                                 | Design                             | Risk of bias            | Inconsistency            | Indirectness            | Imprecision            | Other considerations        | Escalation of respiratory support | Control        | Relative (95% CI)      | Absolute                                        |               |            |
| <b>Escalation of respiratory support-RCT</b>                  |                                    |                         |                          |                         |                        |                             |                                   |                |                        |                                                 |               |            |
| 7                                                             | randomised trials                  | no serious risk of bias | serious <sup>1</sup>     | no serious indirectness | no serious imprecision | reporting bias <sup>2</sup> | 42/481 (8.7%)                     | 78/484 (16.1%) | RR 0.54 (0.38 to 0.77) | 74 fewer per 1000 (from 37 fewer to 100 fewer)  | ⊕⊕○○ LOW      | CRITICAL   |
|                                                               |                                    |                         |                          |                         |                        |                             |                                   | 13.5%          |                        | 62 fewer per 1000 (from 31 fewer to 84 fewer)   |               |            |
| <b>Escalation of respiratory support-case control studies</b> |                                    |                         |                          |                         |                        |                             |                                   |                |                        |                                                 |               |            |
| 2                                                             | observational studies <sup>3</sup> | serious <sup>4</sup>    | no serious inconsistency | no serious indirectness | no serious imprecision | none                        | 10 cases 38 controls              |                | OR 0.32 (0.15 to 0.71) | -                                               | ⊕○○○ VERY LOW | CRITICAL   |
|                                                               |                                    |                         |                          |                         |                        |                             |                                   | 38/183 (20.8%) |                        | 130 fewer per 1000 (from 51 fewer to 170 fewer) |               |            |
|                                                               |                                    |                         |                          |                         |                        |                             |                                   | 28%            |                        | 169 fewer per 1000 (from 64 fewer to 225 fewer) |               |            |
| <b>Escalation of respiratory support- Cohort studies</b>      |                                    |                         |                          |                         |                        |                             |                                   |                |                        |                                                 |               |            |
| 1                                                             | observational studies              | no serious risk of bias | no serious inconsistency | no serious indirectness | no serious imprecision | none                        | 1/45 (2.2%)                       | 7/45 (15.6%)   | OR 0.12 (0.01 to       | 134 fewer per 1000 (from 154 fewer to 7         | ⊕⊕○○ LOW      | CRITICAL   |

1  
2  
3  
4  
5  
6  
7  
8  
9  
10  
11  
12  
13  
14  
15  
16  
17  
18  
19  
20  
21  
22  
23  
24  
25  
26  
27  
28  
29  
30  
31  
32  
33  
34  
35  
36  
37  
38  
39  
40  
41  
42  
43  
44  
45  
46

|  |  |  |  |  |  |  |  |       |       |                                                     |  |  |
|--|--|--|--|--|--|--|--|-------|-------|-----------------------------------------------------|--|--|
|  |  |  |  |  |  |  |  |       | 1.05) | more)                                               |  |  |
|  |  |  |  |  |  |  |  | 15.6% |       | 134 fewer per 1000<br>(from 154 fewer to 7<br>more) |  |  |

<sup>1</sup> I<sup>2</sup>=64%, the heterogeneity was high

<sup>2</sup> Funnel plots suggest that there may be publication bias in Futier's research

<sup>3</sup> case-control

<sup>4</sup> High flow nasal cannula oxygen therapy or conventional oxygen therapy based on the individual attending's discretion

For peer review only

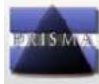

# PRISMA 2009 Checklist

1  
2  
3  
4  
5  
6  
7  
8  
9  
10  
11  
12  
13  
14  
15  
16  
17  
18  
19  
20  
21  
22  
23  
24  
25  
26  
27  
28  
29  
30  
31  
32  
33  
34  
35  
36  
37  
38  
39  
40  
41  
42  
43  
44  
45  
46  
47

| Section/topic                      | #  | Checklist item                                                                                                                                                                                                                                                                                              | Reported on page #               |
|------------------------------------|----|-------------------------------------------------------------------------------------------------------------------------------------------------------------------------------------------------------------------------------------------------------------------------------------------------------------|----------------------------------|
| <b>TITLE</b>                       |    |                                                                                                                                                                                                                                                                                                             |                                  |
| Title                              | 1  | Identify the report as a systematic review, meta-analysis, or both.                                                                                                                                                                                                                                         | Page1,line1-3                    |
| <b>ABSTRACT</b>                    |    |                                                                                                                                                                                                                                                                                                             |                                  |
| Structured summary                 | 2  | Provide a structured summary including, as applicable: background; objectives; data sources; study eligibility criteria, participants, and interventions; study appraisal and synthesis methods; results; limitations; conclusions and implications of key findings; systematic review registration number. | Page2,line1-27                   |
| <b>INTRODUCTION</b>                |    |                                                                                                                                                                                                                                                                                                             |                                  |
| Rationale                          | 3  | Describe the rationale for the review in the context of what is already known.                                                                                                                                                                                                                              | Page4,line2-21                   |
| Objectives                         | 4  | Provide an explicit statement of questions being addressed with reference to participants, interventions, comparisons, outcomes, and study design (PICOS).                                                                                                                                                  | Page4,line22-24;                 |
| <b>METHODS</b>                     |    |                                                                                                                                                                                                                                                                                                             |                                  |
| Protocol and registration          | 5  | Indicate if a review protocol exists, if and where it can be accessed (e.g., Web address), and, if available, provide registration information including registration number.                                                                                                                               | No                               |
| Eligibility criteria               | 6  | Specify study characteristics (e.g., PICOS, length of follow-up) and report characteristics (e.g., years considered, language, publication status) used as criteria for eligibility, giving rationale.                                                                                                      | Page5,line4-9                    |
| Information sources                | 7  | Describe all information sources (e.g., databases with dates of coverage, contact with study authors to identify additional studies) in the search and date last searched.                                                                                                                                  | Page4,line27-30<br>Page5,line1-3 |
| Search                             | 8  | Present full electronic search strategy for at least one database, including any limits used, such that it could be repeated.                                                                                                                                                                               | Appendix<br>Search strategy      |
| Study selection                    | 9  | State the process for selecting studies (i.e., screening, eligibility, included in systematic review, and, if applicable, included in the meta-analysis).                                                                                                                                                   | Page5,line13-18                  |
| Data collection process            | 10 | Describe method of data extraction from reports (e.g., piloted forms, independently, in duplicate) and any processes for obtaining and confirming data from investigators.                                                                                                                                  | Page5,line19-23<br>Page6,line1-6 |
| Data items                         | 11 | List and define all variables for which data were sought (e.g., PICOS, funding sources) and any assumptions and simplifications made.                                                                                                                                                                       | Page5,line24-30<br>Page6,line1-6 |
| Risk of bias in individual studies | 12 | Describe methods used for assessing risk of bias of individual studies (including specification of whether this was done at the study or outcome level), and how this information is to be used in any data synthesis.                                                                                      | Page6,line7-16                   |

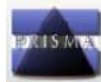

# PRISMA 2009 Checklist

|   |                      |    |                                                                                                                                                                    |                 |
|---|----------------------|----|--------------------------------------------------------------------------------------------------------------------------------------------------------------------|-----------------|
| 4 | Summary measures     | 13 | State the principal summary measures (e.g., risk ratio, difference in means).                                                                                      | Page6,line17-25 |
| 5 | Synthesis of results | 14 | Describe the methods of handling data and combining results of studies, if done, including measures of consistency (e.g., I <sup>2</sup> ) for each meta-analysis. | Page6,line26-29 |

Page 1 of 2

| Section/topic                 | #  | Checklist item                                                                                                                                                                                           | Reported on page #                                     |
|-------------------------------|----|----------------------------------------------------------------------------------------------------------------------------------------------------------------------------------------------------------|--------------------------------------------------------|
| Risk of bias across studies   | 15 | Specify any assessment of risk of bias that may affect the cumulative evidence (e.g., publication bias, selective reporting within studies).                                                             | Page7,line9-10                                         |
| Additional analyses           | 16 | Describe methods of additional analyses (e.g., sensitivity or subgroup analyses, meta-regression), if done, indicating which were pre-specified.                                                         | Page6,line28-29;<br>Page7,line1-8;                     |
| <b>RESULTS</b>                |    |                                                                                                                                                                                                          |                                                        |
| Study selection               | 17 | Give numbers of studies screened, assessed for eligibility, and included in the review, with reasons for exclusions at each stage, ideally with a flow diagram.                                          | Figure1                                                |
| Study characteristics         | 18 | For each study, present characteristics for which data were extracted (e.g., study size, PICOS, follow-up period) and provide the citations.                                                             | Table 1                                                |
| Risk of bias within studies   | 19 | Present data on risk of bias of each study and, if available, any outcome level assessment (see item 12).                                                                                                | Page8,line16-26                                        |
| Results of individual studies | 20 | For all outcomes considered (benefits or harms), present, for each study: (a) simple summary data for each intervention group (b) effect estimates and confidence intervals, ideally with a forest plot. | Page8,line16-26                                        |
| Synthesis of results          | 21 | Present results of each meta-analysis done, including confidence intervals and measures of consistency.                                                                                                  | Table 3                                                |
| Risk of bias across studies   | 22 | Present results of any assessment of risk of bias across studies (see Item 15).                                                                                                                          | Table 2 and Fig2A                                      |
| Additional analysis           | 23 | Give results of additional analyses, if done (e.g., sensitivity or subgroup analyses, meta-regression [see Item 16]).                                                                                    | Supplementary Figure 1, supplementary Figure 2         |
| <b>DISCUSSION</b>             |    |                                                                                                                                                                                                          |                                                        |
| Summary of evidence           | 24 | Summarize the main findings including the strength of evidence for each main outcome; consider their relevance to key groups (e.g., healthcare providers, users, and policy makers).                     | Page10,line12-30<br>Page11,line1-30<br>Page12,line1-17 |
| Limitations                   | 25 | Discuss limitations at study and outcome level (e.g., risk of bias), and at review-level (e.g., incomplete retrieval of identified research, reporting bias).                                            | Page12,line18-24                                       |



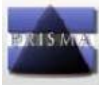

# PRISMA 2009 Checklist

1  
2  
3  
4  
5  
6  
7  
8  
9  
10  
11  
12  
13  
14  
15  
16  
17  
18  
19  
20  
21  
22  
23  
24  
25  
26  
27  
28  
29  
30  
31  
32  
33  
34  
35  
36  
37  
38  
39  
40  
41  
42  
43  
44  
45  
46  
47

|                |    |                                                                                                                                            |                  |
|----------------|----|--------------------------------------------------------------------------------------------------------------------------------------------|------------------|
| Conclusions    | 26 | Provide a general interpretation of the results in the context of other evidence, and implications for future research.                    | Page12,line25-30 |
| <b>FUNDING</b> |    |                                                                                                                                            |                  |
| Funding        | 27 | Describe sources of funding for the systematic review and other support (e.g., supply of data); role of funders for the systematic review. | Page13,line8-15  |

From: Moher D, Liberati A, Tetzlaff J, Altman DG, The PRISMA Group (2009). Preferred Reporting Items for Systematic Reviews and Meta-Analyses: The PRISMA Statement. PLoS Med 6(7): e1000097. doi:10.1371/journal.pmed1000097

For more information, visit: [www.prisma-statement.org](http://www.prisma-statement.org).

Page 2 of 2

# BMJ Open

## The effect of high-flow nasal cannula oxygen therapy compared with conventional oxygen therapy in postoperative patients: a systematic review and meta-analysis

|                                 |                                                                                                                                                                                                                                                                                                                                                                                                                                                                                                                                                                                                                                                                                                                                                                                                                                                                                                                                                                                          |
|---------------------------------|------------------------------------------------------------------------------------------------------------------------------------------------------------------------------------------------------------------------------------------------------------------------------------------------------------------------------------------------------------------------------------------------------------------------------------------------------------------------------------------------------------------------------------------------------------------------------------------------------------------------------------------------------------------------------------------------------------------------------------------------------------------------------------------------------------------------------------------------------------------------------------------------------------------------------------------------------------------------------------------|
| Journal:                        | <i>BMJ Open</i>                                                                                                                                                                                                                                                                                                                                                                                                                                                                                                                                                                                                                                                                                                                                                                                                                                                                                                                                                                          |
| Manuscript ID                   | bmjopen-2018-027523.R2                                                                                                                                                                                                                                                                                                                                                                                                                                                                                                                                                                                                                                                                                                                                                                                                                                                                                                                                                                   |
| Article Type:                   | Research                                                                                                                                                                                                                                                                                                                                                                                                                                                                                                                                                                                                                                                                                                                                                                                                                                                                                                                                                                                 |
| Date Submitted by the Author:   | 10-Jun-2019                                                                                                                                                                                                                                                                                                                                                                                                                                                                                                                                                                                                                                                                                                                                                                                                                                                                                                                                                                              |
| Complete List of Authors:       | Lu, Zhonghua; Department of Critical Care Medicine, Zhongda Hospital, School of Medicine, Southeast University<br>Chang, Wei; Zhongda Hospital, School of Medicine, Southeast University, Department of Critical Care Medicine<br>Meng, Shan-Shan; Zhongda Hospital, School of Medicine, Southeast University, Department of Critical Care Medicine<br>Zhang, Xiwen; Zhongda Hospital, School of Medicine, Southeast University<br>Xie, Jianfeng; School of Medicine, Southeast University, Critical Care Medicine;<br>Xu, Jing-Yuan; Zhongda Hospital, School of Medicine, Southeast University, Department of Critical Care Medicine<br>Qiu, Haibo; Zhongda Hospital, School of Medicine, Southeast University<br>Yang, Yi; Zhongda Hospital, School of Medicine, Southeast University, Department of Critical Care Medicine<br>Guo, Fengmei; Department of Critical Care Medicine, Zhongda Hospital, School of Medicine, Southeast University, Zhongda Hospital, Southeast University |
| <b>Primary Subject Heading</b>: | Intensive care                                                                                                                                                                                                                                                                                                                                                                                                                                                                                                                                                                                                                                                                                                                                                                                                                                                                                                                                                                           |
| Secondary Subject Heading:      | Respiratory medicine, Surgery, Intensive care, Anaesthesia                                                                                                                                                                                                                                                                                                                                                                                                                                                                                                                                                                                                                                                                                                                                                                                                                                                                                                                               |
| Keywords:                       | high flow nasal cannula, surgical patients, reintubation, escalation of respiratory support, pulmonary complications                                                                                                                                                                                                                                                                                                                                                                                                                                                                                                                                                                                                                                                                                                                                                                                                                                                                     |
|                                 |                                                                                                                                                                                                                                                                                                                                                                                                                                                                                                                                                                                                                                                                                                                                                                                                                                                                                                                                                                                          |

SCHOLARONE™  
Manuscripts

1  
2  
3  
4 1 **The effect of high-flow nasal cannula oxygen therapy compared with**  
5 2 **conventional oxygen therapy in postoperative patients: a systematic review and**  
6 3  
7 4  
8 5  
9 6  
10 7  
11 8  
12 9  
13 10  
14 11  
15 12  
16 13  
17 14  
18 15  
19 16  
20 17  
21 18  
22 19  
23 20  
24 21  
25 22  
26 23  
27 24  
28 25  
29 26  
30 27  
31 28  
32 29  
33 30  
34 31  
35 32  
36 33  
37 34  
38 35  
39 36  
40 37  
41 38  
42 39  
43 40  
44 41  
45 42  
46 43  
47 44  
48 45  
49 46  
50 47  
51 48  
52 49  
53 50  
54 51  
55 52  
56 53  
57 54  
58 55  
59 56  
60 57

**meta-analysis**

5 Zhonghua Lu, MD<sup>1</sup>; Wei Chang; MD<sup>1</sup>, Shanshan Meng, MD<sup>1</sup>; Xiwen Zhang, MD<sup>1</sup>;  
6 Jianfeng Xie, MD<sup>1</sup>; Jingyuan Xu, MD<sup>1</sup>; Haibo Qiu, MD, PHD <sup>1</sup>; Yi Yang, MD, PHD  
7 <sup>1</sup>; Fengmei Guo, MD, PHD<sup>1</sup>

9 Corresponding author:

10 Fengmei Guo

11 Tel: +86-25-83272200;

12 Fax: +86-25-83272011;

13 Zhongda Hospital, Southeast University, 87 Dingjia Bridge, Hunan Road, Gu Lou

14 District, 210009, Nanjing, China

15 Email: fmguo2003@139.com

17 The authors' affiliations are as follows:

18 <sup>1</sup>Department of Critical Care Medicine, Zhongda Hospital, School of Medicine,  
19 Southeast University, Nanjing, China

21 Email addresses of the authors:

22 Zhonghua Lu: luzhonghua077@126.com

23 Wei Chang: ewei\_0181@126.com

24 Shanshan Meng: mengshanshan0101@163.com

25 Xiwen Zhang: xiwen\_zhang@126.com

26 Jianfeng Xie: xie820405@126.com

27 Jingyuan Xu: xujingyuanmail@163.com

28 Haibo Qiu: haiboq2000@163.com

29 Yi Yang: yiyiyang2004@163.com

30 Fengmei Guo: fmguo2003@139.com

1 **Objective:** To evaluate the effect of high flow nasal cannula oxygen therapy (HFNC)  
2 vs. conventional oxygen therapy (COT) on the re-intubation rate, rate of escalation of  
3 respiratory support and clinical outcomes in post-extubation adult surgical patients.

4 **Design:** Systematic review and meta-analysis of published literature.

5 **Data sources:** PubMed, Embase, the Cochrane Library, Web of Science, China  
6 National Knowledge Index (CNKI) and Wan fang databases were searched up to  
7 August 2018.

8 **Eligibility criteria:** Studies in postoperative adult surgical patients ( $\geq 18$  years);  
9 Receiving HFNC or COT applied immediately after extubation that reported  
10 re-intubation, escalation of respiratory support, postoperative pulmonary  
11 complications (PPCs), and mortality were eligible for inclusion.

12 **Data extraction and synthesis:** The following data was extracted from the included  
13 studies: first author's name, year of publication, study population, country of origin,  
14 study design, number of patients, patients' baseline characteristics, and outcomes.  
15 Associations were evaluated using relative risks (RRs) and 95% confidence intervals  
16 (CIs).

17 **Results:** This meta-analysis included 10 studies (1327 patients). HFNC significantly  
18 reduced the re-intubation rate (risk ratio (RR) 0.38, 95% CI 0.23-0.61,  $P < 0.0001$ ) and  
19 rate of escalation of respiratory support (RR 0.43, 95% CI 0.26-0.73,  $P = 0.002$ ) in  
20 post-extubation surgical patients compared to COT. There were no differences in the  
21 incidence of PPCs (RR 0.87, 95% CI 0.70-1.08,  $P = 0.21$ ) or mortality (RR 0.45, 95%  
22 CI 0.16-1.29,  $P = 0.14$ ).

23 **Conclusions:** HFNC is associated with a significantly lower re-intubation rate and  
24 rate of escalation of respiratory support compared to COT in post-extubation adult  
25 surgical patients, but there is no difference in the incidence of PPCs or mortality.  
26 More well-designed, large randomized controlled trials are needed to determine the  
27 subpopulation of patients who are most likely to benefit from HFNC therapy.

28

1  
2  
3  
4 1 **Key Words:** high flow nasal cannula; surgical patients; re-intubation; escalation of  
5  
6 2 respiratory support; mortality  
7  
8 3  
9 4

10 4  
11 5 **Strengths and limitations of this study**

12  
13 6 ➤ This meta-analysis synthesized data from randomized trials and observational  
14  
15 7 studies to analyze the effect of high flow nasal cannula oxygen therapy (HFNC)  
16  
17 8 versus conventional oxygen therapy (COT) on re-intubation rate, rate of  
18  
19 9 escalation of respiratory support and incidence of PPCs and mortality in  
20  
21 10 post-extubation surgical patients.

22  
23 11 ➤ The possible risk of bias for RCTs and case-control and cohort studies were  
24  
25 12 assessed using Cochrane Collaboration methodology or the Newcastle-Ottawa  
26  
27 13 scale.

28  
29 14 ➤ Sources of heterogeneity between studies were investigated using random-effects  
30  
31 15 meta-regression. Subgroup analyses were conducted to investigate the  
32  
33 16 subpopulation of patients who were most likely to benefit from HFNC therapy.

34  
35 17 ➤ However, the clinical heterogeneity between trials included was relatively high  
36  
37 18 and a patient level meta-analysis might still be needed.  
38  
39 19  
40  
41 20  
42  
43  
44  
45  
46  
47  
48  
49  
50  
51  
52  
53  
54  
55  
56  
57  
58  
59  
60

## 1 INTRODUCTION

2 Postoperative respiratory failure is associated with perioperative morbidity and  
3 mortality in surgical patients, and high costs of healthcare <sup>1 2</sup>. Causes of early  
4 postoperative respiratory failure include hypoxemia, diaphragmatic dysfunction,  
5 atelectasis due to postoperative alveolar collapse, or fluid accumulation<sup>3–4</sup>.  
6 Prophylactic strategies such as protective intraoperative mechanical ventilation,  
7 postoperative physiotherapy, and noninvasive mechanical ventilation (NIV) may  
8 reduce the incidence of postoperative pulmonary complications (PPCs) and improve  
9 the prognosis of surgical patients<sup>5</sup>. In particular, some evidence supports the use of  
10 NIV for postoperative respiratory failure <sup>6</sup>; however, this technique requires  
11 substantial resources and technical expertise, and may cause discomfort to patients <sup>7</sup>.

12 High flow nasal cannula oxygen therapy (HFNC) is increasingly used in the  
13 prevention and treatment of respiratory failure in post-extubation non-surgical and  
14 surgical patients<sup>6–8–9</sup>. The advantages of HFNC compared to conventional oxygen  
15 therapy (COT) include improved comfort, delivery of a predictable sustained partial  
16 pressure of oxygen due to a reduction of room air entrainment, good humidification,  
17 decreased anatomical dead space, and positive end expiratory pressure (PEEP)<sup>3–4–10–14</sup>.  
18 However, failure of HFNC in patients with pulmonary complications can lead to  
19 delayed intubation causing morbidity and mortality<sup>15</sup>. Therefore, the safety and  
20 efficacy of HFNC is being increasingly investigated in the literature, but findings are  
21 inconsistent <sup>16–18</sup>. In an attempt to provide some clarity, the present systematic review  
22 and meta-analysis evaluated the effect of HFNC vs. COT on the re-intubation rate,  
23 rate of escalation of respiratory support, and clinical outcomes in post-extubation  
24 adult surgical patients.

## 26 METHODS

### 27 Data Sources and Searches

28 The PubMed, Embase, Cochrane Library, Web of Science, China National  
29 Knowledge Index (CNKI) and Wan fang databases were searched from inception to  
30 August 31, 2018 using the following keywords: (“high flow” or “high-flow”) and

1 (“operation” or “operative” or “surgery” or “Surgical”) (**Supplementary Figure 1**).  
2 Additional studies were identified by manually searching the reference lists from  
3 relevant articles and reviews. No restrictions on language or study design were  
4 applied.

### 5 **Inclusion and Exclusion Criteria**

6 Inclusion criteria were: 1) study population: postoperative adult surgical patients ( $\geq$   
7 18 years); 2) interventions: HFNC vs. COT; HFNC or COT were applied immediately  
8 after extubation; COT was administered via a cool mist/nasal cannula (CM/NC) or  
9 face mask; and 3) outcomes: re-intubation, escalation of respiratory support, PPCs and  
10 mortality.

11 Exclusion criteria were: 1) Studies in postoperative surgical patients who did not  
12 receive HFNC after extubation; 2) use of a control other than COT; 3) reviews, letters,  
13 case reports; or 4) in vitro studies or animal experiments.

### 14 **Study selection**

15 Two review authors (Z-H.L., S-S.M.) independently assessed titles and abstracts to  
16 determine if a study met the inclusion criteria. The full text of potentially relevant  
17 studies was retrieved and reviewed. Disagreements about study selection were  
18 resolved thorough discussion with a third reviewer (W.C.) until consensus was  
19 reached.

### 20 **Data extraction**

21 Two review authors (Z-H.L., S-S.M.) independently extracted data from the included  
22 studies, including first author’s name, year of publication, study population, country  
23 of origin, study design, number of patients, patients’ baseline characteristics, and  
24 outcomes.

25 Primary outcomes were re-intubation rate and rate of escalation of respiratory  
26 support. In post-extubation adult surgical patients receiving COT, respiratory support  
27 was escalated to HFNC, NIV or invasive mechanical ventilation (IMV) according to  
28 the following algorithms: COT→HFNC, COT→NIV, COT→HFNC→IMV, COT→  
29 NIV→IMV. In post-extubation adult surgical patients receiving HFNC, respiratory  
30 support was escalated to NIV or IMV according to the following algorithms: HFNC

1 →NIV, HFNC→IMV, HFNC→NIV→IMV. Respiratory therapy was escalated when  
2 the patient progressed to acute respiratory failure or due to other causes.

3 Secondary outcomes were the incidence of PPCs, defined as PPCs identified in  
4 the original article, new postoperative pneumonia and atelectasis, and in hospital or  
5 28-day mortality. Disagreements about data extraction were resolved through  
6 discussion with a third reviewer (W.C.) until consensus was reached.

### 7 **Assessment of Risk of Bias**

8 Risk of bias in included RCTs was assessed using Cochrane Collaboration  
9 methodology<sup>19</sup>, which evaluates the following domains: adequacy of sequence  
10 generation; allocation sequence concealment; blinding of participants and caregivers;  
11 blinding for outcome assessment; incomplete outcome data; selective outcome  
12 reporting; and the other sources of bias. Risk of bias was evaluated as 'low risk', 'high  
13 risk, or 'unclear risk', Risk of bias in included case-control or cohort studies was  
14 assessed using a modified Newcastle-Ottawa scale, which includes three categories:  
15 selection, comparability, and exposure or outcome, with each study awarded a  
16 maximum of nine stars<sup>20</sup>.

### 17 **Statistical Analysis**

18 Statistical analysis was performed with Review Manager Software 5.3 (The Nordic  
19 Cochrane Center, The Cochrane Collaboration, Copenhagen Denmark) and STATA  
20 12.0 (Stata Corporation, College Station, TX, USA). Categorical variables are  
21 presented as proportions or ratios, and associations were evaluated using relative risks  
22 (RRs) and 95% confidence intervals (CIs). Random-effects model attempted to  
23 generalize findings beyond the included studies by assuming that the selected studies  
24 are random samples from a larger population<sup>21</sup>, so it was used to pool studies to  
25 account for the substantial clinical heterogeneity (patients' age, type of surgery, types  
26 of controls [CM/NC or face mask], length of follow-up) between studies.

27 Heterogeneity between studies was quantified by the chi-square and  $I^2$  tests.  
28 Heterogeneity between studies was assessed as low ( $I^2=25\%$ ), medium ( $I^2=50\%$ ) or  
29 high ( $I^2=75\%$ )<sup>22</sup>. Univariable random-effects meta-regression was performed to  
30 investigate sources of heterogeneity between studies.



1  
2  
3  
4 1 Subgroup analyses were conducted to investigate the subpopulation of patients  
5 2 who were most likely to benefit from HFNC therapy. Subgroups were stratified by  
6 3 type of surgery (cardiac, thoracic or mixed surgery), study design (non-RCT or RCT),  
7 4 target SPO<sub>2</sub> level (90%-93% or 95%), strategy (prophylactic or therapy), and risk of  
8 5 re-intubation (high risk or low risk: the average values of risk-related parameters for  
9 6 re-intubation were assessed as previously reported <sup>9,10</sup>).

7 Sensitivity analysis, excluding one study at a time, was performed to explore the  
8 impact of study quality on the overall effect estimate of all included studies.

9 Publication bias was evaluated by Begg's funnel plot with pseudo 95%  
10 confidence limits.

11 The level of evidence of included studies was qualified using the  
12 GRADE (Grading of Recommendations, Assessment, Development and Evaluations)  
13 framework.

14 A 2-tailed *P* value <0.05 was considered statistically significant.

#### 15 **Patient and public involvement statement**

16 Patients and the public were not involved in this review.

#### 17 **RESULTS**

18 The searches identified 4572 potentially relevant articles, and 624 duplicates were  
19 excluded. After reviewing titles and abstracts, 30 studies were considered potentially  
20 eligible for inclusion. After analyzing the full text articles or conference abstracts, 10  
21 studies were included in the final analyses (**Figure 1**)

22 The characteristics of the included studies are shown in **Table 1**. The studies were  
23 published between 2013 and 2018 and were conducted in Oceania, Europe, Asia and  
24 American. Seven studies were RCTs, two were case-control studies, and one was a  
25 cohort study. The 10 studies included a total of 1327 post-extubation adult surgical  
26 patients, of which 615 patients received HFNC, and 712 received COT. Three studies  
27 were in patients who had undergone cardiac surgery <sup>17 23 24</sup>, 5 studies were in patients  
28 who had undergone thoracic surgery <sup>25-29</sup>, and 2 studies were mixed, including  
29 patients<sup>16,18</sup> who had undergone various types of surgeries. The patients were  
30 followed-up until ICU or hospital discharge.

## 1 **Assessment of Risk of Bias**

2 The results of the quality assessments are shown in **Figure 2A** and **Table 2**. None of  
3 the included studies were double blind. In the RCTs, blinding of patients and  
4 caregivers was impossible, and most authors regarded this as a limitation associated  
5 with their studies. One trial had reporting bias. Four trials were classified as having an  
6 unclear risk of bias <sup>25,26,28,29</sup>.

7 All the non-RCTs received seven stars on the modified Newcastle-Ottawa scale,  
8 because the assessment of outcomes were self-reported or unstated in the cohort  
9 study, and the selection of controls was not described in the case-control studies.

10 Begg's funnel plot revealed no evidence of publication bias for the primary  
11 outcomes, except for one outlier in the analysis of escalation of respiratory support<sup>18</sup>  
12 (**Figure 2B, 2C**).

## 13 **Outcomes**

### 14 *Primary outcomes*

15 Nine studies reported on the re-intubation rate in post-extubation adult surgical  
16 patients who received HFNC (n=507) or COT (n=600). The meta-analysis  
17 demonstrated that the re-intubation rate was significantly lower in patients who  
18 received HFNC compared to those who received COT (RR 0.38, 95% CI 0.23-0.61,  $P$   
19  $<0.0001$ ). There was no evidence of statistical heterogeneity between studies ( $I^2 =$   
20 0%) (**Figure 3**).

21 Ten studies reported on the rate of escalation of respiratory support in  
22 post-extubation adult surgical patients who received HFNC (n=615) or COT (n=712).  
23 The meta-analysis demonstrated that the rate of escalation of respiratory support was  
24 significantly lower in patients who received HFNC compared to those who received  
25 COT (RR 0.43, 95% CI 0.26 to 0.73,  $P =0.002$ ). There was evidence of statistical  
26 heterogeneity between studies ( $I^2 = 54%$ ) (**Figure 4**).

### 27 *Secondary outcomes*

28 Five studies reported on the incidence of PPCs in post-extubation adult surgical  
29 patients who received HFNC (n=252) or COT (n=354). The meta-analysis  
30 demonstrated no significant difference in the incidence of PPCs in patients who

1 received HFNC compared to those who received COT (RR 0.87, 95% CI 0.70-1.08,  
2  $p=0.21$ ). There was no evidence of statistical heterogeneity between studies ( $I^2 = 0\%$ )  
3 **(Figure 5A)**.

4 Five studies reported on mortality in post-extubation adult surgical patients who  
5 received HFNC (n=422) or COT (n=520). 5 patients (1.18%) who received HFNC and  
6 19 patients who received COT, died. However, the meta-analysis demonstrated no  
7 significant difference in mortality in patients who received HFNC compared to those  
8 who received COT (RR 0.45, 95% CI 0.16-1.29,  $P=0.14$ ) **(Figure 5B)**.

### 9 ***Subgroup analyses***

10 Subgroup analyses stratified by type of surgery (cardiac, thoracic or mixed surgery),  
11 study design (non-RCT or RCT), target SPO2 level (90%-93% or 95%), strategy  
12 (prophylactic or therapy), and risk of re-intubation (high risk or low risk) showed  
13 similar effect estimates for the primary and secondary outcomes as the overall  
14 analysis **(Table 3)**, except for cardiac surgery, prophylactic strategy and target SPO2  
15 level (90-93%), where there was no significant difference in the re-intubation rate in  
16 post-extubation adult surgical patients who received HFNC compared to those who  
17 received COT, and target SPO2 level (95%), where there was no significant  
18 difference in the rate of escalation of respiratory support in post-extubation adult  
19 surgical patients who received HFNC compared to those who received COT.

### 20 ***Random-effects meta-regression***

21 Meta-regression was used to analyze the sources of statistical heterogeneity between  
22 studies in the analyses investigating the rate of escalation of respiratory support. Type  
23 of surgery ( $b = 0.262$ ,  $P = 0.027$ ) and risk factors for intubation ( $b = 2.358$ ,  $P = 0.006$ )  
24 were found to be a potential source statistical heterogeneity **(Supplementary Figure**  
25 **2)**.

### 26 ***Sensitivity Analysis***

27 Sensitivity analyses excluding one study at a time showed similar effect estimates for  
28 the primary and secondary outcomes as the overall analysis **(Supplementary Figure**  
29 **3)**.

### 30 **GRADE**

1 Evidence was qualified using GRADE. Overall, high quality evidence showed that  
2 HFNC may have benefit when compared to COT in reducing the re-intubation rate in  
3 post-extubation adult surgical patients; however, the level of evidence for the case  
4 control study was low (**Supplementary Table 1A**).

5 Overall, low quality of evidence showed that HFNC may have benefit when  
6 compared to COT in reducing the need to escalate respiratory support in  
7 post-extubation adult surgical patients. The level of evidence for RCTs was  
8 downgraded due to medium statistical heterogeneity between studies, uncertain  
9 publication bias, and the level of evidence for the case control group was low due to  
10 factors associated with study design (**Supplementary Table 1B**).

## 11 12 **DISCUSSION**

13 The results from the present systematic review and meta-analysis of data from 10  
14 studies suggest that HFNC is associated with a significantly lower re-intubation rate  
15 and rate of escalation of respiratory support compared to COT in post-extubation  
16 adult surgical patients, but there is no difference in the incidence of PPCs or mortality.  
17 Subgroup analysis showed that HFNC reduced the re-intubation rate and the rate of  
18 escalation of respiratory support compared to COT in both randomized controlled  
19 trials and observational studies. These data suggest that the beneficial effects of  
20 HFNC, including washout of anatomic dead space, improved gas mixing in large  
21 airways, heating and humidification of inhaled gas, increased end-expiratory lung  
22 volume, improved oxygenation and reduced respiratory rate and inspiratory effort <sup>30-33</sup>  
23 are consistent across healthcare settings and treatment strategies.

24 Previous studies have investigated the safety and efficacy of HFNC in surgical  
25 and non-surgical patients. Two systematic reviews used traditional pairwise  
26 comparisons to evaluate the effectiveness of HFNC and COT in post-extubation adult  
27 patients <sup>34 35</sup>. In a meta-analysis including 2 studies and 495 cardiac surgical patients,  
28 Zhu et al found that HFNC after extubation was associated with a significant  
29 reduction in the rate of escalation of respiratory support compared to COT, but did not  
30 decrease re-intubation rate or the length of intensive care unit stay <sup>35</sup>. In a

1  
2  
3  
4 1 meta-analysis including 7 studies and 2781 adult patients, HFNC after extubation had  
5 2 a similar re-intubation rate compared to either COT or NIV. However, in a subgroup  
6 3 analysis of critically ill patients, HFNC after extubation had a lower re-intubation rate  
7 4 compared to COT <sup>34</sup>. In a study that assessed overall ICU mortality and other hospital  
8 5 outcomes in patients who received HFNC therapy that failed, failure of HFNC  
9 6 resulted in delayed intubation and worse clinical outcomes. Early intubated patients  
10 7 had better overall ICU mortality, extubation success, ventilator weaning, and more  
11 8 ventilator-free days than late intubated patients <sup>15</sup>. Taken together, the findings from  
12 9 the present review and these previous studies suggest that larger, well designed RCTs  
13 10 are required to further investigate the safety and efficacy of HFNC in post-extubation  
14 11 adult surgical patients.

12 In the present review, there was 'medium' heterogeneity between studies  
13 included in the analyses investigating the rate of escalation of respiratory support.  
14 This is not surprising, given the differences in type of surgery, study design, target  
15 SPO<sub>2</sub>, therapeutic strategy, and risk of re-intubation between the studies included in  
16 the analysis of this outcome. Meta-regression identified type of surgery and the risk  
17 factors for re-intubation as the main sources of heterogeneity.

18 Our subgroup analyses showed no improvement in the re-intubation rate in  
19 patients who had undergone cardiac surgery and received HFNC compared to COT  
20 post-extubation. Cardiac patients are at high risk for PPCs, and thus many may not  
21 benefit from HFNC. The ARISCAT risk score, which predicts the risk of PPCs after  
22 surgery, suggests that patients undergoing cardiac surgery have a high risk for PPCs,  
23 likely due to the intrathoracic incision and longer duration of surgery, which may be  
24 extended by the need for extracorporeal circulation <sup>15</sup>.

25 The subgroup analysis stratified by risk for re-intubation showed HFNC was  
26 associated with a lower re-intubation rate and rate of escalation of respiratory support  
27 compared to COT in post-extubation patients with a high risk for re-intubation.  
28 Consistent with this finding, previous reports show HFNC reduced re-intubation rate  
29 compared to COT in critically ill patients with low risk of intubation<sup>10</sup>, and was not

1 inferior to NIV for preventing re-intubation and post-extubated respiratory failure in  
2 critically ill patients at high risk of intubation <sup>9</sup>.

3 The present study suggests that when SPO<sub>2</sub> is maintained above 90%-93%,  
4 HFNC may have benefit compared to COT in reducing the need to escalate  
5 respiratory support, but not for decreasing the re-intubation rate. Conversely, when  
6 SPO<sub>2</sub> was maintained above 95%, HFNC reduced the re-intubation rate but not the  
7 rate of escalation of respiratory support. The advantages of reducing the need to  
8 escalate respiratory support at the lower SPO<sub>2</sub> threshold vs. delaying the time to  
9 re-intubation at the higher SPO<sub>2</sub> threshold remain to be elucidated. Recent studies  
10 show that critically ill patients treated with conservative oxygen therapy (with a  
11 slightly lower SPO<sub>2</sub> target) vs. conventional therapy had a lower mechanical  
12 ventilation time and hospital or ICU mortality <sup>36,37</sup>.

13 In the overall or subgroup analyses in the present review, HFNC did not  
14 significantly reduce the incidence of PPCs or mortality compared to COT in  
15 post-extubation surgical patients. These data are in contrast to a previous report,  
16 which speculated that HFNC may affect the outcomes of postoperative patients by  
17 alleviating PPCs<sup>5</sup>

18 This systematic review and meta-analysis was associated with several limitations.  
19 First, not all included studies investigated re-intubation rates and respiratory support  
20 escalation as primary endpoints, and most of the included studies were single-center  
21 studies. Second, there were differences in the timing and duration of HFNC treatment  
22 and length of follow-up in the included studies. Third, the sample size was small; 3  
23 out of 10 studies were non-RCTs, including less than 50 patients each. These  
24 limitations represent potential sources of bias and heterogeneity.

## 25 **Conclusion**

26 Findings from this review suggest that HFNC is associated with a significantly lower  
27 re-intubation rate and rate of escalation of respiratory support compared to COT in  
28 post-extubation adult surgical patients, but there is no difference in the incidence of  
29 PPCs or mortality. More well-designed, large randomized controlled trials are needed  
30 to determine the patient population that is most likely to benefit from HFNC therapy.

1  
2  
3  
4 15 2 **Footnotes**

7 3 **Contributors:** ZL and FG had full access to all the data in the study and take  
8 4 responsibility for its integrity and the accuracy of the data analysis. ZL, SM, JX, HQ  
9 5 and FG performed the systematic review, study selection, and statistical analysis. WC,  
10 6 JX, YY, and XZ contributed to data extraction and the quality assessment. All authors  
11 7 participated in writing the article.

12 8 **Funding:** This study was supported by grants from the National Science and  
13 9 Technology Major Project (2017ZX10103004), Key Laboratory of Environmental  
14 10 Medicine Engineering of Ministry of Education, Southeast University; National  
15 11 Natural Science Foundation of China (Grant numbers: 81670074, 81471843,  
16 12 81871602) and the projects of Jiangsu province's medical key discipline  
17 13 (ZDXKA2016025). The funding sources had no role in the design and conduct of the  
18 14 study; collection, management, analysis, and interpretation of the data; or preparation,  
19 15 review, or approval of the article.

20 16 **Competing interests:** None to declare.

21 17 **Patient consent:** Not required.

22 18 **Provenance and peer review:** Not commissioned; externally peer reviewed.

23 19 **Data sharing statement:** Data are available from the corresponding author on  
24 20 reasonable request [fmguo2003@139.com](mailto:fmguo2003@139.com)

21

22

23

24

25  
26  
27  
28  
29  
30  
31  
32  
33  
34  
35  
36  
37  
38  
39  
40  
41  
42  
43  
44  
45  
46  
47  
48  
49  
50  
51  
52  
53  
54  
55  
56  
57  
58  
59  
60



## References

1. Serpa Neto A, Hemmes SN, Barbas CS, et al. Incidence of mortality and morbidity related to postoperative lung injury in patients who have undergone abdominal or thoracic surgery: a systematic review and meta-analysis. *The Lancet Respiratory medicine* 2014;2(12):1007-15.
2. Melamed R, Boland LL, Normington JP, et al. Postoperative respiratory failure necessitating transfer to the intensive care unit in orthopedic surgery patients: risk factors, costs, and outcomes. *Perioperative medicine (London, England)* 2016;5:19.
3. Maggiore SM, Idone FA, Vaschetto R, et al. Nasal high-flow versus Venturi mask oxygen therapy after extubation. Effects on oxygenation, comfort, and clinical outcome. *American journal of respiratory and critical care medicine* 2014;190(3):282-8.
4. Ricard JD. High flow nasal oxygen in acute respiratory failure. *Minerva Anestesiol* 2012;78(7):836-41.
5. Ball L, Battaglini D, Pelosi P. Postoperative respiratory disorders. *Current opinion in critical care* 2016;22(4):379-85.
6. Stéphan F, Barrucand B, Petit P, et al. High-flow nasal oxygen vs noninvasive positive airway pressure in hypoxemic patients after cardiothoracic surgery: A randomized clinical trial. *JAMA - Journal of the American Medical Association* 2015;313(23):2331-39.
7. Ramirez A, Delord V, Khirani S, et al. Interfaces for long-term noninvasive positive pressure ventilation in children. *Intensive care medicine* 2012;38(4):655-62.
8. Zochios V, Collier T, Blandszun G, et al. The effect of high-flow nasal oxygen on hospital length of stay in cardiac surgical patients at high risk for respiratory complications: a randomised controlled trial. *Anaesthesia* 2018
9. Hernandez G, Vaquero C, Colinas L, et al. Effect of Postextubation High-Flow Nasal Cannula vs Noninvasive Ventilation on Reintubation and Postextubation Respiratory Failure in High-Risk Patients: A Randomized Clinical Trial. *Jama* 2016;316(15):1565-74.
10. Hernandez G, Vaquero C, Gonzalez P, et al. Effect of Postextubation High-Flow Nasal Cannula vs Conventional Oxygen Therapy on Reintubation in Low-Risk Patients: A Randomized Clinical Trial. *Jama* 2016;315(13):1354-61.
11. Corley A, Caruana LR, Barnett AG, et al. Oxygen delivery through high-flow nasal cannulae increase end-expiratory lung volume and reduce respiratory rate in post-cardiac surgical patients. *British journal of anaesthesia* 2011;107(6):998-1004.
12. Parke RL, McGuinness SP. Pressures delivered by nasal high flow oxygen during all phases of the respiratory cycle. *Respiratory care* 2013;58(10):1621-4.
13. Stephan F, Barrucand B, Petit P, et al. High-Flow Nasal Oxygen vs Noninvasive Positive Airway Pressure in Hypoxemic Patients After Cardiothoracic Surgery: A Randomized Clinical Trial. *Jama* 2015;313(23):2331-9.
14. Song HZ, Gu JX, Xiu HQ, et al. The value of high-flow nasal cannula oxygen therapy after extubation in patients with acute respiratory failure. *Clinics (Sao Paulo, Brazil)* 2017;72(9):562-67.
15. Kang BJ, Koh Y, Lim CM, et al. Failure of high-flow nasal cannula therapy may delay intubation and increase mortality. *Intensive care medicine* 2015;41(4):623-32.
16. Dhillon NK, Smith EJT, Ko A, et al. Extubation to high-flow nasal cannula in critically ill surgical patients. *The Journal of surgical research* 2017;217:258-64.
17. Parke R, McGuinness S, Dixon R, Jull A: Open-label, phase II study of routine high-flow nasal oxygen therapy in cardiac surgical patients. In *British journal of anaesthesia* 2013;925-931.



- 1 18. Futier E, Paugam-Burtz C, Godet T, et al. Effect of early postextubation high-flow nasal cannula vs  
2 conventional oxygen therapy on hypoxaemia in patients after major abdominal surgery: a French  
3 multicentre randomised controlled trial (OPERA). *Intensive care medicine* 2016;42(12):1888-98.
- 4 19. Higgins JP, Altman DG, Gotzsche PC, et al. The Cochrane Collaboration's tool for assessing risk of  
5 bias in randomised trials. *Bmj* 2011;343:d5928.
- 6 20. Stang A. Critical evaluation of the Newcastle-Ottawa scale for the assessment of the quality of  
7 nonrandomized studies in meta-analyses. *European journal of epidemiology* 2010;25(9):603-5.
- 8 21. Cheung MW, Ho RC, Lim Y, et al. Conducting a meta-analysis: basics and good practices.  
9 *International journal of rheumatic diseases* 2012;15(2):129-35.
- 10 22. Higgins JP, Thompson SG, Deeks JJ, et al. Measuring inconsistency in meta-analyses. *Bmj*  
11 2003;327(7414):557-60.
- 12 23. Corley A, Bull T, Spooner AJ, et al. Direct extubation onto high-flow nasal cannulae post-cardiac  
13 surgery versus standard treatment in patients with a BMI  $\geq$ 30: a randomised controlled trial.  
14 *Intensive care medicine* 2015;41(5):887-94.
- 15 24. Xu XP, Gao YF, Zhang BB. Evaluation of the effects of precautionary high-flow oxygen therapy in  
16 patients undergoing tracheal intubation after stanford type A aortic dissection. *Chin J Nurs(China)*  
17 2018;53:568-72.
- 18 25. Yu Y, Qian X, Liu C, et al. Effect of High-Flow Nasal Cannula versus Conventional Oxygen  
19 Therapy for Patients with Thoracoscopic Lobectomy after Extubation. 2017;2017:7894631.
- 20 26. Brainard J, Scott BK, Sullivan BL, et al. Heated humidified high-flow nasal cannula oxygen after  
21 thoracic surgery - A randomized prospective clinical pilot trial. *Journal of critical care* 2017;40:225-28.
- 22 27. Chen Gj, Xu HY, Pang H. Application of humidified high flow nasal cannula in respiratory failure  
23 patients post esophagectomy for esophageal cancer. *ChIN J Crit Care(China)*;38:301-4.
- 24 28. Geng XH. Application of nasal high-flow humidification oxygen therapy system in patients with  
25 acute respiratory failure after cardiothoracic surgery. *Shandong Medical Journal (China)* 2016;56:94-6.
- 26 29. Sun T, Zhu HL. Clinical application of high- flow nasal cannula for the respiratory failure  
27 following radical resection of pulmonary carcinoma. *Chin J Prac Nurs(China)* 2017;33:2335-38.
- 28 .
- 29 30. Goligher EC, Slutsky AS. Not Just Oxygen? Mechanisms of Benefit from High-Flow Nasal  
30 Cannula in Hypoxemic. *Respiratory Failure*. 2017; 195:1128-3
- 31 31. Papazian L, Corley A, Hess D, et al. Use of high-flow nasal cannula oxygenation in ICU adults: a  
32 narrative review. *Intensive care medicine* 2016;42:1336-49.
- 33 32. Testa G, Iodice F, Ricci Z, et al. Comparative evaluation of high-flow nasal cannula and  
34 conventional oxygen therapy in paediatric cardiac surgical patients: a randomized controlled trial.  
35 *Interactive cardiovascular and thoracic surgery* 2014;19:456-61.
- 36 33. Spoletini G, Alotaibi M, Blasi F, et al. Heated Humidified High-Flow Nasal Oxygen in Adults:  
37 Mechanisms of Action and Clinical Implications. *Chest* 2015;148:253-61.
- 38 34. Huang HW, Sun XM, Shi ZH, et al. Effect of High-Flow Nasal Cannula Oxygen Therapy Versus  
39 Conventional Oxygen Therapy and Noninvasive Ventilation on Reintubation Rate in Adult Patients  
40 After Extubation: A Systematic Review and Meta-Analysis of Randomized Controlled Trials. *Journal*  
41 *of intensive care medicine* 2017;885066617705118. 35. Zhu Y, Yin H, Zhang R, et al. High-flow nasal  
42 cannula oxygen therapy vs conventional oxygen therapy in cardiac surgical patients: A meta-analysis.  
43 *Journal of critical care* 2017;38:123-28.

1  
2  
3 1 36. Girardis M, Busani S, Damiani E, et al. Effect of Conservative vs Conventional Oxygen Therapy  
4 2 on Mortality Among Patients in an Intensive Care Unit: The Oxygen-ICU Randomized Clinical Trial.  
5 3 *Jama* 2016;316:1583-89.

6 37. Helmerhorst HJ, Schultz MJ, van der Voort PH, et al. Effectiveness and Clinical Outcomes of  
7 4 a Two-Step Implementation of Conservative Oxygenation Targets in Critically Ill Patients: A  
8 5 Before and After Trial. *Critical care medicine* 2016;44:554-63.

### 7 **Table and Figure legends**

8 Figure 1 Flow diagram of study selection

9 Figure 2A Risk of bias summary for each included study. Red (–) indicates high risk of  
10 bias; yellow (?) indicates unclear risk; and green (+) indicates low risk of bias.

11 Figure 2B, 2C Funnel plot for publication bias: B) Re-intubation rate; C) Rate of  
12 escalation of respiratory support

13 Figure 3 High-flow nasal cannula oxygen therapy (HFNC) versus conventional  
14 oxygen therapy (COT): Re-intubation rate

15 Figure 4 High-flow nasal cannula oxygen therapy (HFNC) versus conventional  
16 oxygen therapy (COT): Rate of escalation of respiratory support

17 Figure 5 High-flow nasal cannula oxygen therapy (HFNC) versus conventional  
18 oxygen therapy (COT): A) Postoperative pulmonary complications; B) Hospital  
19 mortality

20 Table 1 Characteristics of included studies

21 Table 2 Quality assessment: A) Cochrane collaboration methodology; B)  
22 Newcastle-Ottawa scale

23 Table 3 Subgroup analyses

24 Supplementary Figure 1 Search strategies for PubMed and Embase databases

25 Supplementary Figure 2 Meta regression: A) Type of surgery; B) Risk factors for  
26 intubation

27 Supplementary Figure 3 Sensitivity Analysis: A) Re-intubation rate; B) Rate of  
28 escalation of respiratory support

29 Supplementary Table 1 GRADE A) Re-intubation rate; B) Rate of escalation of  
30 respiratory support

31

32

1 Table 1: Characteristics of included studies

| Study                 | Study design       | Type of surgery               | Patient characteristics (HFNC/COT) |       |             | Target SPO2 (%) | Risk of re-intubation |
|-----------------------|--------------------|-------------------------------|------------------------------------|-------|-------------|-----------------|-----------------------|
|                       |                    |                               | Patient number                     | BMI   | Age (years) |                 |                       |
| <b>Chen, 2018</b>     | Case-control study | Thoracic                      | 44/45                              | NA    | 66/64       | 90              | High                  |
| <b>Xu, 2018</b>       | Cohort study       | Cardiovascular                | 45/45                              | 26/27 | 57/54       | 95              | High                  |
| <b>Brainard, 2017</b> | RCT                | Thoracic                      | 18/26                              | 26/25 | 57/59       | 95              | NA                    |
| <b>Dhillon, 2017</b>  | Case-control study | Mixed                         | 46/138                             | NA    | 63/58       | NA              | NA                    |
| <b>Geng, 2017</b>     | RCT                | Thoracic                      | 25/23                              | NA    | 63/63       | 90              | High                  |
| <b>Sun, 2017</b>      | RCT                | Thoracic                      | 24/24                              | NA    | 67/65       | 100             | High                  |
| <b>Yu, 2017</b>       | RCT                | Thoracic                      | 56/54                              | 26/25 | 56/56       | 95              | High                  |
| <b>Futier, 2016</b>   | RCT                | Abdominal or combine thoracic | 108/112                            | 25/25 | 62/661      | 95              | NA                    |
| <b>Corley, 2015</b>   | RCT                | Cardiovascular                | 81/74                              | 36/35 | 63/65       | 95              | High                  |
| <b>Parke, 2013</b>    | RCT                | Cardiovascular                | 169/171                            | 28/29 | 65/66       | 93              | High                  |

2 Data are expressed as median (interquartile range), or mean (standard deviation); NA, Not available or not reported

3

4

| Study                 | Characteristics of oxygen therapy (HFNC/COT) |                                                            | escalation of respiratory support# |                     | Strategy     | Study center  | Follow-up time: primary outcomes |
|-----------------------|----------------------------------------------|------------------------------------------------------------|------------------------------------|---------------------|--------------|---------------|----------------------------------|
|                       | HFNC Flow rate(L/min)                        | COT                                                        | HFNC                               | COT                 |              |               |                                  |
|                       |                                              |                                                            | NIV/Intubation                     | HFNC/NIV/Intubation |              |               |                                  |
| <b>Chen, 2018</b>     | 35-60                                        | Facemask                                                   | NA/7                               | NA/19               | Therapy      | Single center | 2 days                           |
| <b>Xu, 2018</b>       | 35-60                                        | 5-10L/min face mask                                        | 0/1                                | 0/0/7               | Prophylactic | Single center | 3 days                           |
| <b>Brainard, 2017</b> | 40                                           | Nasal cannula or face mask                                 | NA/1                               | NA/NA/2             | Prophylactic | Single center | 2 days                           |
| <b>Dhillon, 2017</b>  | NA                                           | Cool mist/nasal cannula (CM/NC)                            | NA/NA/3                            | NA/NA/19            | Prophylactic | Single center | NA                               |
| <b>Geng, 2017</b>     | 35-60                                        | Facemask                                                   | NA/NA/1                            | NA/NA/9             | Therapy      | Single center | NA                               |
| <b>Sun, 2017</b>      | 40-60                                        | 8-10L/min atomizing mask                                   | 1/3                                | 0/3/8               | Therapy      | Single center | 1 day                            |
| <b>Yu, 2017</b>       | 35-60                                        | Nasal prongs or facemask                                   | 2/0                                | 9/5/0               | Prophylactic | Multicenter   | 3                                |
| <b>Futier, 2016</b>   | 50-60                                        | Nasal prongs or facemask                                   | NA/NA(20)*                         | NA/NA/NA(14)*       | Prophylactic | Multicenter   | 7 days                           |
| <b>Corley, 2015</b>   | 35-50                                        | 2-4L/min via nasal cannulae or 6L/min via simple face mask | 3/0                                | 1/2/2               | Prophylactic | Single center | 1 day                            |
| <b>Parke, 2013</b>    | 45                                           | 2-4L/min via simple facemask or nasal prongs               | 9/2                                | 18/5/0              | Prophylactic | Single center | 2 days                           |

1 # only the final oxygen treatment was recorded; \* only get the total number; NA, Not available or not reported

1  
2  
3  
4  
5  
6  
7  
8  
9  
10  
11  
12  
13  
14  
15  
16  
17  
18  
19  
20  
21  
22  
23  
24  
25  
26  
27  
28  
29  
30  
31  
32  
33  
34  
35  
36  
37  
38  
39  
40  
41  
42  
43  
44  
45  
46

1  
2

Table 2 Quality assessment: Newcastle-Ottawa scale

| Study         | Selection                                |                                     |                           |                                                                          | Comparability                                                   | Outcome               |                                                 |                                  | Overall stars |
|---------------|------------------------------------------|-------------------------------------|---------------------------|--------------------------------------------------------------------------|-----------------------------------------------------------------|-----------------------|-------------------------------------------------|----------------------------------|---------------|
|               | Representativeness of the exposed cohort | Selection of the non exposed cohort | Ascertainment of exposure | Demonstration that outcome of interest was not present at start of study | Comparability of cohorts on the basis of the design or analysis | Assessment of outcome | Was follow-up long enough for outcomes to occur | Adequacy of follow up of cohorts |               |
| Xu, 2018      | ★                                        | ★                                   | ★                         | ★                                                                        | ★                                                               | -                     | ★                                               | ★                                | 7             |
| Chen, 2018    | ★                                        | ★                                   | -                         | ★                                                                        | ★                                                               | ★                     | ★                                               | ★                                | 7             |
| Dhillon, 2017 | ★                                        | ★                                   | ★                         | ★                                                                        | ★                                                               | -                     | ★                                               | ★                                | 7             |

★ the quality met the criterion of this specific item; - Self-reported or unstated

3  
4  
5

1 Table 3 Subgroup analyses

| Outcome                                       | No studies (No of patients) | Summary estimate (95% CI) | P value (summary estimate) | P value (heterogeneity) | I <sup>2</sup> (%) |
|-----------------------------------------------|-----------------------------|---------------------------|----------------------------|-------------------------|--------------------|
| <b>Re-intubation</b>                          | 9 (1107)                    | 0.38* (0.23 to 0.61)      | 0.0001                     | 0.64                    | 0                  |
| Cardiac surgery                               | 3 (585)                     | 0.43* (0.05 to 3.72)      | 0.44                       | 0.14                    | 49                 |
| Thoracic surgery                              | 5 (338)                     | 0.36* (0.20 to 0.64)      | 0.0005                     | 0.73                    | 0                  |
| RCT                                           | 6 (745)                     | 0.39* (0.17 to 0.87)      | 0.02                       | 0.41                    | 1                  |
| Non-RCT                                       | 3 (362)                     | 0.37* (0.20 to 0.69)      | 0.002                      | 0.60                    | 0                  |
| Min target SPO2 (90%-93%)                     | 3 (476)                     | 0.41* (0.09 to 1.92)      | 0.26                       | 0.11                    | 55                 |
| Min target SPO2 (95%)                         | 4 (399)                     | 0.31* (0.09 to 1.01)      | 0.05                       | 0.72                    | 0                  |
| prophylactic                                  | 7 (1143)                    | 0.46* (0.21 to 1.03)      | 0.06                       | 0.53                    | 0                  |
| Therapy                                       | 3 (184)                     | 0.34* (0.18 to 0.62)      | 0.0005                     | 0.45                    | 0                  |
| High risk of re-intubation                    | 7 (879)                     | 0.35* (0.20 to 0.60)      | 0.0002                     | 0.48                    | 0                  |
| <b>Escalation rate of respiratory support</b> | 10 (1327)                   | 0.43* (0.26 to 0.73)      | 0.002                      | 0.02                    | 54                 |
| Cardiac surgery                               | 3 (585)                     | 0.45* (0.25 to 0.81)      | 0.008                      | 0.51                    | 0                  |
| Thoracic surgery                              | 5 (338)                     | 0.31* (0.18 to 0.53)      | 0.0001                     | 0.47                    | 0                  |
| RCT                                           | 7 (965)                     | 0.46* (0.22 to 0.93)      | 0.03                       | 0.01                    | 64                 |
| Non-RCT                                       | 3 (362)                     | 0.37* (0.20 to 0.69)      | 0.002                      | 0.60                    | 0                  |
| Min target SPO2 (90%-93%)                     | 3 (476)                     | 0.39* (0.23 to 0.67)      | 0.0005                     | 0.34                    | 8                  |
| Min target SPO2 (95%)                         | 5 (619)                     | 0.46* (0.15 to 1.44)      | 0.18                       | 0.01                    | 70                 |
| prophylactic                                  | 7 (1143)                    | 0.50* (0.25 to 1.00)      | 0.05                       | 0.02                    | 59                 |
| Therapy                                       | 3 (184)                     | 0.34* (0.19 to 0.60)      | 0.0002                     | 0.45                    | 0                  |
| High risk of re-intubation                    | 7 (879)                     | 0.33* (0.22 to 0.49)      | 0.00001                    | 0.5                     | 0                  |
| <b>PPCs</b>                                   | 5 (606)                     | 0.87* (0.70 to 1.08)      | 0.21                       | 0.92                    | 0                  |
| RCT                                           | 4 (422)                     | 0.86* (0.69 to 1.086)     | 0.20                       | 0.83                    | 0                  |

|                            |         |                       |      |      |   |
|----------------------------|---------|-----------------------|------|------|---|
| prophylactic               | 4 (558) | 0.86* (0.68 to 1.08)  | 0.20 | 0.87 | 0 |
| <b>Mortality</b>           | 5 (942) | 0.45* (0.16 to 1.29)  | 0.14 | 0.79 | 0 |
| Cardiac surgery            | 1 (340) | 1.01* (0.06 to 16.05) | 0.99 | -    | - |
| Thoracic surgery           | 2 (198) | 0.26* (0.03 to 2.25)  | 0.22 | -    | - |
| RCT                        | 3 (670) | 0.77* (0.17 to 3.41)  | 0.73 | 0.82 | 0 |
| Non-RCT                    | 2 (272) | 0.27* (0.06 to 1.18)  | 0.08 | 0.98 | 0 |
| Min target SPO2 (90%-93%)  | 2 (428) | 0.41* (0.08 to 2.09)  | 0.29 | 0.45 | 0 |
| Min target SPO2 (95%)      | 2 (330) | 0.69* (0.12 to 4.06)  | 0.68 | -    | - |
| High risk of re-intubation | 3 (538) | 0.41* (0.08 to 2.09)  | 0.29 | 0.45 | 0 |

1 RCT, randomized controlled trial; PPCs, postoperative pulmonary complications \*Relative risk

2  
3  
4



Flow diagram of study selection

59x58mm (300 x 300 DPI)



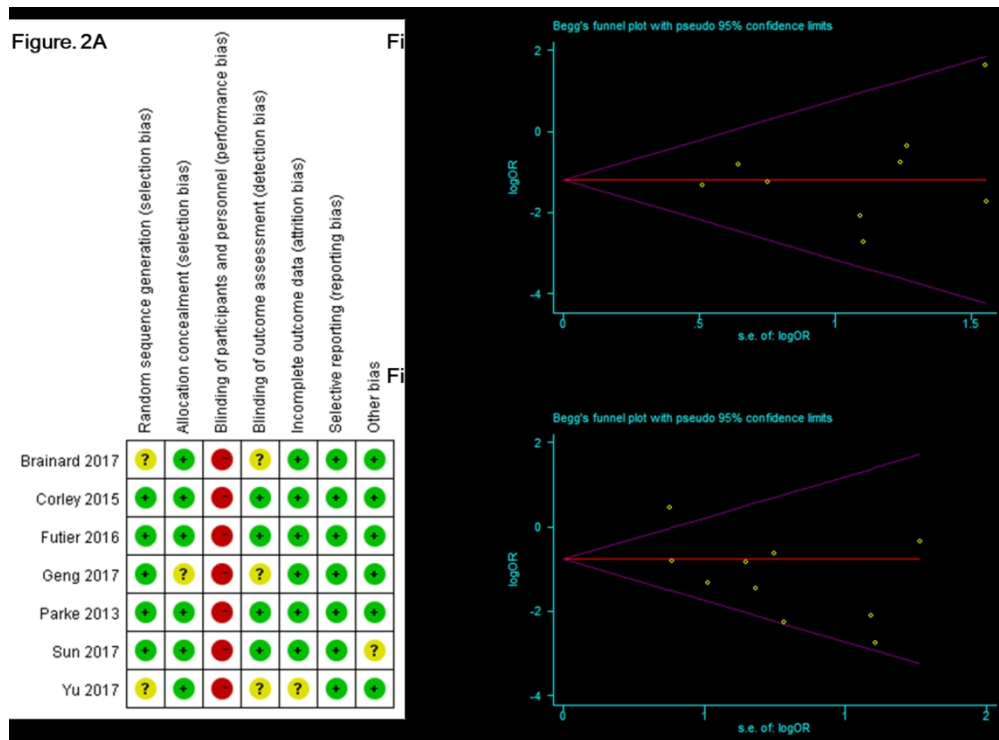

Figure 2A Risk of bias summary for each included study. Red (-) indicates high risk of bias; yellow (?) indicates unclear risk; and green (+) indicates low risk of bias.  
 Figure 2B, 2C Funnel plot for publication bias: B) Re-intubation rate; C) Rate of escalation of respiratory support

122x90mm (300 x 300 DPI)

1  
2  
3  
4  
5  
6  
7  
8  
9  
10  
11  
12  
13  
14  
15  
16  
17  
18  
19  
20  
21  
22  
23  
24  
25  
26  
27  
28  
29  
30  
31  
32  
33  
34  
35  
36  
37  
38  
39  
40  
41  
42  
43  
44  
45  
46  
47  
48  
49  
50  
51  
52  
53  
54  
55  
56  
57  
58  
59  
60

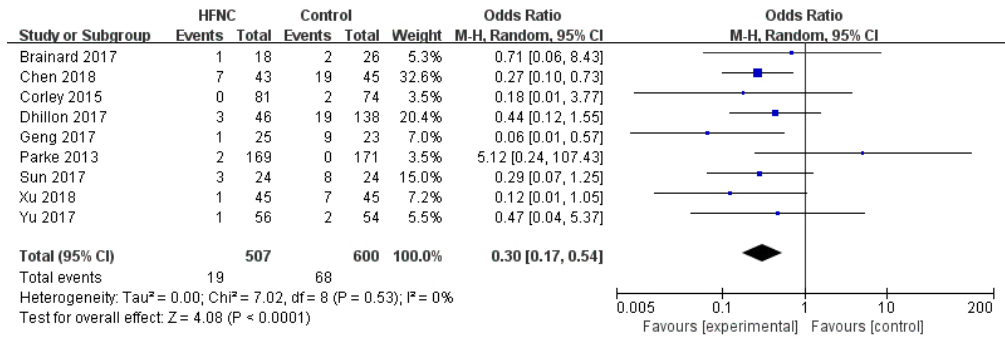

High-flow nasal cannula oxygen therapy (HFNC) versus conventional oxygen therapy (COT): Re-intubation rate

67x23mm (300 x 300 DPI)

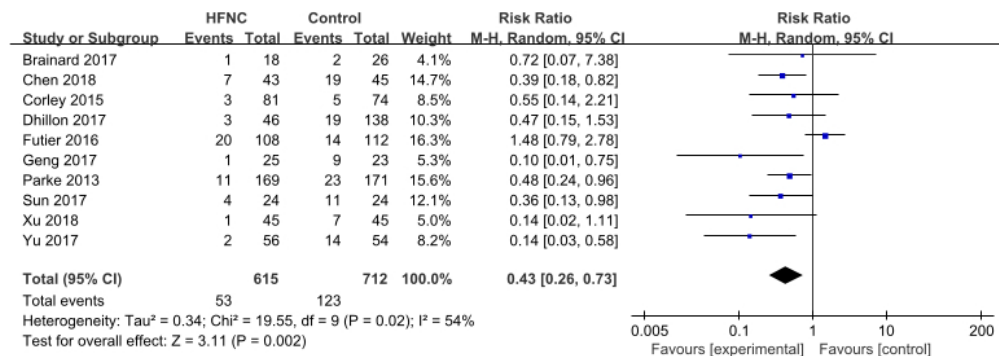

High-flow nasal cannula oxygen therapy (HFNC) versus conventional oxygen therapy (COT): Rate of escalation of respiratory support

65x22mm (300 x 300 DPI)

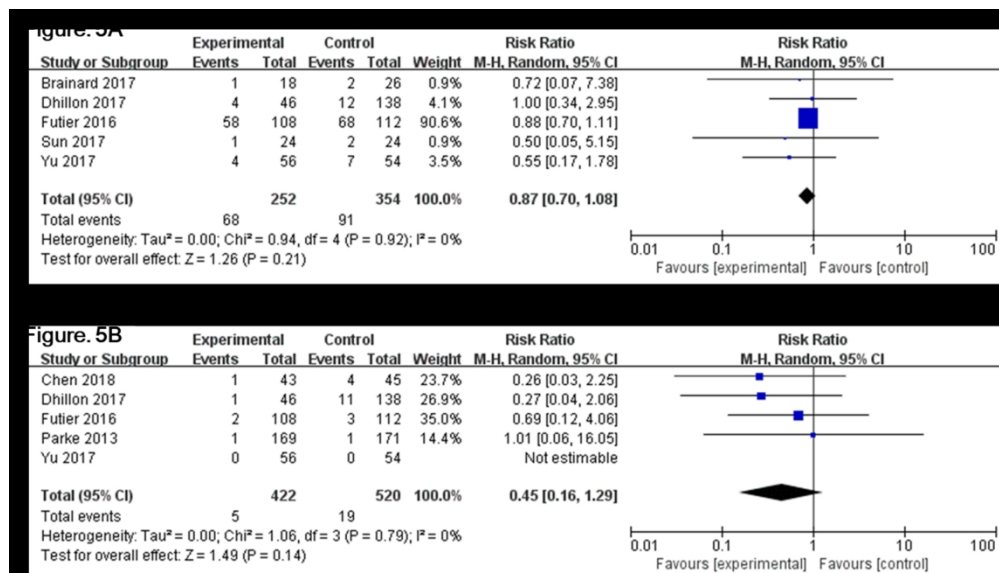

Figure 5 High-flow nasal cannula oxygen therapy (HFNC) versus conventional oxygen therapy (COT): A) Postoperative pulmonary complications; B) Hospital mortality

157x90mm (300 x 300 DPI)

1  
2  
3  
4  
5  
6  
7  
8  
9  
10  
11  
12  
13  
14  
15  
16  
17  
18  
19  
20  
21  
22  
23  
24  
25  
26  
27  
28  
29  
30  
31  
32  
33  
34  
35  
36  
37  
38  
39  
40  
41  
42  
43  
44  
45  
46  
47  
48  
49  
50  
51  
52  
53  
54  
55  
56  
57  
58  
59  
60

The scope search strategy to identify the trial study being published

**A:PubMed:**  
 (((((Surgically[Title/Abstract]) OR (((operation[Title/Abstract]) OR operative[Title/Abstract]) OR surgery[Title/Abstract]) OR Surgical[Title/Abstract]) )))) AND ((high flow[Title/Abstract]) OR high-flow[Title/Abstract])

**B:Embase**  
 #10. #7 AND #8 AND [humans]/lim AND [clinical study]/lim  
 #9. #7 AND #8  
 #8. #2 OR #3  
 #7. #1 OR #4 OR #5 OR #6  
 #6. 'operation':ab,ti  
 #5. 'operative':ab,ti  
 #4. 'surgical':ab,ti  
 #3. 'high-flow':ab,ti  
 #2. 'high flow':ab,ti  
 #1. 'surgery/exp

52x74mm (300 x 300 DPI)

1  
2  
3  
4  
5  
6  
7  
8  
9  
10  
11  
12  
13  
14  
15  
16  
17  
18  
19  
20  
21  
22  
23  
24  
25  
26  
27  
28  
29  
30  
31  
32  
33  
34  
35  
36  
37  
38  
39  
40  
41  
42  
43  
44  
45  
46  
47  
48  
49  
50  
51  
52  
53  
54  
55  
56  
57  
58  
59  
60

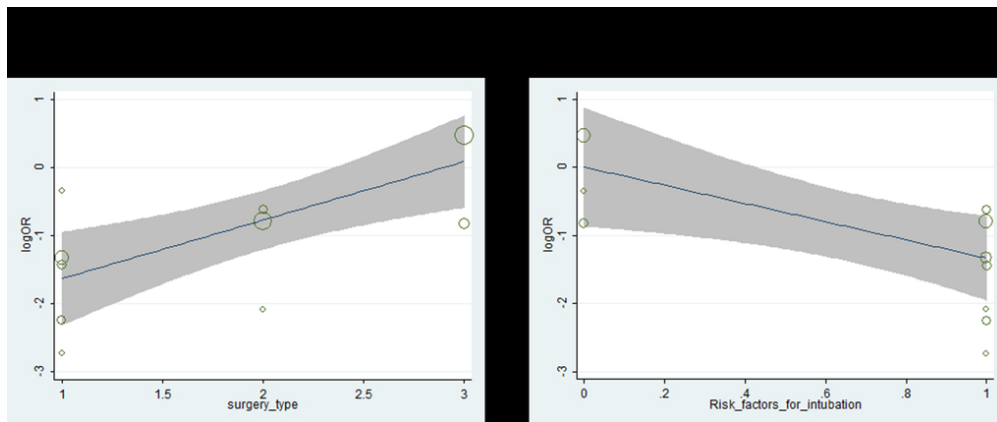

86x36mm (300 x 300 DPI)

1  
2  
3  
4  
5  
6  
7  
8  
9  
10  
11  
12  
13  
14  
15  
16  
17  
18  
19  
20  
21  
22  
23  
24  
25  
26  
27  
28  
29  
30  
31  
32  
33  
34  
35  
36  
37  
38  
39  
40  
41  
42  
43  
44  
45  
46  
47  
48  
49  
50  
51  
52  
53  
54  
55  
56  
57  
58  
59  
60

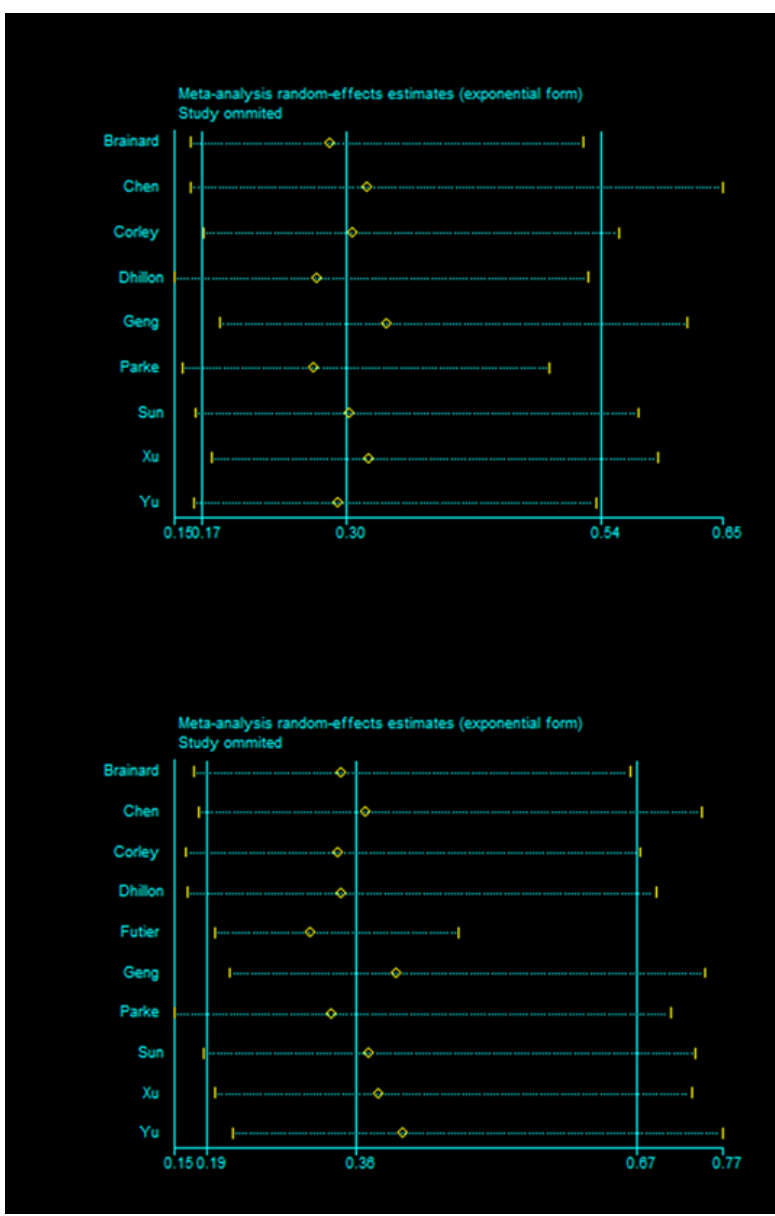

45x69mm (300 x 300 DPI)

Supplementary Table 1 GRADE A) Re-intubation rate; B) Rate of escalation of respiratory support

A.

| Quality assessment                |                       |                         |                          |                         |                        |                      | No of patients |                | Effect                 |                                                 | Quality          | Importance |
|-----------------------------------|-----------------------|-------------------------|--------------------------|-------------------------|------------------------|----------------------|----------------|----------------|------------------------|-------------------------------------------------|------------------|------------|
| No of studies                     | Design                | Risk of bias            | Inconsistency            | Indirectness            | Imprecision            | Other considerations | Reinbutation   | Control        | Relative (95% CI)      | Absolute                                        |                  |            |
| <b>Reintubation-RCT</b>           |                       |                         |                          |                         |                        |                      |                |                |                        |                                                 |                  |            |
| 6                                 | randomised trials     | no serious risk of bias | no serious inconsistency | no serious indirectness | no serious imprecision | none                 | 8/373 (2.1%)   | 23/372 (6.2%)  | RR 0.39 (0.17 to 0.87) | 38 fewer per 1000 (from 8 fewer to 51 fewer)    | ⊕⊕⊕⊕<br>HIGH     | CRITICAL   |
|                                   |                       |                         |                          |                         |                        |                      |                | 5.7%           |                        | 35 fewer per 1000 (from 7 fewer to 47 fewer)    |                  |            |
| <b>Case control studies</b>       |                       |                         |                          |                         |                        |                      |                |                |                        |                                                 |                  |            |
| 2                                 | observational studies | serious <sup>1</sup>    | no serious inconsistency | no serious indirectness | no serious imprecision | none                 | 10/89 (11.2%)  | 38/183 (20.8%) | OR 0.32 (0.15 to 0.71) | 130 fewer per 1000 (from 51 fewer to 170 fewer) | ⊕○○○<br>VERY LOW | CRITICAL   |
|                                   |                       |                         |                          |                         |                        |                      |                | 28%            |                        | 169 fewer per 1000 (from 64 fewer to 225 fewer) |                  |            |
| <b>Reintubation- Cohort study</b> |                       |                         |                          |                         |                        |                      |                |                |                        |                                                 |                  |            |
| 1                                 | observational studies | no serious risk of bias | no serious inconsistency | no serious indirectness | no serious imprecision | none                 | 1/45 (2.2%)    | 7/45 (15.6%)   | OR 0.12 (0.01 to 1.05) | 134 fewer per 1000 (from 154 fewer to 7 more)   | ⊕⊕○○<br>LOW      | CRITICAL   |
|                                   |                       |                         |                          |                         |                        |                      |                | 15.6%          |                        | 134 fewer per 1000 (from 154 fewer to 7 more)   |                  |            |



1  
2  
3  
4  
5  
6  
7  
8  
9  
10  
11  
12  
13  
14  
15  
16  
17  
18  
19  
20  
21  
22  
23  
24  
25  
26  
27  
28  
29  
30  
31  
32  
33  
34  
35  
36  
37  
38  
39  
40  
41  
42  
43  
44  
45  
46

|  |  |  |  |  |  |  |  |  |  |       |  |  |
|--|--|--|--|--|--|--|--|--|--|-------|--|--|
|  |  |  |  |  |  |  |  |  |  | more) |  |  |
|--|--|--|--|--|--|--|--|--|--|-------|--|--|

<sup>1</sup> High flow nasal cannula oxygen therapy or conventional oxygen therapy based on the individual attending's discretion

For peer review only

B.

| Quality assessment                                            |                                    |                         |                          |                         |                        |                             | No of patients                    |                | Effect                 |                                                 | Quality       | Importance |
|---------------------------------------------------------------|------------------------------------|-------------------------|--------------------------|-------------------------|------------------------|-----------------------------|-----------------------------------|----------------|------------------------|-------------------------------------------------|---------------|------------|
| No of studies                                                 | Design                             | Risk of bias            | Inconsistency            | Indirectness            | Imprecision            | Other considerations        | Escalation of respiratory support | Control        | Relative (95% CI)      | Absolute                                        |               |            |
| <b>Escalation of respiratory support-RCT</b>                  |                                    |                         |                          |                         |                        |                             |                                   |                |                        |                                                 |               |            |
| 7                                                             | randomised trials                  | no serious risk of bias | serious <sup>1</sup>     | no serious indirectness | no serious imprecision | reporting bias <sup>2</sup> | 42/481 (8.7%)                     | 78/484 (16.1%) | RR 0.54 (0.38 to 0.77) | 74 fewer per 1000 (from 37 fewer to 100 fewer)  | ⊕⊕○○ LOW      | CRITICAL   |
|                                                               |                                    |                         |                          |                         |                        |                             |                                   | 13.5%          |                        | 62 fewer per 1000 (from 31 fewer to 84 fewer)   |               |            |
| <b>Escalation of respiratory support-case control studies</b> |                                    |                         |                          |                         |                        |                             |                                   |                |                        |                                                 |               |            |
| 2                                                             | observational studies <sup>3</sup> | serious <sup>4</sup>    | no serious inconsistency | no serious indirectness | no serious imprecision | none                        | 10 cases 38 controls              |                | OR 0.32 (0.15 to 0.71) | -                                               | ⊕○○○ VERY LOW | CRITICAL   |
|                                                               |                                    |                         |                          |                         |                        |                             |                                   | 38/183 (20.8%) |                        | 130 fewer per 1000 (from 51 fewer to 170 fewer) |               |            |
|                                                               |                                    |                         |                          |                         |                        |                             |                                   | 28%            |                        | 169 fewer per 1000 (from 64 fewer to 225 fewer) |               |            |
| <b>Escalation of respiratory support- Cohort studies</b>      |                                    |                         |                          |                         |                        |                             |                                   |                |                        |                                                 |               |            |
| 1                                                             | observational studies              | no serious risk of bias | no serious inconsistency | no serious indirectness | no serious imprecision | none                        | 1/45 (2.2%)                       | 7/45 (15.6%)   | OR 0.12 (0.01 to       | 134 fewer per 1000 (from 154 fewer to 7         | ⊕⊕○○ LOW      | CRITICAL   |

1  
2  
3  
4  
5  
6  
7  
8  
9  
10  
11  
12  
13  
14  
15  
16  
17  
18  
19  
20  
21  
22  
23  
24  
25  
26  
27  
28  
29  
30  
31  
32  
33  
34  
35  
36  
37  
38  
39  
40  
41  
42  
43  
44  
45  
46

|  |  |  |  |  |  |  |  |       |       |                                                     |  |  |
|--|--|--|--|--|--|--|--|-------|-------|-----------------------------------------------------|--|--|
|  |  |  |  |  |  |  |  |       | 1.05) | more)                                               |  |  |
|  |  |  |  |  |  |  |  | 15.6% |       | 134 fewer per 1000<br>(from 154 fewer to 7<br>more) |  |  |

<sup>1</sup> I<sup>2</sup>=64%, the heterogeneity was high

<sup>2</sup> Funnel plots suggest that there may be publication bias in Futier's research

<sup>3</sup> case-control

<sup>4</sup> High flow nasal cannula oxygen therapy or conventional oxygen therapy based on the individual attending's discretion

For peer review only

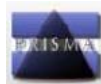

# PRISMA 2009 Checklist

| Section/topic                      | #  | Checklist item                                                                                                                                                                                                                                                                                              | Reported on page #               |
|------------------------------------|----|-------------------------------------------------------------------------------------------------------------------------------------------------------------------------------------------------------------------------------------------------------------------------------------------------------------|----------------------------------|
| <b>TITLE</b>                       |    |                                                                                                                                                                                                                                                                                                             |                                  |
| Title                              | 1  | Identify the report as a systematic review, meta-analysis, or both.                                                                                                                                                                                                                                         | Page1,line1-3                    |
| <b>ABSTRACT</b>                    |    |                                                                                                                                                                                                                                                                                                             |                                  |
| Structured summary                 | 2  | Provide a structured summary including, as applicable: background; objectives; data sources; study eligibility criteria, participants, and interventions; study appraisal and synthesis methods; results; limitations; conclusions and implications of key findings; systematic review registration number. | Page2,line1-27                   |
| <b>INTRODUCTION</b>                |    |                                                                                                                                                                                                                                                                                                             |                                  |
| Rationale                          | 3  | Describe the rationale for the review in the context of what is already known.                                                                                                                                                                                                                              | Page4,line2-21                   |
| Objectives                         | 4  | Provide an explicit statement of questions being addressed with reference to participants, interventions, comparisons, outcomes, and study design (PICOS).                                                                                                                                                  | Page4,line22-24;                 |
| <b>METHODS</b>                     |    |                                                                                                                                                                                                                                                                                                             |                                  |
| Protocol and registration          | 5  | Indicate if a review protocol exists, if and where it can be accessed (e.g., Web address), and, if available, provide registration information including registration number.                                                                                                                               | No                               |
| Eligibility criteria               | 6  | Specify study characteristics (e.g., PICOS, length of follow-up) and report characteristics (e.g., years considered, language, publication status) used as criteria for eligibility, giving rationale.                                                                                                      | Page5,line4-9                    |
| Information sources                | 7  | Describe all information sources (e.g., databases with dates of coverage, contact with study authors to identify additional studies) in the search and date last searched.                                                                                                                                  | Page4,line27-30<br>Page5,line1-3 |
| Search                             | 8  | Present full electronic search strategy for at least one database, including any limits used, such that it could be repeated.                                                                                                                                                                               | Supplementary Figure 1           |
| Study selection                    | 9  | State the process for selecting studies (i.e., screening, eligibility, included in systematic review, and, if applicable, included in the meta-analysis).                                                                                                                                                   | Page5,line13-18                  |
| Data collection process            | 10 | Describe method of data extraction from reports (e.g., piloted forms, independently, in duplicate) and any processes for obtaining and confirming data from investigators.                                                                                                                                  | Page5,line19-23<br>Page6,line1-6 |
| Data items                         | 11 | List and define all variables for which data were sought (e.g., PICOS, funding sources) and any assumptions and simplifications made.                                                                                                                                                                       | Page5,line24-30<br>Page6,line1-6 |
| Risk of bias in individual studies | 12 | Describe methods used for assessing risk of bias of individual studies (including specification of whether this was done at the study or outcome level), and how this information is to be used in any data synthesis.                                                                                      | Page6,line7-16                   |



# PRISMA 2009 Checklist

Page 1 of 2

|                      |    |                                                                                                                                                                    |                                  |
|----------------------|----|--------------------------------------------------------------------------------------------------------------------------------------------------------------------|----------------------------------|
| Summary measures     | 13 | State the principal summary measures (e.g., risk ratio, difference in means).                                                                                      | Page6,line17-27                  |
| Synthesis of results | 14 | Describe the methods of handling data and combining results of studies, if done, including measures of consistency (e.g., I <sup>2</sup> ) for each meta-analysis. | Page6,line28-29<br>Page7,line1-2 |

| Section/topic                 | #  | Checklist item                                                                                                                                                                                           | Reported on page #                                     |
|-------------------------------|----|----------------------------------------------------------------------------------------------------------------------------------------------------------------------------------------------------------|--------------------------------------------------------|
| Risk of bias across studies   | 15 | Specify any assessment of risk of bias that may affect the cumulative evidence (e.g., publication bias, selective reporting within studies).                                                             | Page7,line11-12                                        |
| Additional analyses           | 16 | Describe methods of additional analyses (e.g., sensitivity or subgroup analyses, meta-regression), if done, indicating which were pre-specified.                                                         | Page7,line1-10;                                        |
| <b>RESULTS</b>                |    |                                                                                                                                                                                                          |                                                        |
| Study selection               | 17 | Give numbers of studies screened, assessed for eligibility, and included in the review, with reasons for exclusions at each stage, ideally with a flow diagram.                                          | Figure1                                                |
| Study characteristics         | 18 | For each study, present characteristics for which data were extracted (e.g., study size, PICOS, follow-up period) and provide the citations.                                                             | Table 1                                                |
| Risk of bias within studies   | 19 | Present data on risk of bias of each study and, if available, any outcome level assessment (see item 12).                                                                                                | Page8,line3-13                                         |
| Results of individual studies | 20 | For all outcomes considered (benefits or harms), present, for each study: (a) simple summary data for each intervention group (b) effect estimates and confidence intervals, ideally with a forest plot. | Page8,line14-29                                        |
| Synthesis of results          | 21 | Present results of each meta-analysis done, including confidence intervals and measures of consistency.                                                                                                  | Table 3                                                |
| Risk of bias across studies   | 22 | Present results of any assessment of risk of bias across studies (see Item 15).                                                                                                                          | Table 2 and Fig2A                                      |
| Additional analysis           | 23 | Give results of additional analyses, if done (e.g., sensitivity or subgroup analyses, meta-regression [see Item 16]).                                                                                    | Supplementary Figure 2, supplementary Figure 3         |
| <b>DISCUSSION</b>             |    |                                                                                                                                                                                                          |                                                        |
| Summary of evidence           | 24 | Summarize the main findings including the strength of evidence for each main outcome; consider their relevance to key groups (e.g., healthcare providers, users, and policy makers).                     | Page10,line16-30<br>Page11,line1-30<br>Page12,line1-20 |
| Limitations                   | 25 | Discuss limitations at study and outcome level (e.g., risk of bias), and at review-level (e.g., incomplete retrieval of identified research, reporting bias).                                            | Page12,line21-27                                       |

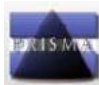

# PRISMA 2009 Checklist

1  
2  
3  
4  
5  
6  
7  
8  
9  
10  
11  
12  
13  
14  
15  
16  
17  
18  
19  
20  
21  
22  
23  
24  
25  
26  
27  
28  
29  
30  
31  
32  
33  
34  
35  
36  
37  
38  
39  
40  
41  
42  
43  
44  
45  
46  
47

|                |    |                                                                                                                                            |                                    |
|----------------|----|--------------------------------------------------------------------------------------------------------------------------------------------|------------------------------------|
| Conclusions    | 26 | Provide a general interpretation of the results in the context of other evidence, and implications for future research.                    | Page12,line28-30<br>Page13,line1-3 |
| <b>FUNDING</b> |    |                                                                                                                                            |                                    |
| Funding        | 27 | Describe sources of funding for the systematic review and other support (e.g., supply of data); role of funders for the systematic review. | Page13,line11-18                   |

From: Moher D, Liberati A, Tetzlaff J, Altman DG, The PRISMA Group (2009). Preferred Reporting Items for Systematic Reviews and Meta-Analyses: The PRISMA Statement. PLoS Med 6(7): e1000097. doi:10.1371/journal.pmed1000097

For more information, visit: [www.prisma-statement.org](http://www.prisma-statement.org).

Page 2 of 2
