# Supplementary material for: Effect of high-flow nasal cannula oxygen therapy compared with conventional oxygen therapy in postoperative patients: a systematic review and meta-analysis
Source: PubMed Central journal article supplement — BMJ Open. 2019 Aug 2;9(8):e027523. doi: 10.1136/bmjopen-2018-027523 (PMC6687012; doi:10.1136/bmjopen-2018-027523), 2019-08-02
Supplement: bmjopen-2018-027523supp004.pdf [file bmjopen-2018-027523supp004.pdf]

Supplementary Table 1 GRADE A) Re-intubation rate; B) Rate of escalation of respiratory support

A.

| Quality assessment                |                       |                         |                          |                         |                        |                      | No of patients   |                   | Effect                    |                                                 | Quality          | Importance |
|-----------------------------------|-----------------------|-------------------------|--------------------------|-------------------------|------------------------|----------------------|------------------|-------------------|---------------------------|-------------------------------------------------|------------------|------------|
| No of studies                     | Design                | Risk of bias            | Inconsistency            | Indirectness            | Imprecision            | Other considerations | Reinbutation     | Control           | Relative (95% CI)         | Absolute                                        |                  |            |
| <b>Reintubation-RCT</b>           |                       |                         |                          |                         |                        |                      |                  |                   |                           |                                                 |                  |            |
| 6                                 | randomised trials     | no serious risk of bias | no serious inconsistency | no serious indirectness | no serious imprecision | none                 | 8/373<br>(2.1%)  | 23/372<br>(6.2%)  | RR 0.39<br>(0.17 to 0.87) | 38 fewer per 1000 (from 8 fewer to 51 fewer)    | ⊕⊕⊕⊕<br>HIGH     | CRITICAL   |
|                                   |                       |                         |                          |                         |                        |                      |                  | 5.7%              |                           | 35 fewer per 1000 (from 7 fewer to 47 fewer)    |                  |            |
| <b>Case control studies</b>       |                       |                         |                          |                         |                        |                      |                  |                   |                           |                                                 |                  |            |
| 2                                 | observational studies | serious <sup>1</sup>    | no serious inconsistency | no serious indirectness | no serious imprecision | none                 | 10/89<br>(11.2%) | 38/183<br>(20.8%) | OR 0.32<br>(0.15 to 0.71) | 130 fewer per 1000 (from 51 fewer to 170 fewer) | ⊕○○○<br>VERY LOW | CRITICAL   |
|                                   |                       |                         |                          |                         |                        |                      |                  | 28%               |                           | 169 fewer per 1000 (from 64 fewer to 225 fewer) |                  |            |
| <b>Reintubation- Cohort study</b> |                       |                         |                          |                         |                        |                      |                  |                   |                           |                                                 |                  |            |
| 1                                 | observational studies | no serious risk of bias | no serious inconsistency | no serious indirectness | no serious imprecision | none                 | 1/45<br>(2.2%)   | 7/45<br>(15.6%)   | OR 0.12<br>(0.01 to 1.05) | 134 fewer per 1000 (from 154 fewer to 7 more)   | ⊕⊕○○<br>LOW      | CRITICAL   |
|                                   |                       |                         |                          |                         |                        |                      |                  | 15.6%             |                           | 134 fewer per 1000 (from 154 fewer to 7 more)   |                  |            |

|  |  |  |  |  |  |  |  |  |  |       |  |  |
|--|--|--|--|--|--|--|--|--|--|-------|--|--|
|  |  |  |  |  |  |  |  |  |  | more) |  |  |
|--|--|--|--|--|--|--|--|--|--|-------|--|--|

<sup>1</sup> High flow nasal cannula oxygen therapy or conventional oxygen therapy based on the individual attending's discretion

B.

| Quality assessment                                            |                                    |                         |                          |                         |                        |                             | No of patients                    |                | Effect                 |                                                 | Quality         | Importance |
|---------------------------------------------------------------|------------------------------------|-------------------------|--------------------------|-------------------------|------------------------|-----------------------------|-----------------------------------|----------------|------------------------|-------------------------------------------------|-----------------|------------|
| No of studies                                                 | Design                             | Risk of bias            | Inconsistency            | Indirectness            | Imprecision            | Other considerations        | Escalation of respiratory support | Control        | Relative (95% CI)      | Absolute                                        |                 |            |
| <b>Escalation of respiratory support-RCT</b>                  |                                    |                         |                          |                         |                        |                             |                                   |                |                        |                                                 |                 |            |
| 7                                                             | randomised trials                  | no serious risk of bias | serious <sup>1</sup>     | no serious indirectness | no serious imprecision | reporting bias <sup>2</sup> | 42/481 (8.7%)                     | 78/484 (16.1%) | RR 0.54 (0.38 to 0.77) | 74 fewer per 1000 (from 37 fewer to 100 fewer)  | ⊕⊕⊕<br>LOW      | CRITICAL   |
|                                                               |                                    |                         |                          |                         |                        |                             |                                   | 13.5%          |                        | 62 fewer per 1000 (from 31 fewer to 84 fewer)   |                 |            |
| <b>Escalation of respiratory support-case control studies</b> |                                    |                         |                          |                         |                        |                             |                                   |                |                        |                                                 |                 |            |
| 2                                                             | observational studies <sup>3</sup> | serious <sup>4</sup>    | no serious inconsistency | no serious indirectness | no serious imprecision | none                        | 10 cases 38 controls              |                | OR 0.32 (0.15 to 0.71) | -                                               | ⊕⊕⊕<br>VERY LOW | CRITICAL   |
|                                                               |                                    |                         |                          |                         |                        |                             |                                   | 38/183 (20.8%) |                        | 130 fewer per 1000 (from 51 fewer to 170 fewer) |                 |            |
|                                                               |                                    |                         |                          |                         |                        |                             |                                   | 28%            |                        | 169 fewer per 1000 (from 64 fewer to 225 fewer) |                 |            |
| <b>Escalation of respiratory support- Cohort studies</b>      |                                    |                         |                          |                         |                        |                             |                                   |                |                        |                                                 |                 |            |
| 1                                                             | observational studies              | no serious risk of bias | no serious inconsistency | no serious indirectness | no serious imprecision | none                        | 1/45 (2.2%)                       | 7/45 (15.6%)   | OR 0.12 (0.01 to       | 134 fewer per 1000 (from 154 fewer to 7         | ⊕⊕⊕<br>LOW      | CRITICAL   |

|  |  |  |  |  |  |  |  |       |       |                                                     |  |  |
|--|--|--|--|--|--|--|--|-------|-------|-----------------------------------------------------|--|--|
|  |  |  |  |  |  |  |  |       | 1.05) | more)                                               |  |  |
|  |  |  |  |  |  |  |  | 15.6% |       | 134 fewer per 1000<br>(from 154 fewer to 7<br>more) |  |  |

<sup>1</sup> I<sup>2</sup>=64%, the heterogeneity was high

<sup>2</sup> Funnel plots suggest that there may be publication bias in Futier's research

<sup>3</sup> case-control

<sup>4</sup> High flow nasal cannula oxygen therapy or conventional oxygen therapy based on the individual attending's discretion
